# Supplementary material
Source: publisher figshare collection journal article supplement (https://tandf.figshare.com/articles/dataset/_/8313554)
Supplement: Supplementary file 1 [file 1]

## **Supplemental Figure S1:**

Mapping Methods used in: Millar, C.I. and Westfall, R.D. Rock glaciers of the Great Basin, USA: Distribution, climate, and hydrologic significance

Imagery that follows is taken from Google Earth Pro, vs. 7.3.2, with varying image dates.

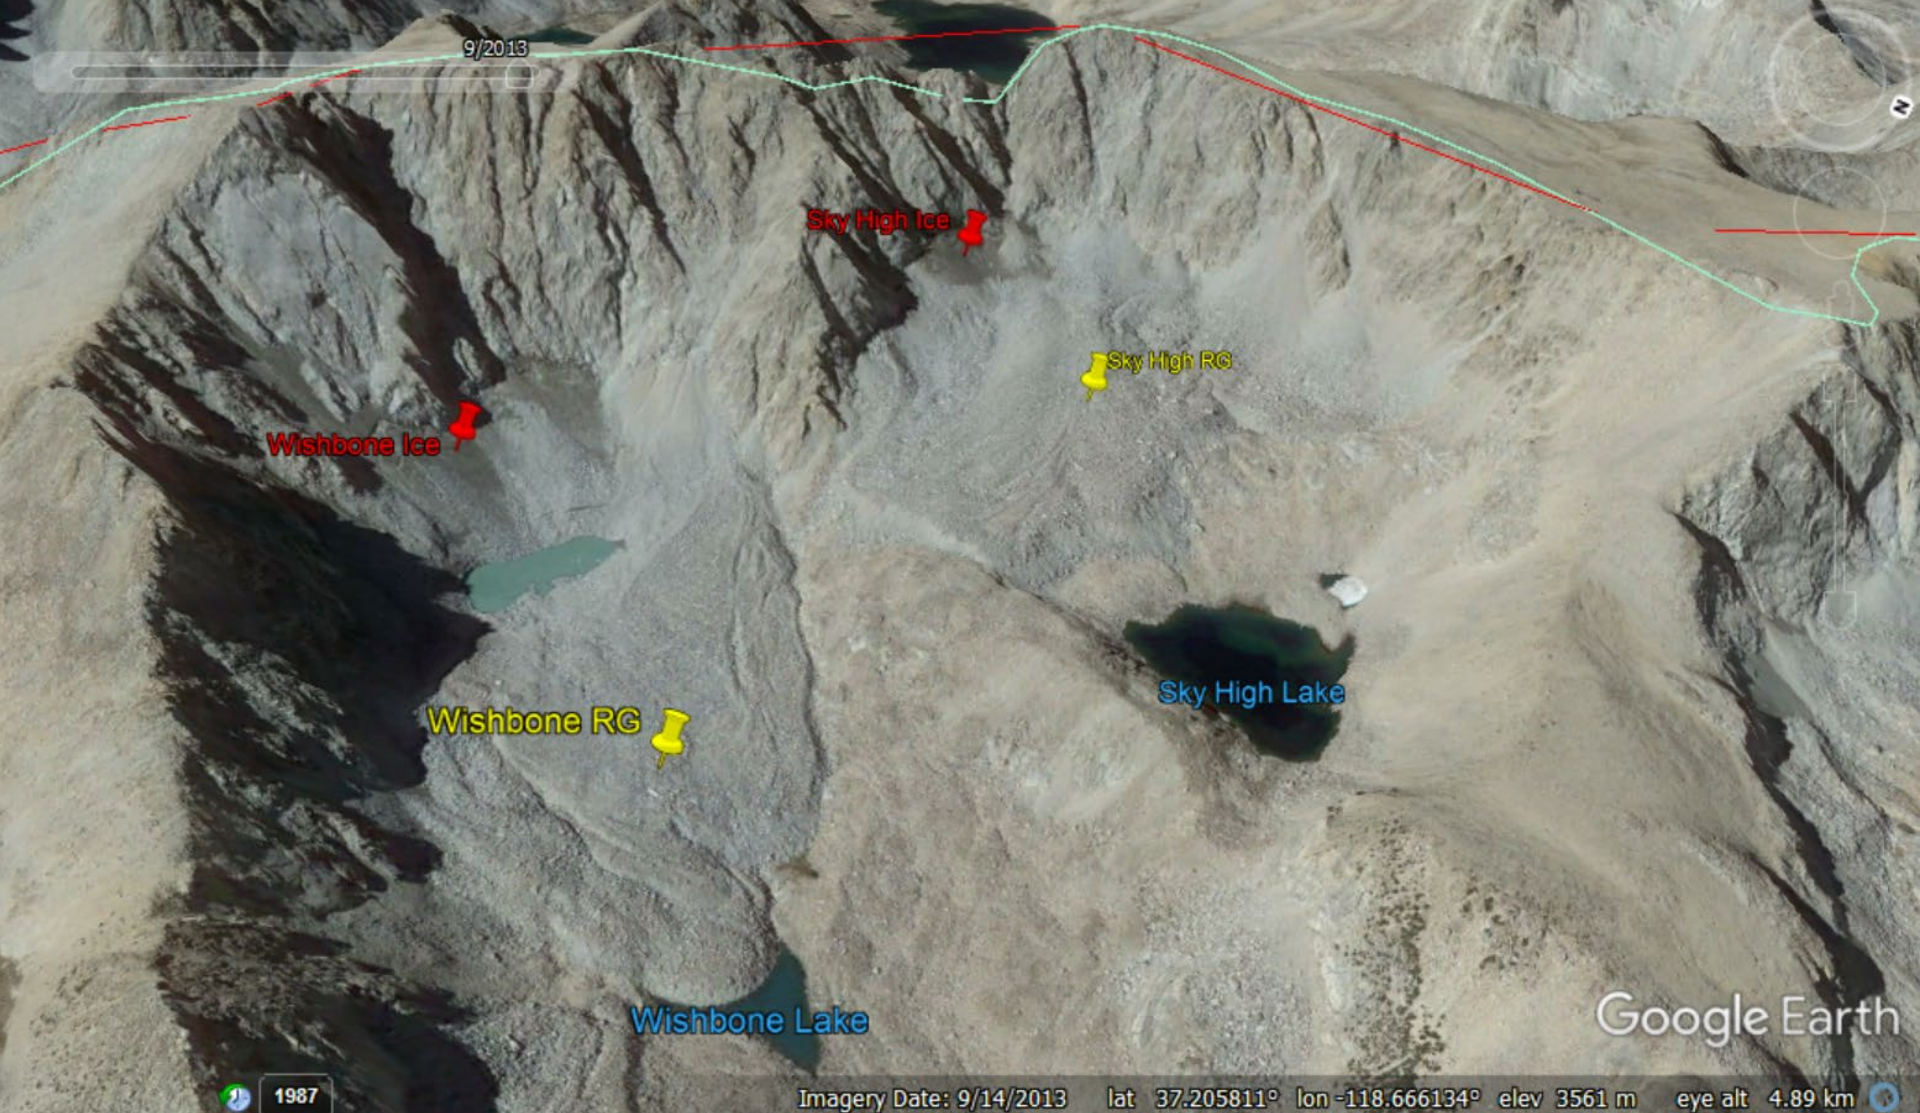

**Figure S1(a)**

**Sky High and Wishbone Rock Glaciers (RG), Sierra Nevada, CA with Associated Icefields (red pins)**

Red/aqua lines are the crest of the Sierra Nevada and the western hydrographic boundary of the Great Basin.

Sky High Rock Glacier center at yellow pin:  $37.205573^{\circ}$ ;  $-118.673769^{\circ}$ , 3737 m;

Wishbone Rock Glacier center at yellow pin:  $37.203375^{\circ}$   $-118.665006^{\circ}$ , 3578 m;

Both rock glaciers were scored as "active." GEP Historical Imagery: September 14, 2013

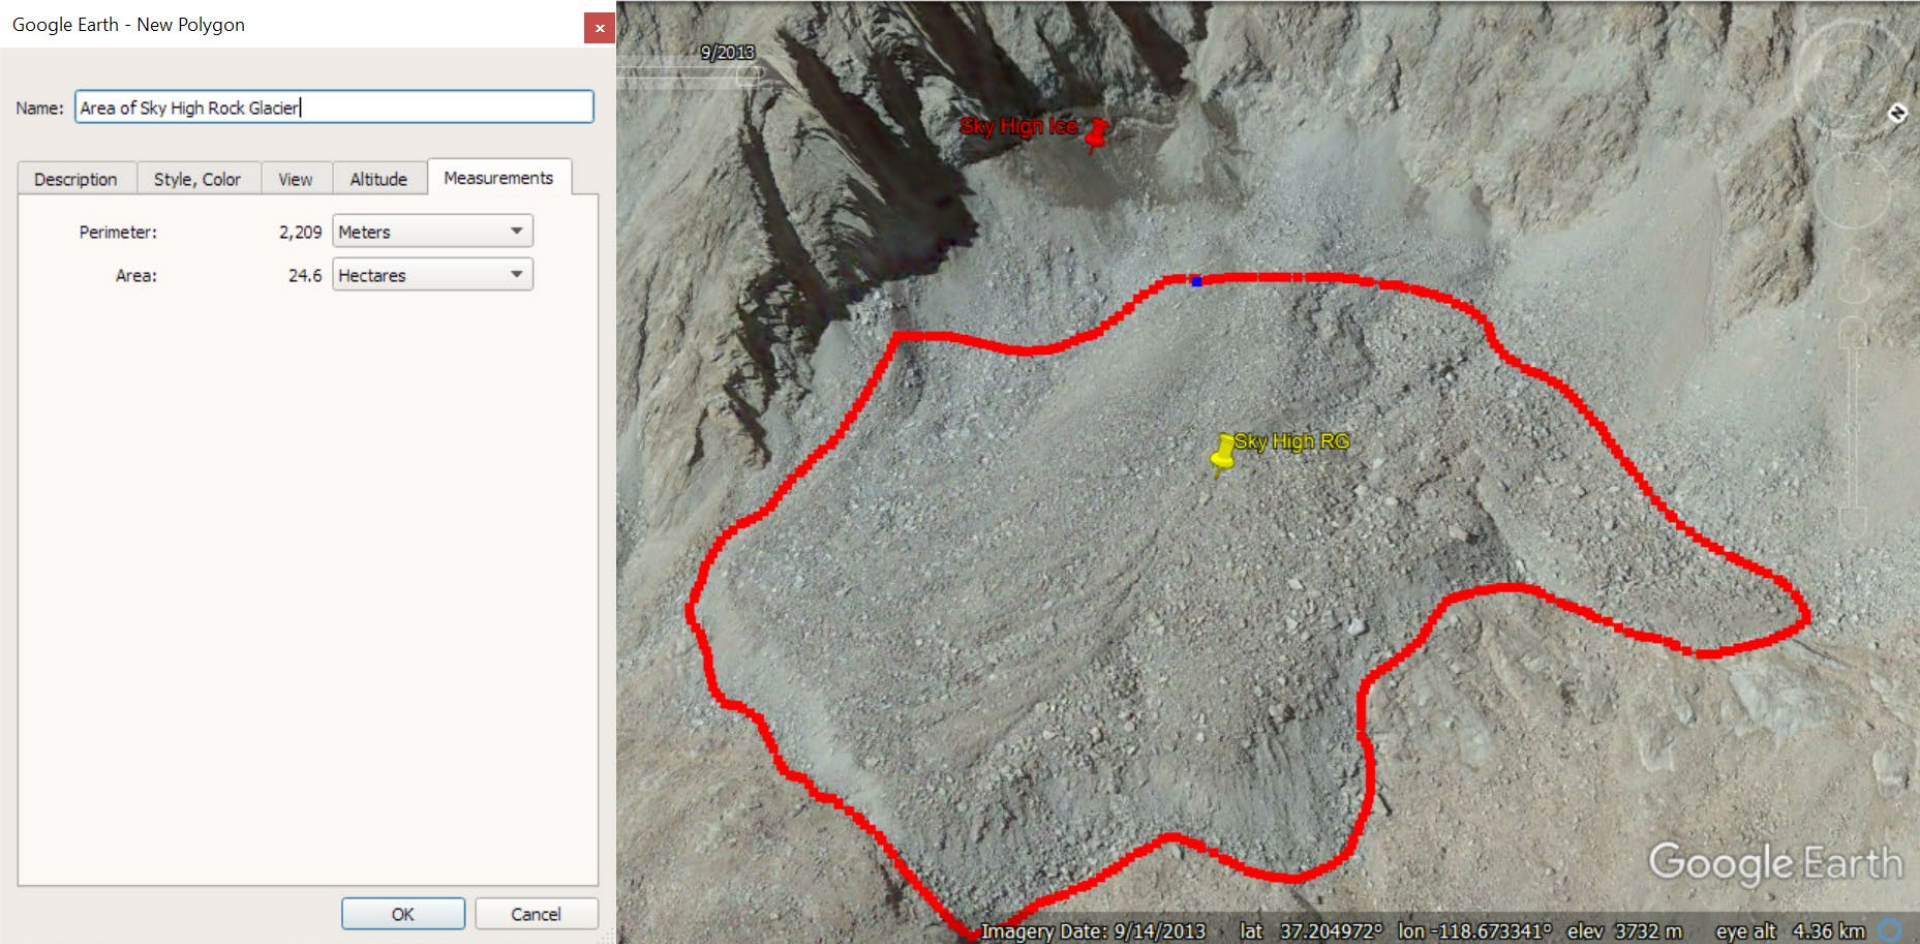

**Figure S1(b)**  
**Estimating Area of Sky High Rock Glacier (24.6 ha) with the Polygon Tool in GEP**  
Aspect estimated from GEP compass.  
GEP Historical Imagery: September 14, 2013

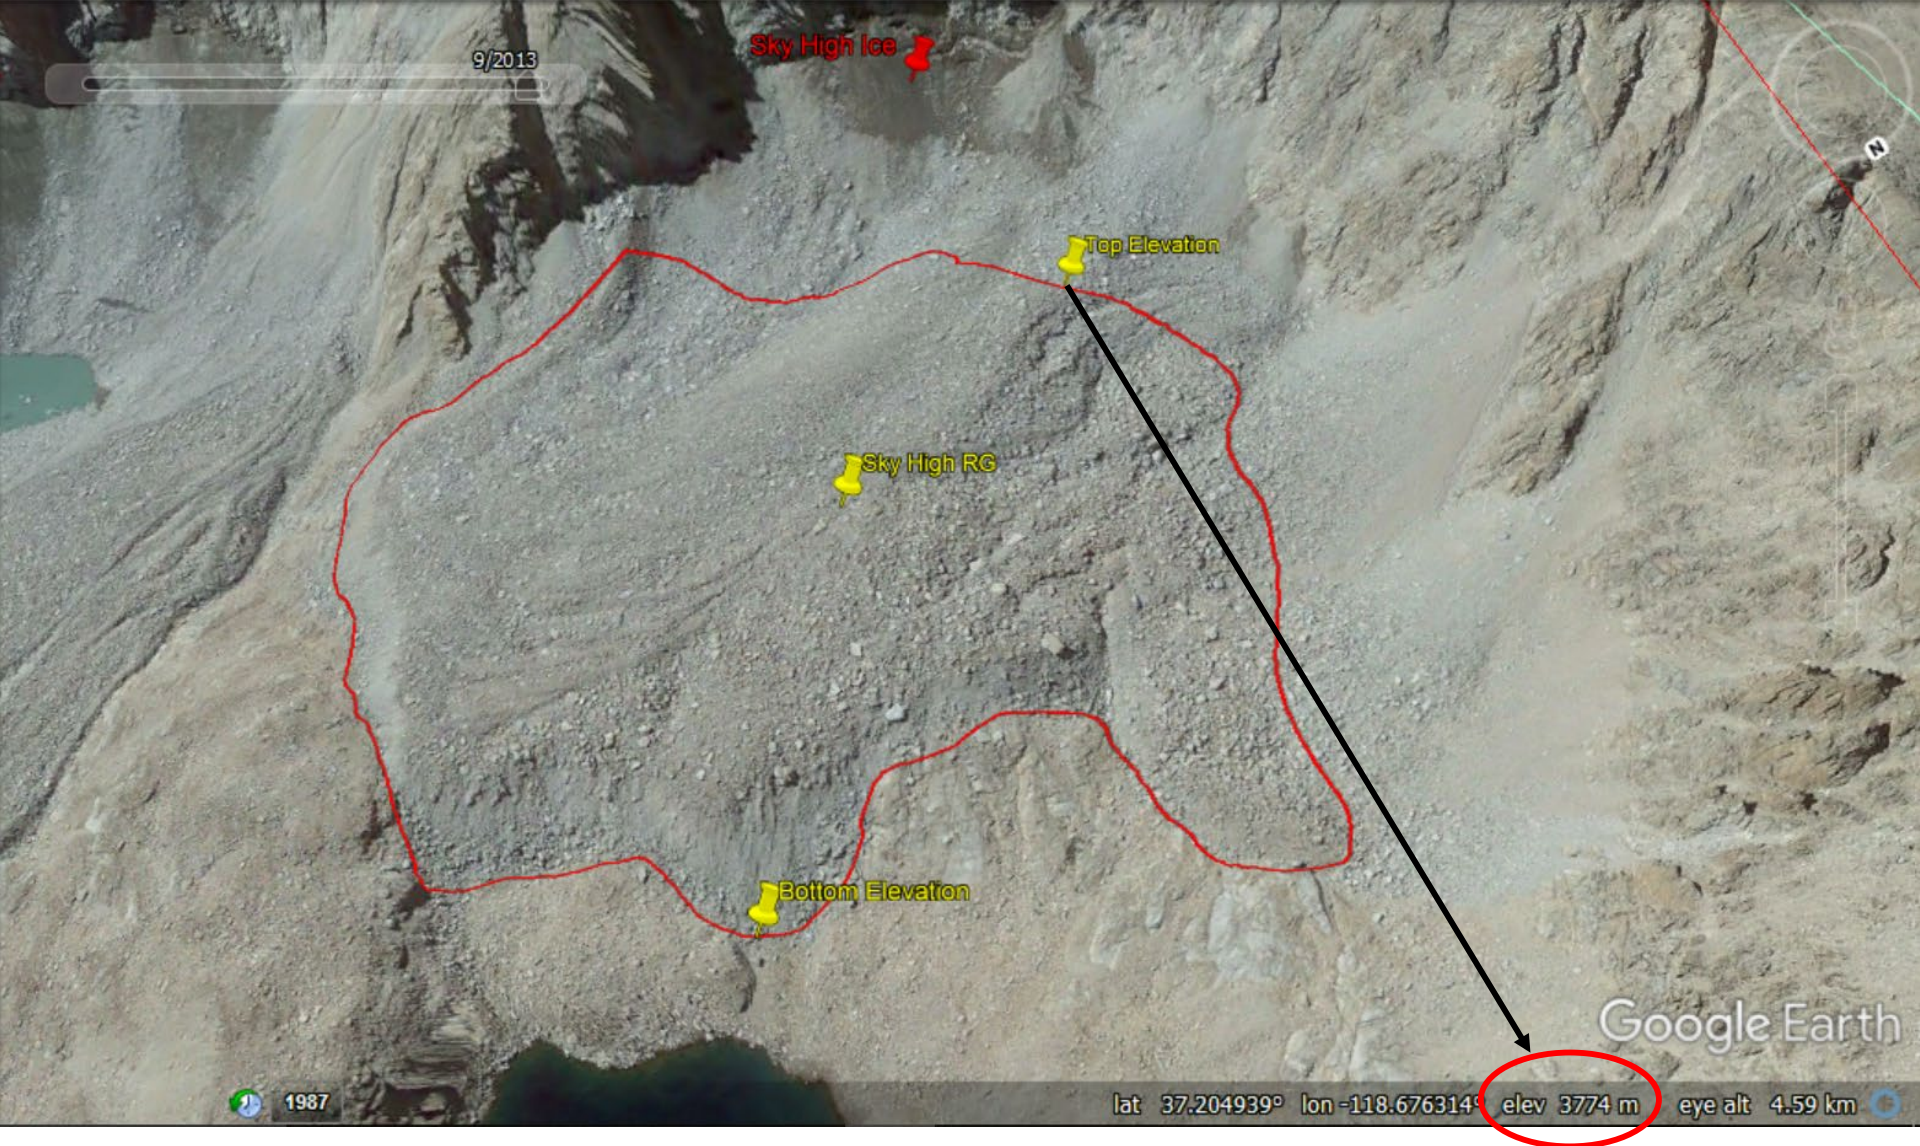

**Figure S1( c)**

**Estimating Top and Bottom Elevations of Sky High Rock Glacier**

Pins placed at highest and lowest points;

Hover cursor over pins to get elevations (e.g., top elevation, 3774 m)

GEP Historical Imagery: September 14, 2013

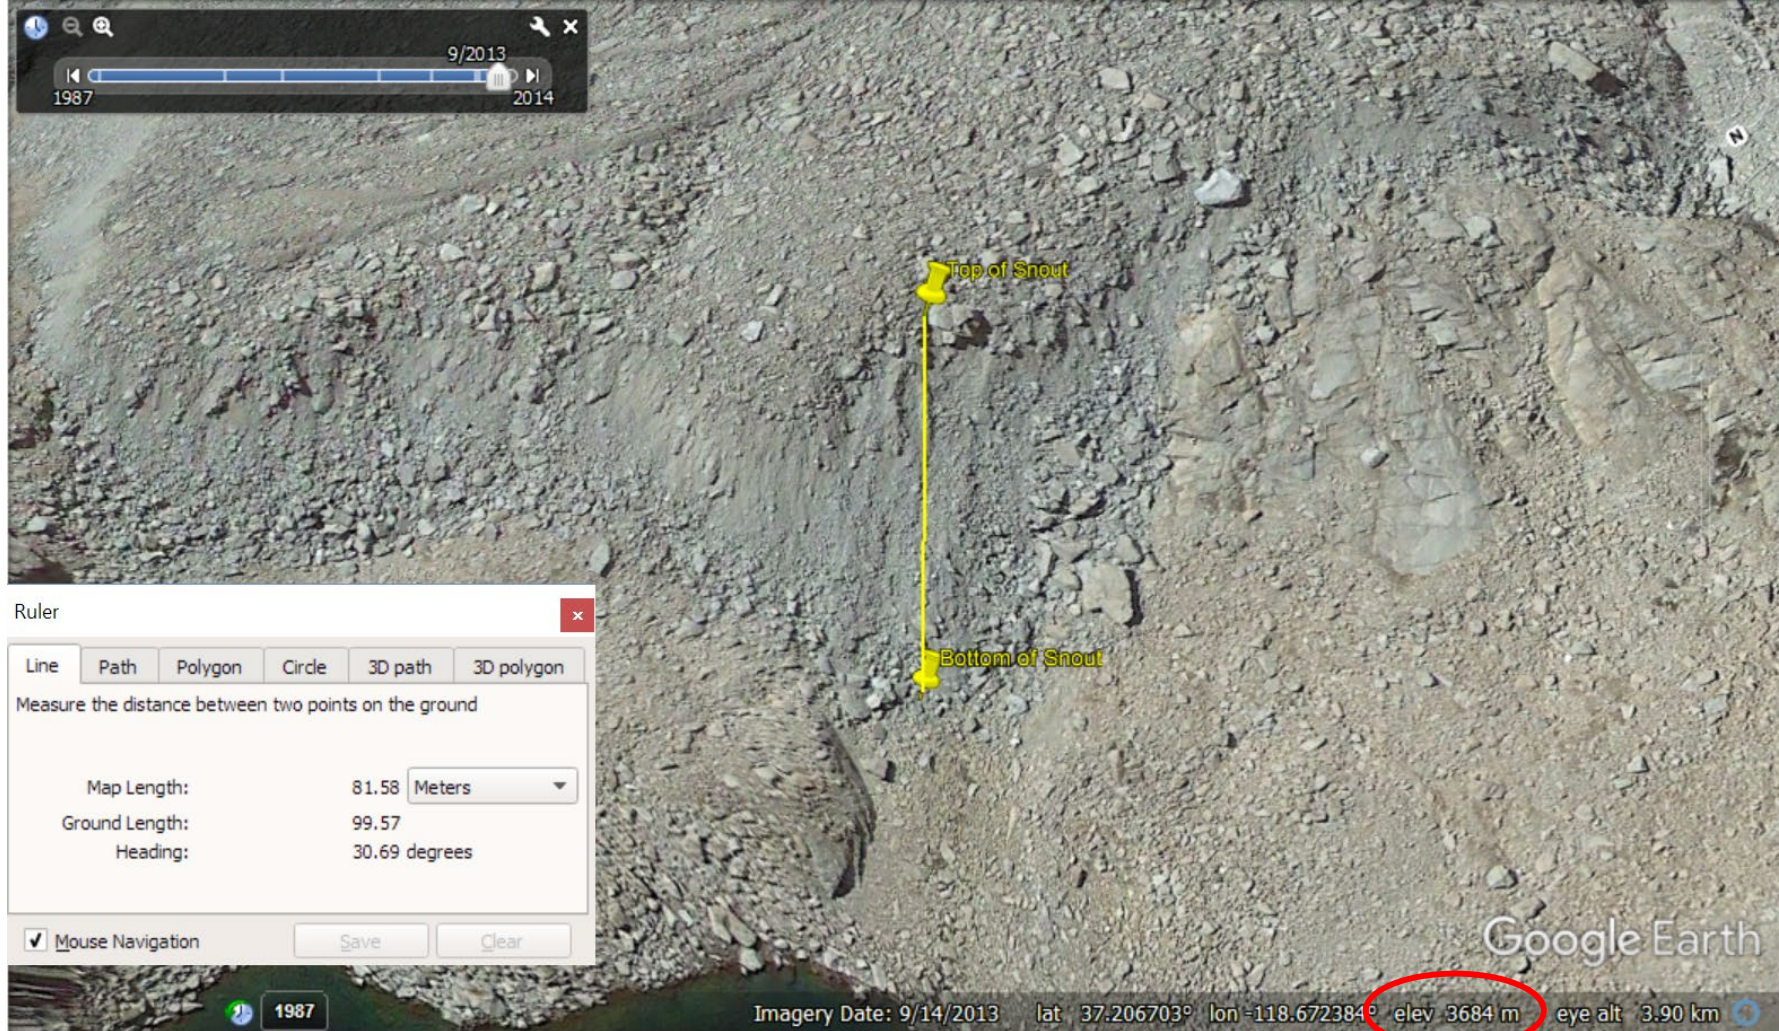

**Figure S1(d)**

### **Estimating Angle of Sky High Rock Glacier Front**

1. Place pins at top and bottom of snout front;
2. Hover cursor over top pin to capture snout-top elevation ( $x^1$ , circled; 3684 m)
3. Repeat at bottom pin for snout-bottom elevation ( $x^2$ ; 3627 m)
4. Use ruler tool in GEP to capture map length between the two points ( $y$ ; 81.58 m)
5. Calculate front angle ( $\theta$ ) as:  $\tan(\theta) = (x^1 - x^2)/y$  ;  
In this example,  $\theta = \tan^{-1}(0.7) = 35^\circ$

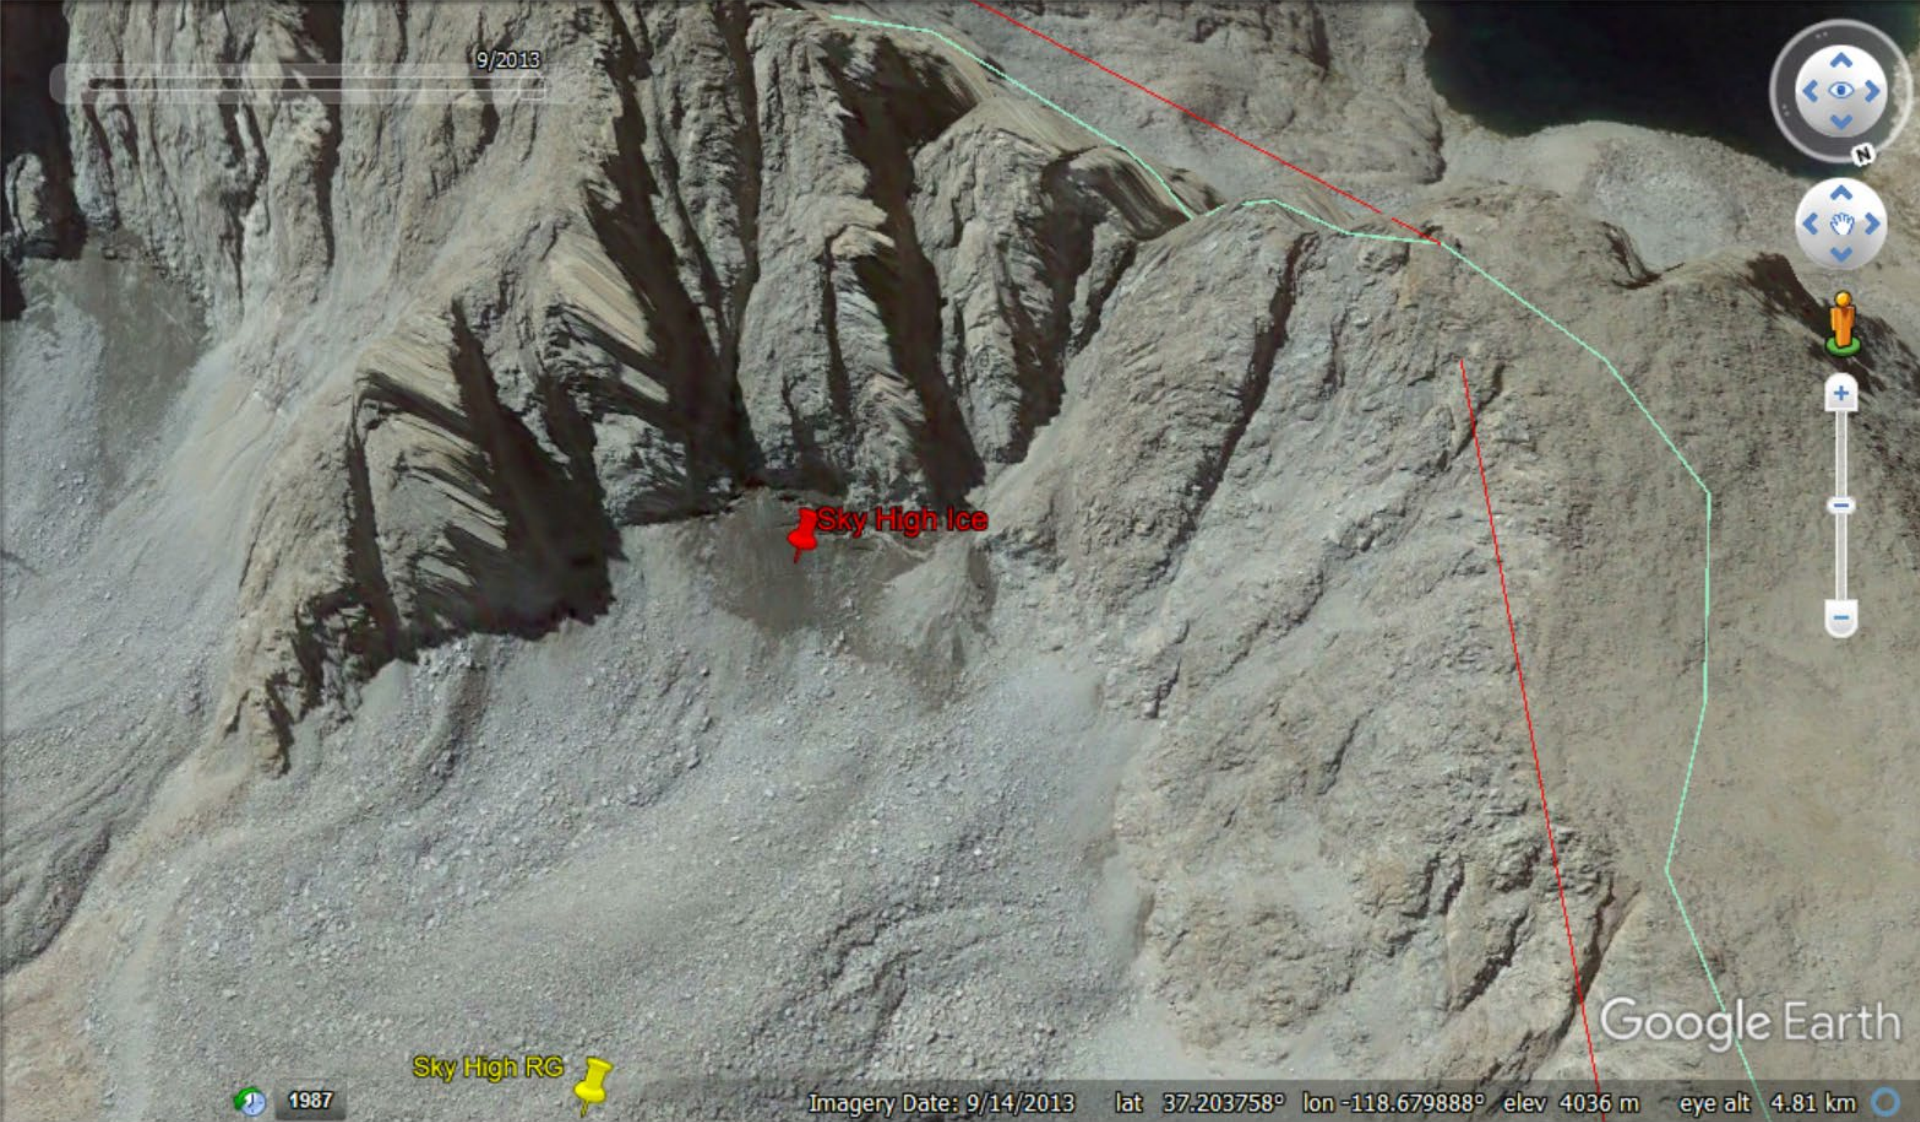

**Figure S1(e)**

**Sky High Icefield, Sierra Nevada, CA above Sky High Rock Glacier**

Red/aqua lines are the crest of the Sierra Nevada and the western hydrographic boundary of the Great Basin.

Sky High Icefield center at red pin:  $37.202932^{\circ}$ ,  $-118.676385^{\circ}$ , 3809 m

GEP Historical Imagery: September 14, 2013

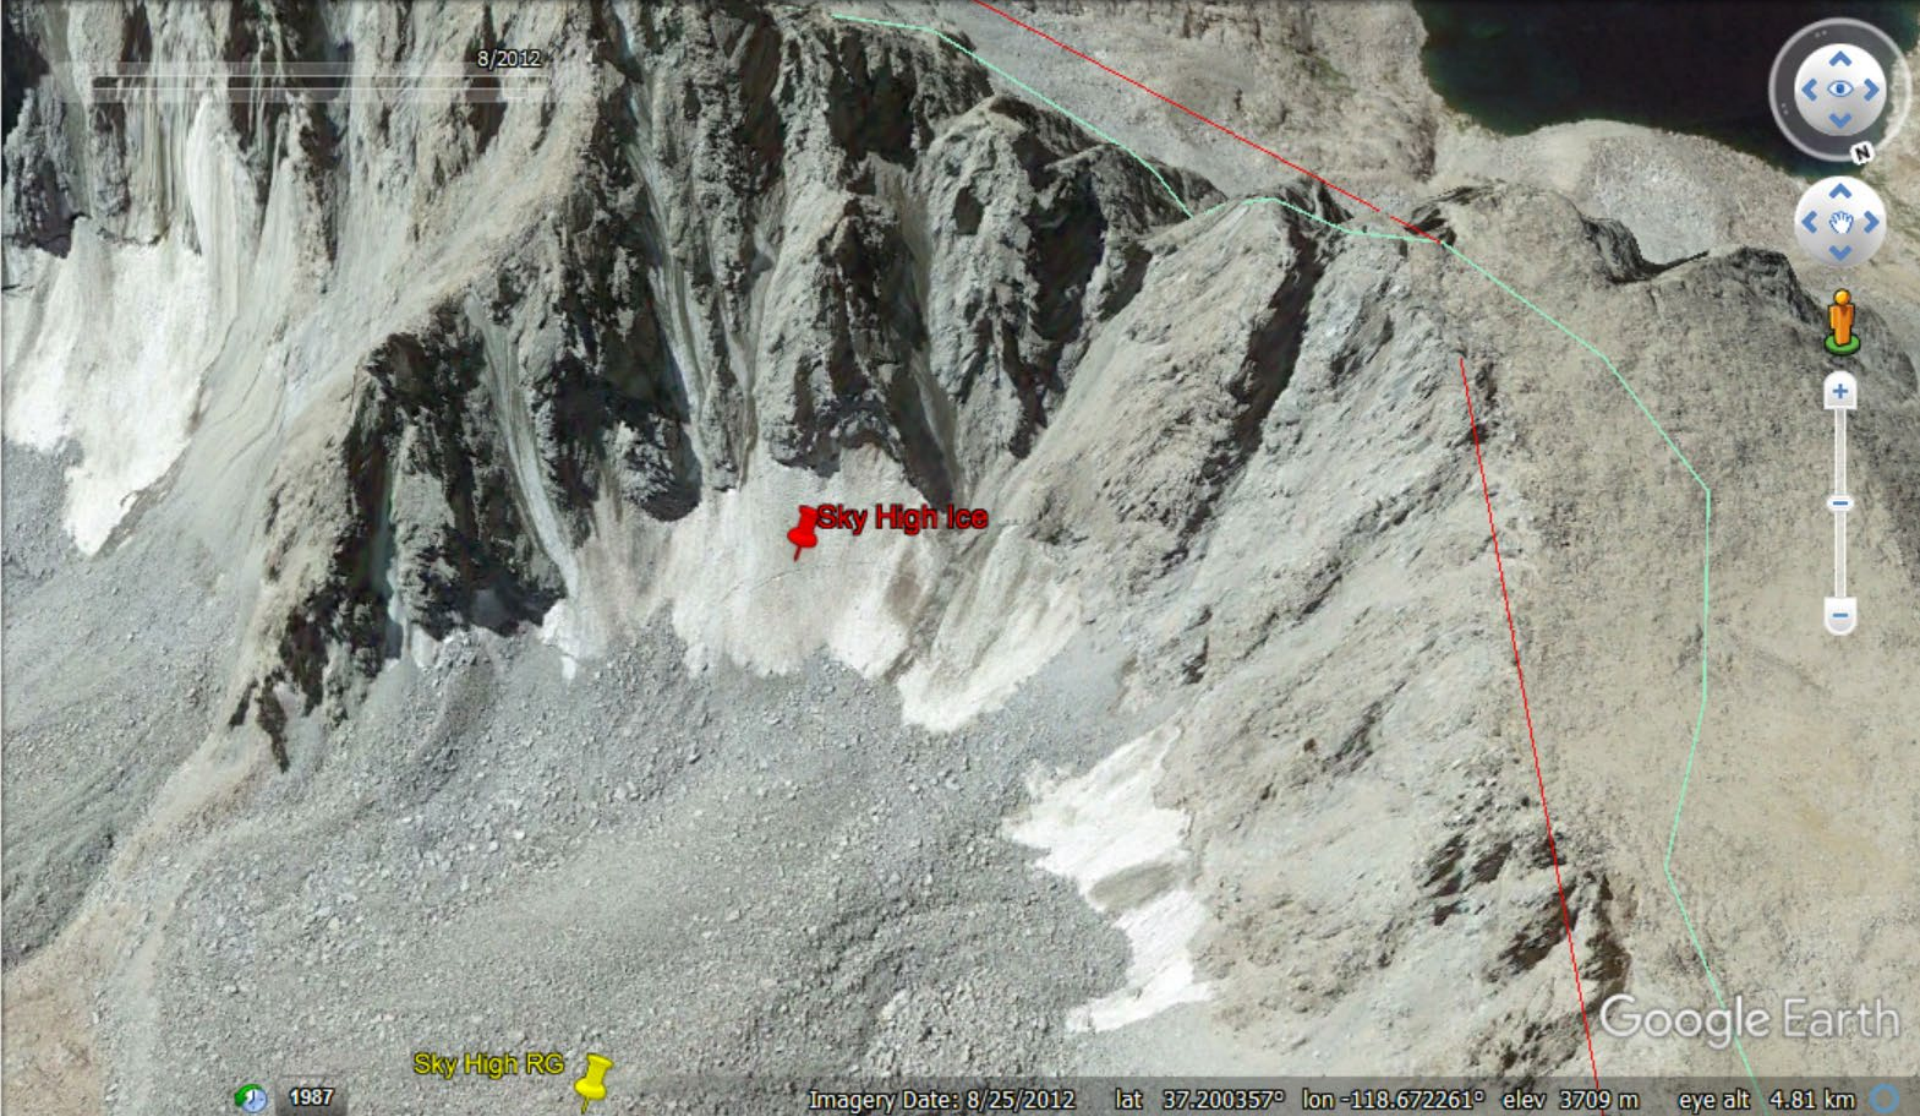

**Figure S1(f)**

**Sky High Icefield, showing more extensive ice historically, even late season in a drought year**  
GEP Historical Imagery: August 25, 2012

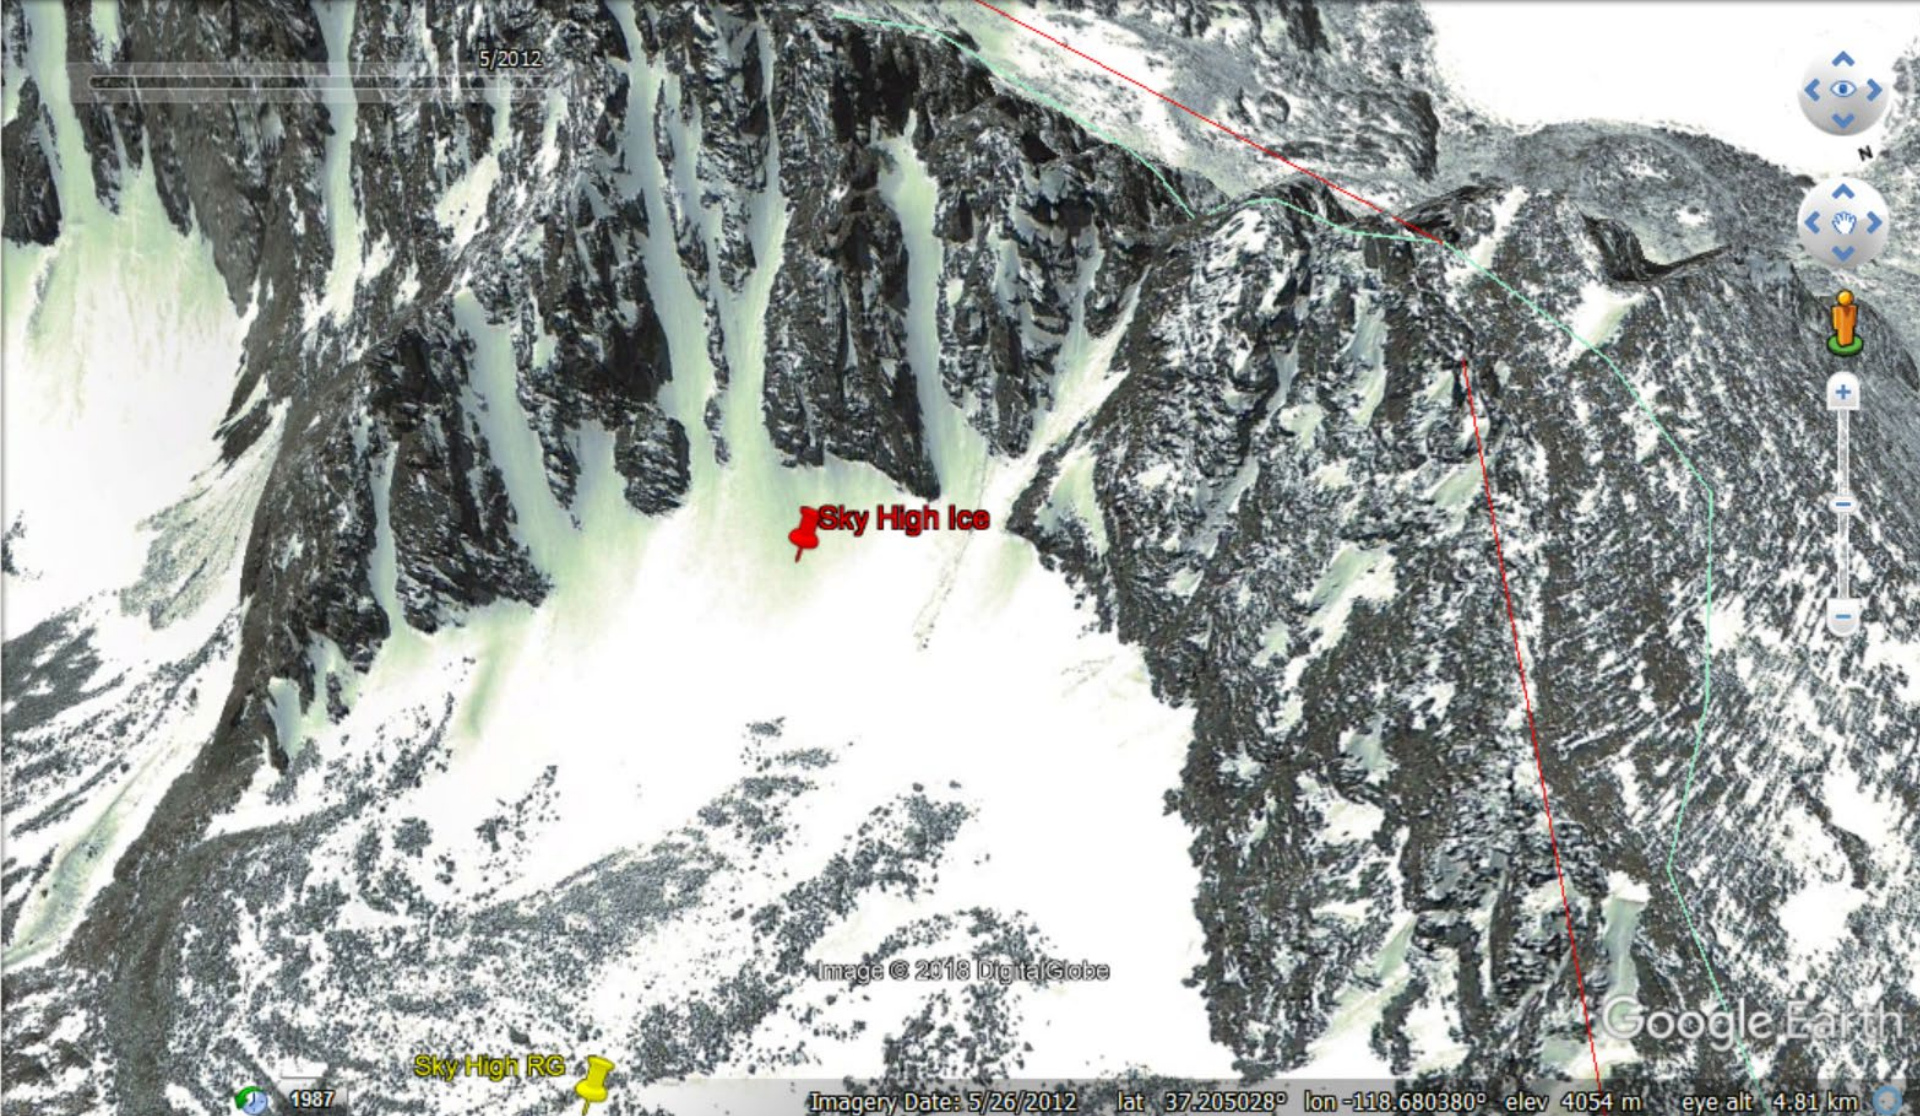

**Figure S1(g)**

**Sky High Icefield, showing snowfield covering ice patches in spring of a dry year**

GEP Historical Imagery: May 26, 2012

Name: Sky High Ice

Description Style, Color View Altitude Measurements

Perimeter: 616 Meters

Area: 1.60 Hectares

OK

Cancel

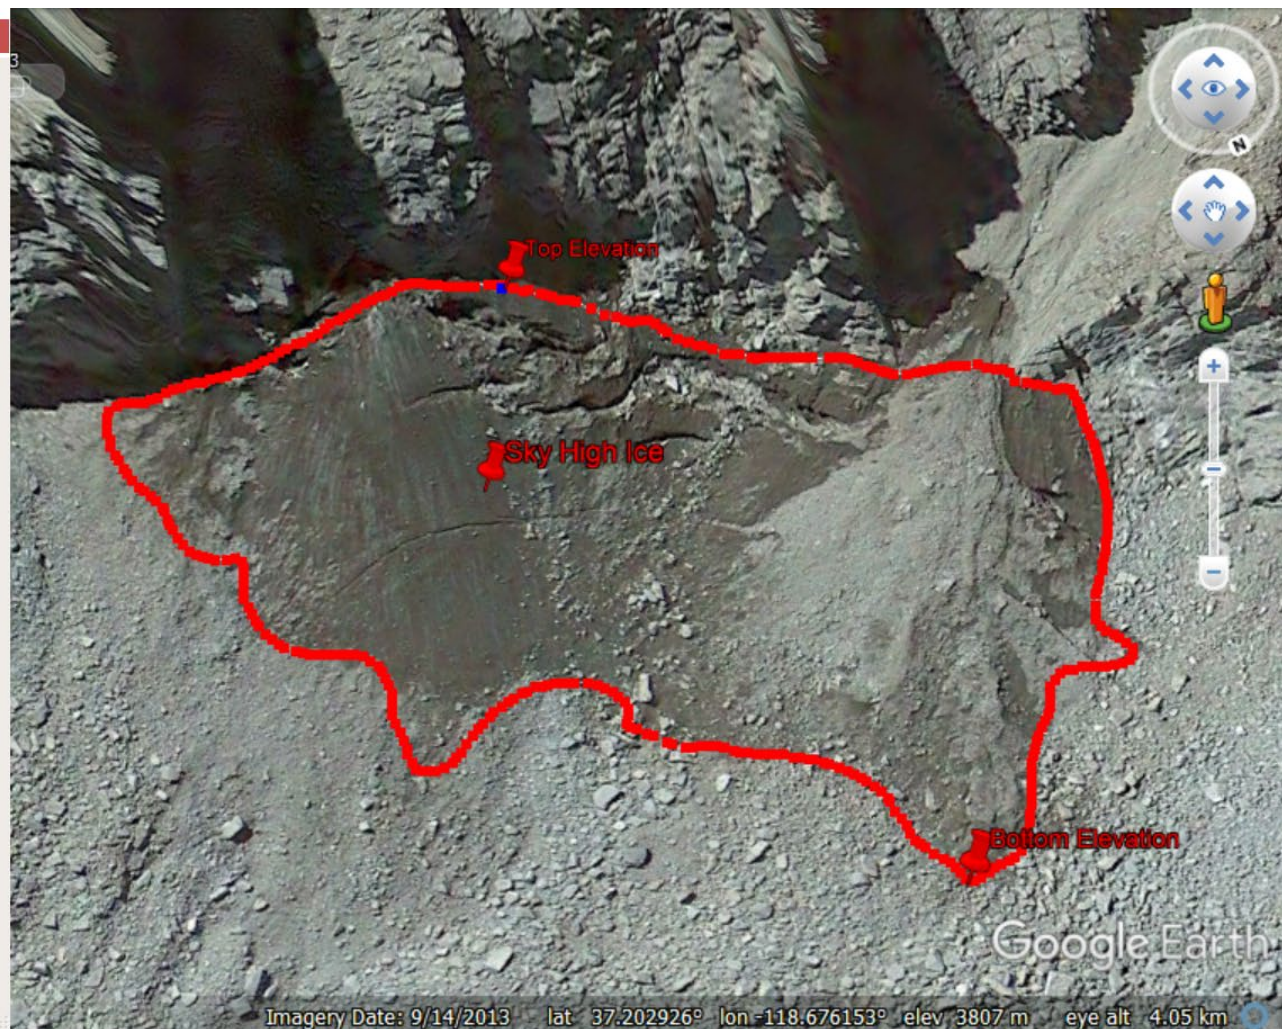

**Figure S1(h)**  
**Sky High Icefield**

Pins at top and bottom of icefield estimate elevations;  
polygon tool in GEP estimates area (1.6 ha);  
Aspect estimated from GEP compass;  
This icefield was tallied as positive for fractures.  
GEP Historical Imagery: September 14, 2013

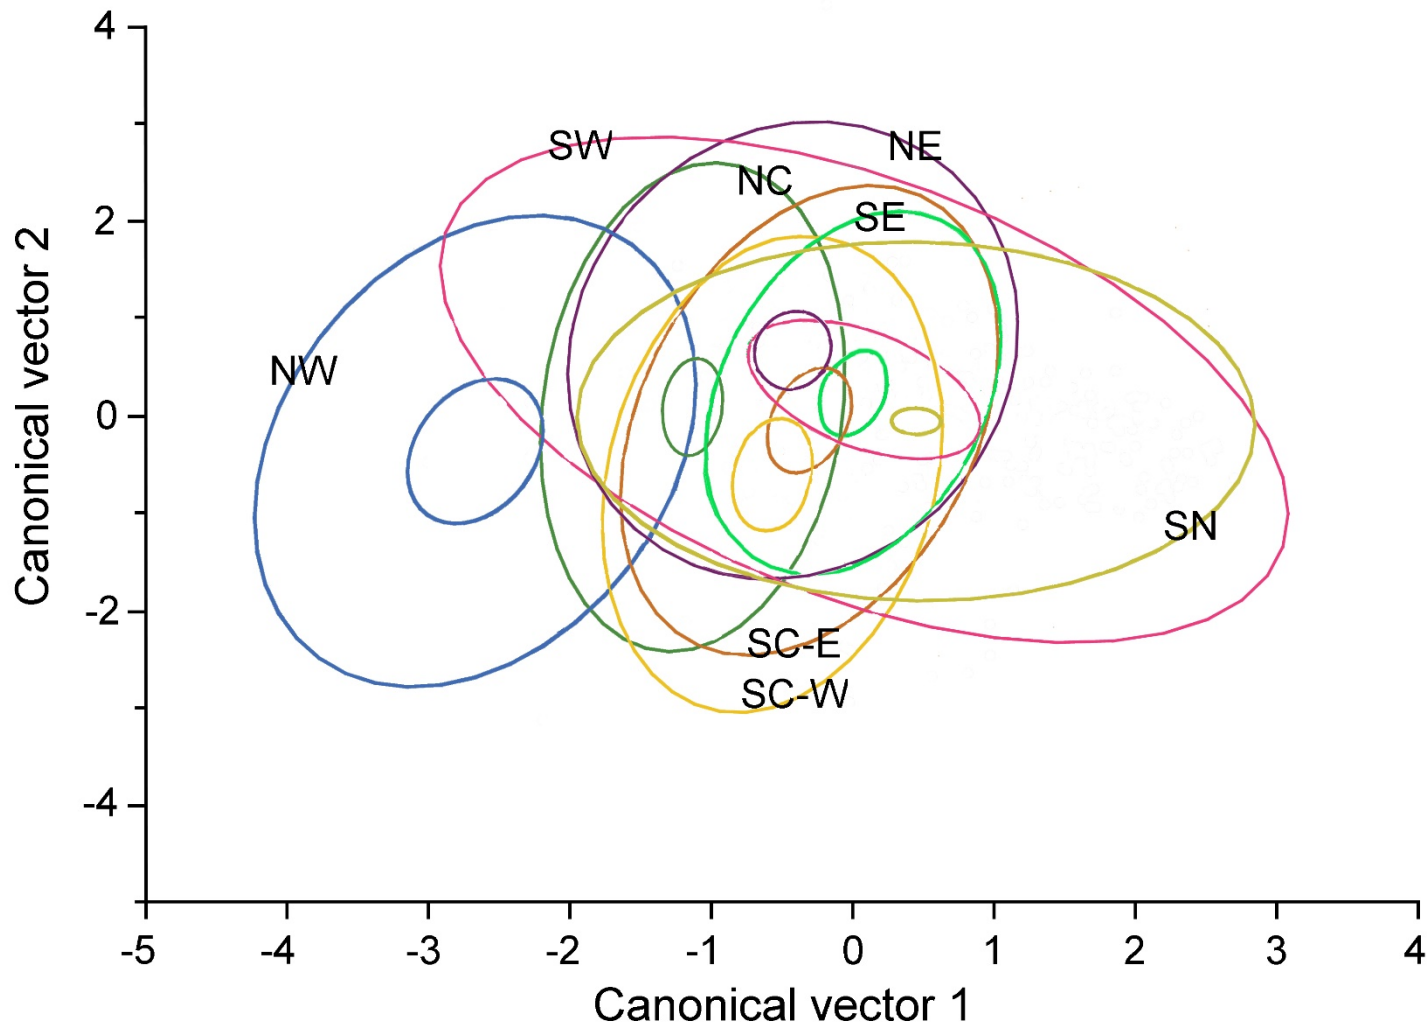

**Supplemental Figure S2:** Discriminant analysis of Great Basin subregions based on rock glacier locations in the hydrographic Great Basin and geographic and geomorphic attributes. Dots are rock glacier sites; overlapping sites are contained in many of the single dots. SN (Sierra Nevada), yellow-green; SW (southwest), purple; NW (northwest), blue; SC-W (south-central west), gold; SC-E (south-central east), brown; NC (north central), dark green; NE (northeast), navy blue; SE (southeast), lime green). Larger ellipsoids indicate 50 percent concentration of the subregional points; smaller (inner) ellipsoids indicate 95 percent confidence intervals of the subregional means.

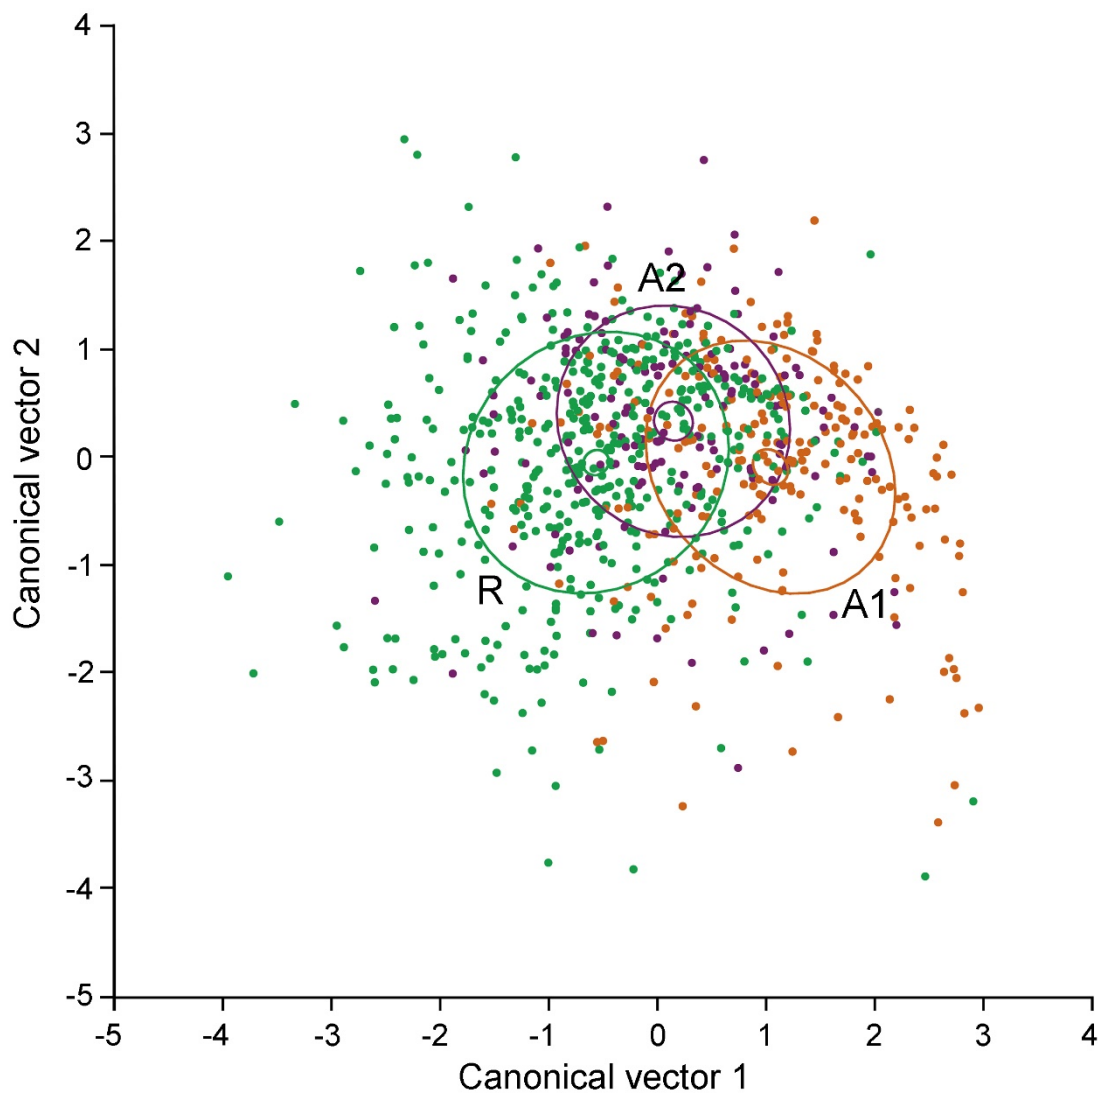

**Supplemental Figure S3:** Discriminant analysis of rock glacier activity class based on locations in the hydrographic Great Basin and geographic and geomorphic attributes. Dots are rock glacier sites; overlapping sites are contained in many of the single dots. Class A1 (active), brown; Class A2 (inactive), purple; Class R (relict), green. Larger ellipsoids indicate 50 percent concentration of the points; smaller (inner) ellipsoids indicate 95 percent confidence intervals of the class means.

**Supplemental Table S1:** Mountain ranges of the Great Basin (GB) assessed for the presence of rock glaciers or persistent icefields and where none was found. For ranges that extend beyond the GB, this is only for the GB portion.

**Mountain Range**

Abert Rim, OR  
Antelope Range, NV  
Bilk Creek Mtns, CA  
Bodie Mountains, CA  
Bruneau Mtns, NV  
Bull Run Mtns, NV  
Cherry Creek Range, NV  
Clan Alpine, NV  
Desatoya Range, NV  
Diamond Mountains, NV  
Duck Creek Range, NV  
Egan Range, NV  
Fox Creek Range, NV  
Grant Range, NV  
Hart Mountains, NV  
Hot Creek Range, NV  
Ichabod Range, NV  
Inyo Mountains, CA  
Kern Mtns, NV  
Oregon Cyn Mtns, CA  
Oquirrh Mountains, UT  
Panamint Range, CA  
Pavant Range, UT  
Pequop Mountains, NV  
Pilot Range, NV  
Pine Grove Hills, NV  
Pine Nut Mtns, NV  
Quinn Cyn Range, NV  
Raft River Mountains, UT  
Santa Rosa Mtns, NV  
Sheepshead Range, OR  
Sherman Pk, UT  
Shoshone Mtns, NV  
Shoshone Range, NV  
Spring Mountains, NV  
Stansbury Range, UT  
Trout Creek Mtns, NV, CA  
Winter Rim, OR

# Supplemental Table S2(a): Rock Glaciers of the Great Basin; version 011619

Millar, C.I. and R.D. Westfall, Geographic, climatic, and hydrologic significance of rock glaciers in the Great Basin, USA.

Submitted for archiving at National Snow and Ice Data Center, Feb 19, 2019

| Sample ID | Mountain Range       | State | Location           | Local Setting                | Feature Type <sup>1</sup> | Coordinates Latitude | Midpoint Longitude | Elev Top (m) | Elev Base (m) | Area (ha) | Aspect | Elev Snout Top (m) | Elev Snout Base (m) | Distance Snout Map (m) | Snout Angle (°) | Furrows Y or N | Condition Class <sup>2</sup> (A1, A2, R) | ForeField Condition <sup>3</sup> Primary Secondary | Field, Map (F, M) | Ice-field Present (Y, N) |   |
|-----------|----------------------|-------|--------------------|------------------------------|---------------------------|----------------------|--------------------|--------------|---------------|-----------|--------|--------------------|---------------------|------------------------|-----------------|----------------|------------------------------------------|----------------------------------------------------|-------------------|--------------------------|---|
| 3         | Bear River Mountains | UT    | Boomington Pk      | South cirque                 | TALC                      | 42.143482            | -111.573476        | 2610         | 2537          | 0.9       | NW     | 2589               | 2551                | 34                     | 48              | N              | A2?                                      | LK                                                 |                   | M                        | N |
| 4         | Bear River Mountains | UT    | Doubletop Mtn      |                              | TALV                      | 41.974685            | -111.655620        | 2811         | 2755          | 3.2       | W      | 2739               | 2739                | 5                      | 7               | N              | R                                        | WM                                                 |                   | M                        | N |
| 17        | Carson Range         | NV    | Freel Peak         | small pocket cirque          | TALC                      | 38.862448            | -119.906376        | 2937         | 2882          | 2.0       | N      | 2907               | 2889                | 33                     | 28              | N              | R                                        | LK                                                 |                   | F, M                     | N |
| 18        | Carson Range         | NV    | Freel Peak         | feature adjacent to GI       | TALC                      | 38.849979            | -119.901284        | 2959         | 2935          | 0.8       | E      | 2957               | 2935                | 49                     | 24              | N              | R                                        | SP                                                 | WM                | F, M                     | N |
| 16        | Carson Range         | NV    | Jobs Peak          | NW slope                     | TALV                      | 38.8683              | -119.857482        | 2580         | 2555          | 0.2       | N      | 2568               | 2566                | 8                      | 16              | N              | R                                        | UV                                                 |                   | F, M                     | N |
| 15        | Carson Range         | NV    | Jobs Sister        | N aspect                     | TALV                      | 38.865341            | -119.881768        | 3083         | 3011          | 2.1       | NW     | 3028               | 3015                | 20                     | 34              | N              | R                                        | UV                                                 |                   | F, M                     | N |
| 11        | Carson Range         | NV    | Relay Pk           | Tahoe Rim Tr; Ginny L        | TALV                      | 39.305881            | -119.951173        | 2837         | 2752          | 4.3       | NW     | 2820               | 2801                | 33                     | 31              | N              | R                                        | WM                                                 |                   | M                        | N |
| 12        | Carson Range         | NV    | Relay Pk           | Along W-SW ridge             | ALV/slurr                 | 39.288858            | -119.985877        | 2832         | 2786          | 1.8       | N      | 2799               | 2791                | 25                     | 17              | N              | R                                        | WM                                                 |                   | M                        | N |
| 13        | Carson Range         | NV    | Relay Pk           | Far W on W-SW ridge          | ALV/slurr                 | 39.279938            | -120.003496        | 2742         | 2704          | 0.7       | N      | 2711               | 2704                | 21                     | 17              | N              | R                                        | UV                                                 |                   | M                        | N |
| 10        | Carson Range         | NV    | S Relay Pk         | Tahoe Rim Trail; Mud         | TALV                      | 39.295367            | -119.959192        | 2820         | 2801          | 0.3       | NW     | 2812               | 2808                | 9                      | 28              | N              | R                                        | WM                                                 |                   | M                        | N |
| 9         | Carson Range         | NV    | Tamarack Pk        | Along Mt Rose Trail          | TALV                      | 39.31655             | -119.914547        | 2843         | 2806          | 1.5       | E      | 2822               | 2806                | 34                     | 25              | N              | R                                        | UV                                                 |                   | F, M                     | N |
| 14        | Carson Range         | NV    | Tamarack Pk        | N near FR 051                | ALV/slurr                 | 39.323658            | -119.930189        | 2877         | 2850          | 0.5       | N      | 2858               | 2858                | 7                      | 5               | N              | R                                        | WM                                                 |                   | M                        | N |
| 21        | Copper Mountains     | NV    | Copper Crest       | Cirque of High Pt            | TALV                      | 41.792728            | -115.517583        | 2818         | 2743          | 1.6       | N      | 2840               | 2805                | 46                     | 37              | N              | R                                        | UV                                                 |                   | F, M                     | N |
| 23        | Deep Creek Mountains | UT    | Haystack Pk        | E cirque                     | TALC                      | 39.850787            | -113.897611        | 3347         | 3278          | 2.2       | E      | 3316               | 3280                | 52                     | 35              | N              | R                                        | UV                                                 |                   | M                        | N |
| 24        | Deep Creek Mountains | UT    | Haystack Pk        | E cirque                     | TALC                      | 39.848445            | -113.894129        | 3259         | 3204          | 1.5       | N      | 3254               | 3231                | 67                     | 19              | N              | R                                        | UV                                                 |                   | M                        | N |
| 25        | Deep Creek Mountains | UT    | Haystack Pk        | NW cirque                    | TALC                      | 39.846009            | -113.915016        | 3245         | 3073          | 5.9       | NW     | 3206               | 3160                | 66                     | 35              | N              | R                                        | WM                                                 |                   | M                        | N |
| 26        | Deep Creek Mountains | UT    | Ibahpah Pk         | NE cirque                    | TALV                      | 39.830356            | -113.907225        | 3274         | 3155          | 2.5       | N      | 3190               | 3180                | 32                     | 18              | N              | R                                        | UV                                                 |                   | M                        | N |
| 27        | Deep Creek Mountains | UT    | Red Mtn            | NE cirque                    | TALV                      | 39.806428            | -113.923042        | 2852         | 2802          | 1.5       | N      | 2845               | 2841                | 17                     | 15              | Y              | R                                        | AS                                                 |                   | M                        | N |
| 28        | Deep Creek Mountains | UT    | Red Mtn            | NW cirque                    | TALV                      | 39.80215             | -113.946009        | 3178         | 3156          | 0.1       | NNW    | 3173               | 3156                | 19                     | 41              | N              | R                                        | RK                                                 |                   | M                        | N |
| 29        | Deep Creek Mountains | UT    | Red Mtn            | Crest several south          | TALV                      | 39.779028            | -113.958488        | 3076         | 3013          | 0.8       | NE     | 3019               | 3008                | 18                     | 30              | Y?             | R                                        | UV                                                 |                   | M                        | N |
| 32        | East Humboldt Range  | NV    | Greys Pk           | North face Nmost ridge       | RGC                       | 41.039408            | -115.098375        | 2807         | 2675          | 3.3       | N      | 2729               | 2684                | 64                     | 35              | N              | A2                                       | SH                                                 |                   | M                        | N |
| 33        | East Humboldt Range  | NV    | Greys Pk           | North face Nmost ridge slump | RGC                       | 41.035846            | -115.102784        | 2868         | 2830          | 0.6       | N      | 2862               | 2829                | 70                     | 25              | N              | R                                        | SH                                                 |                   | M                        | N |
| 34        | East Humboldt Range  | NV    | Greys Pk           | Smith Lk Cyn                 | TALC                      | 41.032236            | -115.094970        | 2819         | 2776          | 1.5       | N      | 2795               | 2774                | 36                     | 30              | N              | R                                        | LK                                                 |                   | F, M                     | N |
| 36        | East Humboldt Range  | NV    | HoleintheWall Pk   | S cirque                     | TALC                      | 40.926508            | -115.110887        | 2892         | 2860          | 1.6       | NW     | 2870               | 2856                | 45                     | 17              | N              | R                                        | LK                                                 |                   | M                        | N |
| 37        | East Humboldt Range  | NV    | HoleintheWall Pk   | N cirque                     | RGC                       | 40.956076            | -115.121186        | 3051         | 3032          | 5.7       | N      | 3060               | 3048                | 38                     | 17              | Y              | A1                                       | SH                                                 | LK                | M                        | Y |
| 42        | East Humboldt Range  | NV    | HoleintheWall Pk   | South along crest from       | TALV                      | 40.927573            | -115.130875        | 3068         | 3030          | 1.5       | NW     | 3047               | 3032                | 27                     | 29              | N              | R                                        | SH                                                 | RK                | M                        | N |
| 41        | East Humboldt Range  | NV    | Humboldt Pk        | Along E ridge                | TALV                      | 40.899613            | -115.107180        | 2968         | 2801          | 9.8       | WNW    | 2897               | 2887                | 24                     | 21              | N              | A2                                       | WM                                                 | SH                | M                        | Y |
| 40        | East Humboldt Range  | NV    | S of Chimney Rk    | Main crest                   | TALC                      | 41.007488            | -115.099216        | 2919         | 2888          | 0.7       | NE     | 2900               | 2891                | 22                     | 22              | N              | R                                        | RK                                                 | SH                | M                        | Y |
| 35        | East Humboldt Range  | NV    | S of Greys Pk      | Below Winchell Lk            | TALV?                     | 40.985099            | -115.091202        | 2611         | 2583          | 0.9       | E      | 2607               | 2580                | 41                     | 33              | N              | R                                        | SH                                                 |                   | M                        | N |
| 39        | East Humboldt Range  | NV    | S of Greys Pk      | Chimney Rock                 | RGC                       | 41.016035            | -115.100889        | 3036         | 3014          | 1.7       | NE     | 3028               | 3020                | 21                     | 20              | N              | R                                        | RK                                                 |                   | M                        | Y |
| 38        | East Humboldt Range  | NV    | S of HoleInWall Pk | Steele Lk cirque             | TALC                      | 40.91397             | -115.113096        | 2938         | 2913          | 0.7       | N      | 2934               | 2913                | 38                     | 30              | Y              | R                                        | LK                                                 |                   | M                        | N |
| 44        | Fish Lake Mountains  | UT    | Flat Top           | Cyn1-1                       | TALC                      | 38.587655            | -111.761613        | 3175         | 3110          | 1.4       | SW     | 3135               | 3115                | 34                     | 32              | N              | A2                                       | UV                                                 |                   | M                        | N |
| 45        | Fish Lake Mountains  | UT    | Flat Top           | Cyn1-2                       | TALC                      | 38.584961            | -111.761570        | 3178         | 3087          | 1.2       | NW     | 3136               | 3131                | 14                     | 21              | Y              | R                                        | LK                                                 | WM                | M                        | N |
| 46        | Fish Lake Mountains  | UT    | Flat Top           | Cyn1-3                       | TALV                      | 38.590831            | -111.749673        | 3363         | 3332          | 2.2       | S      | 3346               | 3336                | 24                     | 24              | N              | R                                        | WM                                                 |                   | M                        | N |
| 47        | Fish Lake Mountains  | UT    | Flat Top           | Cyn2-1                       | TALV                      | 38.603625            | -111.758042        | 3047         | 3001          | 1.3       | W      | 3004               | 3002                | 9                      | 13              | Y              | R                                        | UV                                                 |                   | M                        | N |

|    |                     |    |                             |                    |       |           |             |      |      |      |         |      |      |     |    |   |    |    |    |      |   |
|----|---------------------|----|-----------------------------|--------------------|-------|-----------|-------------|------|------|------|---------|------|------|-----|----|---|----|----|----|------|---|
| 48 | Fish Lake Mountains | UT | Flat Top                    | Cyn2-2             | TALV  | 38.603081 | -111.755426 | 3129 | 3066 | 1.3  | N       | 3093 | 3090 | 7   | 27 | N | R  | UV |    | M    | N |
| 49 | Fish Lake Mountains | UT | Flat Top                    | Cyn2-3             | TALV  | 38.603744 | -111.751675 | 3200 | 3149 | 1.4  | W       | 3184 | 3179 | 23  | 13 | N | R  | UV |    | M    | N |
| 50 | Fish Lake Mountains | UT | Flat Top                    | Cyn3-1             | RGC   | 38.631858 | -111.727583 | 3222 | 3147 | 5.8  | NE      | 3188 | 3176 | 27  | 24 | Y | R  | SH | UV | M    | N |
| 51 | Fish Lake Mountains | UT | Flat Top                    | Cyn4-1             | TALV  | 38.646778 | -111.714337 | 3375 | 3328 | 3.5  | W       | 3334 | 3328 | 10  | 28 | N | R  | SH |    | M    | N |
| 52 | Fish Lake Mountains | UT | Flat Top                    | Cyn4-2             | TALV  | 38.649177 | -111.718345 | 3265 | 3085 | 14.4 | W       | 3229 | 3225 | 12  | 19 | N | R  | SH | WM | M    | N |
| 53 | Fish Lake Mountains | UT | Flat Top                    | Plateau-1          | TALV  | 38.667155 | -111.704105 | 3295 | 3267 | 0.1  | ENE     | 3288 | 3285 | 7   | 21 | N | R  | UV |    | M    | N |
| 54 | Fish Lake Mountains | UT | Flat Top                    | Plateau-2          | TALV  | 38.675912 | -111.694216 | 3215 | 3161 | 0.7  | NE      | 3168 | 3166 | 6   | 23 | N | R  | SH | AS | M    | N |
| 55 | Fish Lake Mountains | UT | Flat Top                    | NE Cirque-1        | RGC   | 38.660724 | -111.697928 | 3249 | 3122 | 21.3 | NE      | 3183 | 3173 | 17  | 30 | Y | R  | SH | UV | M    | N |
| 56 | Fish Lake Mountains | UT | Flat Top                    | E Cirque-2         | RGC   | 38.652976 | -111.692774 | 3235 | 3043 | 15.5 | E       | 3050 | 3046 | 8   | 26 | Y | R  | UV |    | M    | N |
| 57 | Fish Lake Mountains | UT | Flat Top                    | E Cirque-3         | RGC   | 38.64591  | -111.695612 | 3299 | 3082 | 61.4 | N       | 3139 | 3135 | 20  | 13 | Y | A2 | UV | SH | M    | N |
| 58 | Fish Lake Mountains | UT | Flat Top                    | E Cirque-3         | RGC   | 38.64741  | -111.698678 | 3300 | 3144 | 27.4 | E       | 3216 | 3205 | 46  | 13 | Y | R  | UV | WM | M    | N |
| 59 | Fish Lake Mountains | UT | Flat Top                    | E Cirque-3         | RGC   | 38.648059 | -111.692666 | 3147 | 3090 | 5.6  | NE      | 3126 | 3114 | 20  | 31 | Y | R  | UV | WM | M    | N |
| 60 | Fish Lake Mountains | UT | Flat Top                    | E Cirque-3         | RGC   | 38.641349 | -111.690325 | 3224 | 3114 | 7.5  | NE      | 3151 | 3121 | 55  | 29 | Y | R  | UV |    | M    | N |
| 61 | Fish Lake Mountains | UT | Flat Top                    | E Cirque-3         | RGC   | 38.643856 | -111.689436 | 3160 | 3121 | 1.0  | E       | 3136 | 3125 | 20  | 29 | Y | R  | UV | UV | M    | N |
| 62 | Fish Lake Mountains | UT | Flat Top                    | E Cirque-4         | TALV  | 38.630146 | -111.685901 | 3126 | 3001 | 13.6 | NE      | 3071 | 3043 | 58  | 26 | Y | A2 | LK | UV | M    | N |
| 63 | Fish Lake Mountains | UT | Flat Top                    | E Cirque-4         | TALV  | 38.629078 | -111.689127 | 3125 | 3072 | 5.5  | S       | 3099 | 3075 | 42  | 30 | Y | R  | WM | UV | M    | N |
| 64 | Fish Lake Mountains | UT | Flat Top                    | E Cirque-4         | TALV  | 38.628605 | -111.693063 | 3176 | 3100 | 8.0  | SE      | 3109 | 3104 | 23  | 13 | Y | R  | WM | UV | M    | N |
| 65 | Fish Lake Mountains | UT | Flat Top                    | E Cirque-4         | TALV  | 38.628053 | -111.696174 | 3210 | 3125 | 3.9  | S       | 3167 | 3137 | 46  | 32 | Y | R  | WM | UV | M    | N |
| 66 | Fish Lake Mountains | UT | Flat Top                    | E Cirque-4         | TALV  | 38.6302   | -111.701237 | 3272 | 3192 | 3.2  | SW      | 3232 | 3217 | 41  | 21 | N | R  | WM | UV | M    | N |
| 67 | Fish Lake Mountains | UT | Flat Top                    | E Cirque-4         | TALV  | 38.625291 | -111.684885 | 3076 | 3035 | 5.4  | N       | 3041 | 3031 | 23  | 23 | N | R  | WM | UV | M    | N |
| 68 | Fish Lake Mountains | UT | Flat Top                    | E Cirque-4         | TALV  | 38.626956 | -111.678997 | 3040 | 2981 | 3.6  | NE      | 3005 | 2982 | 40  | 30 | N | R  | WM | UV | M    | N |
| 69 | Fish Lake Mountains | UT | Flat Top                    | E Cirque-5         | TALC  | 38.598927 | -111.699490 | 3039 | 2928 | 8.4  | SE      | 2979 | 2969 | 23  | 24 | N | Y  | UV |    | M    | N |
| 70 | Fish Lake Mountains | UT | Flat Top                    | E Cirque-5         | TALV  | 38.591087 | -111.704675 | 3085 | 3003 | 2.3  | SSE     | 3031 | 3003 | 29  | 44 | N | R  | UV |    | M    | N |
| 71 | Fish Lake Mountains | UT | Flat Top                    | E Cirque-6         | TALC  | 38.576975 | -111.717315 | 3067 | 2947 | 7.1  | ESE     | 2976 | 2975 | 7   | 10 | Y | R  | UV |    | M    | N |
| 72 | Fish Lake Mountains | UT | Flat Top                    | E Cirque-6         | TALV  | 38.587713 | -111.726526 | 3317 | 3213 | 2.5  | W       | 3289 | 3284 | 14  | 22 | N | R  | UV |    | M    | N |
| 73 | Fish Lake Mountains | UT | Mt Terrill                  | E face             | TALV  | 38.704099 | -111.643968 | 3302 | 3191 | 29.5 | E       | 3281 | 3265 | 29  | 30 | Y | R  | WM | UV | M    | N |
| 74 | Fish Lake Mountains | UT | Mt Terrill                  | E face             | TALV  | 38.720858 | -111.640064 | 3316 | 3233 | 4.7  | NE      | 3245 | 3235 | 18  | 29 | Y | R  | WM | SH | M    | N |
| 75 | Fish Lake Mountains | UT | Mt Terrill                  | E face             | TALC  | 38.720996 | -111.649661 | 3427 | 3293 | 29.3 | NE      | 3335 | 3330 | 20  | 14 | Y | R  | WM |    | M    | N |
| 81 | Independence Mtns   | NV | Jacks Peak                  | Cirque to NW of Pk | TALV  | 41.50297  | -116.017257 | 2716 | 2598 | 6.0  | NW      | 2624 | 2608 | 30  | 28 | N | R  | RK |    | M    | N |
| 83 | Jarbridge Range     | NV | Crest NE fr Mary's River Pk |                    | TALV  | 41.7671   | -115.351037 | 2904 | 2700 | 3.7  | W       | 2780 | 2776 | 34  | 7  | N | R  | UV |    | F, M | N |
| 84 | Jarbridge Range     | NV | Jarbridge Crest             | Cougar Pk          | RGC   | 41.796102 | -115.367646 | 3006 | 2882 | 5.8  | N       | 2917 | 2899 | 29  | 32 | N | A1 | WM |    | M    | Y |
| 85 | Jarbridge Range     | NV | Jarbridge Crest             | Cougar Pk          | RGC   | 41.798603 | -115.368168 | 2892 | 2800 | 8.0  | n       | 2811 | 2805 | 26  | 12 | Y | A2 | WM |    | M    | N |
| 86 | Jarbridge Range     | NV | Jarbridge Crest             | N of Cougar Pk     | RGC   | 41.798224 | -115.371441 | 2958 | 2843 | 9.0  | NE      | 2879 | 2843 | 73  | 26 | N | A2 | WM |    | M    | N |
| 87 | Jarbridge Range     | NV | Jarbridge Crest             | N of Cougar Pk     | TALV  | 41.798158 | -115.372351 | 3007 | 2843 | 7.9  | NE      | 2933 | 2901 | 110 | 16 | N | A2 | WM |    | F, M | N |
| 88 | Jarbridge Range     | NV | Jarbridge Crest             | N of Cougar Pk     | TALV? | 41.806163 | -115.371427 | 3038 | 3028 | 0.2  | N       | 3023 | 3000 | 67  | 19 | N | R  | LK |    | M    | N |
| 89 | Jarbridge Range     | NV | Jarbridge Crest             | Matterhorn Pk      | RGC   | 41.81405  | -115.374249 | 3101 | 2892 | 13.4 | N to NE | 2905 | 2895 | 25  | 22 | Y | A2 | UV |    | M    | Y |
| 90 | Jarbridge Range     | NV | Jarbridge Crest             | Matterhorn Pk      | TALV  | 41.817317 | -115.364956 | 2892 | 2743 | 6.9  | N       | 2847 | 2841 | 25  | 14 | N | R  | UV |    | M    | N |
| 91 | Jarbridge Range     | NV | Jarbridge Crest             | Matterhorn Pk      | TALC  | 41.818526 | -115.371936 | 2977 | 2889 | 3.9  | S       | 2940 | 2930 | 25  | 23 | N | R  | UV |    | M    | N |
| 92 | Jarbridge Range     | NV | Jarbridge Crest             | Square Top - SE    | TALC  | 41.821162 | -115.375447 | 3070 | 3025 | 1.4  | NE      | 3029 | 3025 | 14  | 17 | N | A1 | LK |    | M    | Y |
| 93 | Jarbridge Range     | NV | Jarbridge Crest             | Square Top - NE    | TALC  | 41.826577 | -115.376987 | 2949 | 2879 | 2.0  | N       | 2907 | 2899 | 30  | 16 | N | A2 | WM |    | M    | Y |
| 94 | Jarbridge Range     | NV | Jarbridge Crest             | Square Top - NE    | TALC  | 41.826137 | -115.381519 | 2970 | 2966 | 2.0  | N       | 2985 | 2964 | 19  | 48 | N | A2 | RK |    | M    | Y |
| 95 | Jarbridge Range     | NV | Jarbridge Crest             | Jumbo - SE         | RGC   | 41.830662 | -115.376145 | 2911 | 2838 | 5.1  | E       | 2876 | 2875 | 7   | 12 | N | R  | WM |    | M    | N |
| 96 | Jarbridge Range     | NV | Jarbridge Crest             | Square Top - NE    | TALV  | 41.829904 | -115.369626 | 2872 | 2612 | 16.0 | N       | 2710 | 2706 | 15  | 14 | N | R  | UV |    | M    | N |
| 97 | Jarbridge Range     | NV | Jarbridge Crest             | Jumbo - NE         | RGC   | 41.833769 | -115.383864 | 3081 | 2961 | 10.8 | N       | 3027 | 2961 | 160 | 22 | Y | A1 | LK |    | F, M | Y |

|     |                      |    |                 |                         |            |           |             |      |      |      |     |      |      |    |    |    |    |    |    |      |   |
|-----|----------------------|----|-----------------|-------------------------|------------|-----------|-------------|------|------|------|-----|------|------|----|----|----|----|----|----|------|---|
| 98  | Jarbridge Range      | NV | Jarbridge Crest | Jumbo - NE              | RGC        | 41.836785 | -115.383825 | 3053 | 2961 | 5.8  | SE  | 2985 | 2968 | 46 | 20 | Y? | A2 | LK |    | M    | N |
| 99  | Jarbridge Range      | NV | Jarbridge Crest | Jarbridge Pk - NE       | TALV       | 41.843294 | -115.385157 | 3046 | 2996 | 2.9  | N   | 3012 | 2997 | 49 | 17 | N  | A2 | UV |    | F, M | Y |
| 100 | Jarbridge Range      | NV | Jarbridge Crest | Jarbridge Pk - N cirque | TALV       | 41.851824 | -115.390779 | 2895 | 2858 | 2.3  | E   | 2884 | 2869 | 30 | 26 | N  | A2 | UV |    | F, M | Y |
| 101 | Jarbridge Range      | NV | Jarbridge Crest | Jarbridge Pk            | TALV       | 41.857324 | -115.395710 | 2903 | 2776 | 5.2  | E   | 2847 | 2839 | 27 | 16 | N  | A2 | UV |    | F, M | N |
| 102 | Jarbridge Range      | NV | Jarbridge Crest | Jarbridge Pk - NE       | TALV       | 41.867476 | -115.382777 | 2585 | 2502 | 5.3  | N   | 2539 | 2512 | 60 | 24 | N  | A2 | UV |    | F, M | N |
| 103 | Jarbridge Range      | NV | Jarbridge Crest | Jarbridge Pk - NE       | TALV       | 41.858014 | -115.389473 | 2835 | 2764 | 2.2  | ESE | 2778 | 2770 | 22 | 18 | N  | R  | WM |    | F, M | N |
| 104 | Jarbridge Range      | NV | Jarbridge Crest | Jarbridge Pk - N cirque | TALV       | 41.847008 | -115.388026 | 2989 | 2893 | 7.1  | NE  | 2983 | 2967 | 39 | 23 | N  | A2 | RK |    | F, M | Y |
| 876 | Markagunt Plateau    | UT | Brian Head      | N and E of BH           | TALV       | 37.685081 | -112.828753 | 3328 | 3267 | 5.2  | NW  | 3322 | 3307 | 31 | 26 | N  | R  | WM | SH | M    | N |
| 877 | Markagunt Plateau    | UT | Sydney Pks      | NW #1                   | TALV       | 37.70553  | -112.799138 | 3171 | 3148 | 1.9  | NW  | 3166 | 3157 | 28 | 18 | N  | R  | WM | SH | M    | N |
| 878 | Markagunt Plateau    | UT | Sydney Pks      | NW #2                   | TALV       | 37.711215 | -112.795773 | 3100 | 3024 | 2.3  | NW  | 3083 | 3081 | 8  | 16 | N  | R  | WM | UV | M    | N |
| 106 | Marys River Mtns     | NV | Mary's River Pk | Cirque on N             | TALC       | 41.763657 | -115.358318 | 2936 | 2911 | 0.4  | N   | 2917 | 2914 | 13 | 9  | N  | R  | RK |    | F, M | N |
| 107 | Monitor Range        | NV | Table Mtn       | 3rd cirque S of Table S | TALC       | 38.790776 | -116.583945 | 3184 | 3162 | 0.3  | NE  | 3177 | 3169 | 20 | 22 | N  | R  | UV |    | F, M | N |
| 108 | Monitor Range        | NV | Table Mtn       | 2nd cirque S of Table S | TALV/slurr | 38.796716 | -116.581318 | 3157 | 3144 | 0.3  | ENE | 3146 | 3140 | 12 | 25 | N  | R  | UV |    | F, M | N |
| 109 | Monitor Range        | NV | Table Mtn       | Clear Lk Cirque         | TALC/slurr | 38.814877 | -116.589356 | 3194 | 3143 | 1.9  | NE  | 3174 | 3154 | 38 | 27 | N  | R  | LK |    | F, M | N |
| 879 | North Toiyabe Range  | NV | Mt Callaghan    | S Fk Skull Cr           | RGC        | 39.715598 | -116.944192 | 2886 | 2836 | 7.0  | N   | 2868 | 2843 | 80 | 18 | N  | R  | UV |    | M    | N |
| 116 | Pine Forest Range    | NV | Duffer Pk       | Blue Lks Cirque         | TALC       | 41.676849 | -118.713640 | 2549 | 2481 | 0.9  | N   | 2490 | 2484 | 16 | 20 | N  | R  | LK |    | F, M | N |
| 117 | Pine Forest Range    | NV | Duffer Pk       | Blue Lks Cirque         | TALC       | 41.677026 | -118.716440 | 2573 | 2460 | 2.2  | NW  | 2492 | 2481 | 23 | 25 | N  | R  | LK |    | F, M | N |
| 122 | Raft River Mountains | UT | Bull Mtn        | Bull Mtn Cirque         | RGC?       | 41.916071 | -113.358613 | 2832 | 2761 | 4.3  | NE  | 2802 | 2765 | 61 | 31 | N  | R  | WM | SP | M    |   |
| 137 | Ruby Mountains       | NV | Kings Pk        | S of Pk and W ridge     | TALC       | 40.468084 | -115.471925 | 3137 | 3120 | 0.2  | N   | 3130 | 3121 | 18 | 27 | N  | R  | SH |    | M    | N |
| 138 | Ruby Mountains       | NV | Kings Pk        | S of Pk and W ridge     | TALV       | 40.470036 | -115.482392 | 2929 | 2886 | 0.6  | NNW | 2915 | 2882 | 48 | 34 | N  | R  | SH | WM | M    | N |
| 139 | Ruby Mountains       | NV | Kings Pk        | W on ridge              | TALV       | 40.50079  | -115.538477 | 2833 | 2802 | 0.5  | NE  | 2817 | 2816 | 7  | 9  | Y  | R  | AS |    | M    | N |
| 126 | Ruby Mountains       | NV | Liberty Pass    | Lamoille Lk             | TALV       | 40.591124 | -115.396102 | 3024 | 2986 | 1.1  | N   | 3000 | 2988 | 13 | 44 | N  | A2 | UV |    | F, M | N |
| 135 | Ruby Mountains       | NV | Liberty Pk      | NW slope                | TALC       | 40.590266 | -115.400590 | 3158 | 3079 | 1.2  | NW  | 3155 | 3131 | 38 | 32 | N  | R  | WM |    | M    | N |
| 123 | Ruby Mountains       | NV | Liberty Pk East | N cirque-slopes         | TALV       | 40.589525 | -115.380497 | 3054 | 3004 | 2.7  | NW  | 3024 | 3011 | 23 | 30 | N  | R  | LK | WM | F, M | N |
| 124 | Ruby Mountains       | NV | Mt Fitzgerald   | Far north ridge         | TALV       | 40.639097 | -115.428787 | 2850 | 2762 | 2.3  | N   | 2793 | 2738 | 86 | 33 | N  | A2 | SH |    | M    | N |
| 127 | Ruby Mountains       | NV | Mt Fitzgerald   | N cirque main peak      | RGC        | 40.607993 | -115.409503 | 3152 | 3058 | 1.7  | N   | 3129 | 3121 | 26 | 19 | N  | R  | LK | WM | F, M | N |
| 128 | Ruby Mountains       | NV | Mt Fitzgerald   | Below NW ridge          | TALV       | 40.607349 | -115.414637 | 3128 | 3094 | 1.1  | N   | 3107 | 3092 | 29 | 28 | Y  | A2 | RK |    | F, M | N |
| 129 | Ruby Mountains       | NV | Mt Fitzgerald   | Below NW ridge          | TALV       | 40.607454 | -115.420471 | 3041 | 2994 | 1.7  | N   | 3027 | 3011 | 29 | 29 | N  | A1 | LK | WM | F, M | N |
| 130 | Ruby Mountains       | NV | Mt Fitzgerald   | NW ridge, Goat Lk cir   | RGC        | 40.607052 | -115.432470 | 3121 | 2992 | 6.4  | N   | 3043 | 3032 | 33 | 18 | F  | R  | LK |    | M    | N |
| 131 | Ruby Mountains       | NV | Mt Fitzgerald   | NW ridge, Goat Lk cir   | TALV       | 40.608359 | -115.434109 | 3050 | 3032 | 0.4  | N   | 3068 | 3051 | 27 | 32 | N  | R  | LK |    | M    | N |
| 132 | Ruby Mountains       | NV | Mt Fitzgerald   | Lee Peak Cirque         | RGC        | 40.625637 | -115.486573 | 3214 | 3120 | 2.1  | N   | 3150 | 3128 | 57 | 20 | N  | A2 | LK |    | M    | N |
| 140 | Ruby Mountains       | NV | Overland Lk     | E of crest trail        | TALC       | 40.456127 | -115.459051 | 2986 | 2956 | 0.9  | NNW | 2971 | 2960 | 24 | 23 | N  | R  | RK |    | M    | N |
| 133 | Ruby Mountains       | NV | Ruby Dome       | SW ridge                | TALV       | 40.617315 | -115.481739 | 3082 | 3032 | 1.3  | W   | 3061 | 3053 | 13 | 29 | N  | R  | SH |    | M    | N |
| 136 | Ruby Mountains       | NV | Ruby Dome       | NNW slope               | TALC       | 40.624421 | -115.474577 | 3271 | 3220 | 4.0  | N   | 3223 | 3219 | 15 | 16 | N  | R  | RK |    | M    | N |
| 134 | Ruby Mountains       | NV | Ruby Dome       | S ridge, below Echo Lk  | TALC       | 40.604664 | -115.461624 | 2910 | 2867 | 2.0  | NW  | 2901 | 2877 | 33 | 37 | Y  | A2 | LK | SH | M    | N |
| 125 | Ruby Mountains       | NV | Smith Pk        | Northwest ridge         | TALV       | 40.678941 | -115.371887 | 2950 | 2897 | 0.7  | N   | 2883 | 2864 | 32 | 30 | N  | R  | SH |    | M    | N |
| 150 | Ruby Mtns South      | NV | Cass House Pk   | E side north summit     | TALC       | 40.206885 | -115.533838 | 2900 | 2839 | 2.5  | SW  | 2879 | 2824 | 96 | 30 | N  | R  | UV |    | M    | N |
| 145 | Ruby Mtns South      | NV | Green Mtn       | W side north summit     | TALC       | 40.398999 | -115.500281 | 3033 | 2953 | 2.6  | WNW | 3021 | 3000 | 38 | 29 | N  | R  | SH |    | M    | N |
| 146 | Ruby Mtns South      | NV | Green Mtn       | W side north summit     | TALC       | 40.397777 | -115.500224 | 3041 | 3000 | 0.7  | NW  | 3019 | 3001 | 27 | 32 | N  | R  | RK |    | M    | N |
| 147 | Ruby Mtns South      | NV | Green Mtn       | W side north summit     | TALC       | 40.40007  | -115.500026 | 2984 | 2939 | 0.6  | NW  | 2964 | 2954 | 20 | 27 | N  | R  | RK |    | M    | N |
| 148 | Ruby Mtns South      | NV | Green Mtn       | W side north summit     | TALC       | 40.402768 | -115.499608 | 2877 | 2872 | 0.7  | NW  | 2901 | 2877 | 37 | 33 | N  | R  | SH | RK | M    | N |
| 149 | Ruby Mtns South      | NV | Pearl Pk        | SE of crest S of summ   | RGC        | 40.220566 | -115.528658 | 2936 | 2823 | 10.5 | ESE | 2868 | 2829 | 85 | 25 | N  | R  | UV |    | M    | N |
| 141 | Ruby Mtns South      | NV | Tipton Pk       | E side of N summit      | TALC       | 40.430933 | -115.471063 | 2943 | 2817 | 6.0  | NE  | 2896 | 2855 | 59 | 34 | N  | R  | SH |    | M    | N |
| 142 | Ruby Mtns South      | NV | Tipton Pk       | E side main summit      | TALC       | 40.423398 | -115.474255 | 3107 | 3071 | 0.5  | N   | 3083 | 3078 | 22 | 13 | N  | R  | WM |    | M    | N |

|     |                       |    |                     |                        |      |           |             |      |      |       |     |      |      |     |    |   |    |          |    |      |   |
|-----|-----------------------|----|---------------------|------------------------|------|-----------|-------------|------|------|-------|-----|------|------|-----|----|---|----|----------|----|------|---|
| 143 | Ruby Mtns South       | NV | Tipton Pk           | W side main summit     | TALC | 40.425753 | -115.481171 | 3064 | 3011 | 1.5   | NW  | 3060 | 3027 | 51  | 33 | N | R  | LK       |    | M    | N |
| 144 | Ruby Mtns South       | NV | Tipton Pk           | W side south summit    | TALC | 40.407385 | -115.489348 | 3104 | 3084 | 0.5   | NW  | 3085 | 3081 | 17  | 14 | N | R  | WM       | LK | M    | N |
| 157 | Schell Creek Range    | NV | N Schell Pk         | Crest N of NS Pk       | TALV | 39.42812  | -114.608359 | 3103 | 2991 | 5.9   | N   | 3013 | 2991 | 67  | 18 | N | R  | UV       |    | M    | Y |
| 158 | Schell Creek Range    | NV | N Schell Pk         | Crest N of NS Pk       | TALV | 39.429407 | -114.606275 | 3088 | 2941 | 5.8   | N   | 2975 | 2961 | 51  | 15 | N | R  | UV       |    | M    | N |
| 159 | Schell Creek Range    | NV | N Schell Pk         | E Cirque main pk       | RGC  | 39.419962 | -114.593279 | 3227 | 3156 | 6.4   | N   | 3174 | 3157 | 54  | 17 | N | R  | UV       |    | M    | N |
| 162 | Schell Creek Range    | NV | N Schell Pk         | Main E Cirque          | TALV | 39.338021 | -114.575598 | 3057 | 2875 | 4.8   | S   | 2937 | 2914 | 66  | 20 | N | R  | SH       | UV | M    | N |
| 163 | Schell Creek Range    | NV | S Schell Cr Pk      | S of Main Pk, E slopes | RGC  | 39.320838 | -114.552516 | 2802 | 2658 | 7.0   | E   | 2687 | 2664 | 45  | 28 | N | R  | SH       | UV | M    | N |
| 164 | Schell Creek Range    | NV | S Schell Cr Pk      | E Ridge Extending S fr | RGC  | 39.310734 | -114.560004 | 3029 | 2913 | 6.4   | NE  | 2960 | 2917 | 71  | 31 | Y | R  | UV       |    | M    | N |
| 165 | Schell Creek Range    | NV | S Schell Cr Pk      | E Ridge Extending S fr | RGC  | 39.312885 | -114.556348 | 2918 | 2802 | 6.7   | NE  | 2854 | 2842 | 23  | 26 | Y | R  | UV       |    | M    | N |
| 166 | Schell Creek Range    | NV | S Schell Cr Pk      | Main crest extending   | TALV | 39.302121 | -114.601995 | 3092 | 3041 | 1.2   | NE  | 3058 | 3049 | 26  | 18 | N | R  | UV       |    | M    | N |
| 167 | Schell Creek Range    | NV | S Schell Cr Pk      | Main crest extending   | RGC  | 39.302005 | -114.600224 | 3179 | 2878 | 11.2  | SE  | 3015 | 2961 | 97  | 30 | N | R  | SH       | UV | M    | N |
| 168 | Schell Creek Range    | NV | S Schell Cr Pk      | Main crest extending   | TALC | 39.310513 | -114.601881 | 3153 | 3121 | 1.5   | E   | 3148 | 3125 | 42  | 29 | N | R  | SH       | UV | M    | N |
| 169 | Schell Creek Range    | NV | S Schell Cr Pk      | Main crest extending   | TALV | 39.324776 | -114.601956 | 3263 | 3193 | 2.0   | NE  | 3214 | 3212 | 16  | 4  | N | R  | SH       | UV | M    | N |
| 170 | Schell Creek Range    | NV | S Schell Cr Pk      | Main crest extending   | TALC | 39.327372 | -114.603005 | 3279 | 3250 | 0.4   | E   | 3261 | 3256 | 21  | 15 | N | R  | SH       | UV | M    | N |
| 171 | Schell Creek Range    | NV | S Schell Cr Pk      | Cleve Cr Baldy         | TALC | 39.258116 | -114.639687 | 3114 | 3060 | 1.2   | E   | 3085 | 3064 | 34  | 31 | N | R  | UV       |    | M    | N |
| 161 | Schell Creek Range    | NV | Taft Pk             | Main E Cirque          | RGC  | 39.361788 | -114.582956 | 3048 | 2758 | 20.9  | NE  | 2797 | 2760 | 58  | 32 | N | R  | WM       | SP | M    | N |
| 156 | Schell Creek Range    | NV | N Schell Cr Pk      | Crest N of NS Pk       | RGC  | 39.427608 | -114.611030 | 3170 | 3032 | 6.7   | NE  | 3049 | 3031 | 44  | 22 | N | R  | UV       |    | M    | N |
| 153 | Schell Creek Range    | NV | S Schell Cr Pk      | E side of summit SE ri | TALV | 39.319139 | -114.571305 | 3212 | 3155 | 2.6   | NE  | 3229 | 3215 | 34  | 21 | N | R  | SH       |    | M    | N |
| 154 | Schell Creek Range    | NV | S Schell Cr Pk      | E slopes main summit   | TALV | 39.335832 | -114.589728 | 3239 | 3135 | 14.6  | E   | 3178 | 3152 | 52  | 26 | N | R  | UV       |    | M    | N |
| 155 | Schell Creek Range    | NV | S Schell Cr Pk      | E slopes main summit   | TALV | 39.335538 | -114.579845 | 3078 | 3011 | 2.1   | NNE | 3036 | 3018 | 41  | 23 | N | R  | UV       |    | M    | N |
| 160 | Schell Creek Range    | NV | Taft Pk             | W side of crest N of T | TALV | 39.373763 | -114.608595 | 3236 | 3131 | 18.7  | W   | 3182 | 3136 | 87  | 28 | N | R  | UV       |    | M    | N |
| 591 | Sierra Nevada Central | CA | Bloody Mtn          | Main N slopes          | RGC  | 37.572926 | -118.914891 | 3093 | 2991 | 4.8   | NW  | 3021 | 3003 | 33  | 28 | N | R  | WM       | LK | M    | N |
| 592 | Sierra Nevada Central | CA | Bloody Mtn          | near pass with Laurel  | TALC | 37.574784 | -118.898257 | 3214 | 3164 | 1.2   | NW  | 3197 | 3178 | 27  | 35 | N | R  | RK       |    | M    | N |
| 412 | Sierra Nevada Central | CA | Carson Pass N       | Stevens Peak North     | RGC  | 38.738268 | -119.983247 | 2879 | 2835 | 2.6   | NE  | 2860 | 2855 | 14  | 19 | Y | R  | UV       |    | M    | N |
| 413 | Sierra Nevada Central | CA | Carson Pass S       | Red Lake North         | BSR  | 38.712172 | -119.973786 | 2649 | 2594 | 0.8   | E   | 2615 | 2602 | 27  | 26 | N | R  | SH       | RK | F, M | N |
| 414 | Sierra Nevada Central | CA | Carson Pass S       | Elephant's Head 1      | TALC | 38.680246 | -119.980607 | 2735 | 2719 | 0.2   | NE  | 2724 | 2722 | 5   | 25 | N | R  | RK       |    | F, M | N |
| 415 | Sierra Nevada Central | CA | Carson Pass S       | Elephant's Head 2      | TALC | 38.681061 | -119.979339 | 2701 | 2662 | 1.1   | NE  | 2674 | 2664 | 32  | 17 | N | R  | LK       | UV | F, M | N |
| 416 | Sierra Nevada Central | CA | Carson Pass S       | Elephant's Head 3      | TALC | 38.675966 | -119.982977 | 2873 | 2859 | 0.1   | NE  | 2861 | 2859 | 3   | 29 | N | R  | RK       |    | M    | N |
| 593 | Sierra Nevada Central | CA | Convict Cyn         | Uppermost cyn N        | TALC | 37.549433 | -118.911988 | 3408 | 3287 | 4.8   | E   | 3328 | 3304 | 37  | 33 | N | A2 | RK       | WM | M    | N |
| 594 | Sierra Nevada Central | CA | Convict Cyn         | Uppermost cyn N        | RGC  | 37.544643 | -118.908103 | 3407 | 3226 | 10.7  | NE  | 3251 | 3235 | 21  | 37 | Y | A1 | RK (RGC) |    | M    | N |
| 595 | Sierra Nevada Central | CA | Convict Cyn         | Cloverleaf Lk          | RGC  | 37.547117 | -118.902903 | 3383 | 3168 | 33.0  | NE  | 3186 | 3167 | 42  | 25 | Y | R  | LK       | SH | M    | N |
| 596 | Sierra Nevada Central | CA | Convict Cyn         | Cloverleaf Lk          | TALC | 37.540768 | -118.905202 | 3422 | 3306 | 9.1   | NE  | 3348 | 3313 | 46  | 38 | Y | A1 | SH       | LK | M    | Y |
| 597 | Sierra Nevada Central | CA | Convict Cyn         | Bunny Lk               | TALV | 37.536845 | -118.898699 | 3518 | 3357 | 9.4   | NW  | 3363 | 3356 | 15  | 26 | N | A1 | LK       | RK | M    | N |
| 598 | Sierra Nevada Central | CA | Convict Cyn         | Edith Lk               | TALV | 37.548305 | -118.886005 | 3253 | 3230 | 0.2   | W   | 3236 | 3230 | 18  | 17 | N | R  | RK       |    | M    | N |
| 599 | Sierra Nevada Central | CA | Convict Cyn         | Dorothy Lk             | RGC  | 37.527447 | -118.897337 | 3508 | 3424 | 9.3   | NE  | 3433 | 3417 | 36  | 23 | Y | A1 | RK       | LK | F, M | N |
| 600 | Sierra Nevada Central | CA | Convict Cyn         | Dorothy Lk             | TALV | 37.528519 | -118.891382 | 3463 | 3195 | 6.9   | N   | 3376 | 3358 | 35  | 27 | N | A2 | LK       | RK | F, M | N |
| 601 | Sierra Nevada Central | CA | Convict Cyn         | Bighorn Lk             | RGC  | 37.524402 | -118.884768 | 3509 | 3301 | 10.3  | N   | 3368 | 3309 | 87  | 34 | Y | A1 | LK       | RK | F, M | Y |
| 603 | Sierra Nevada Central | CA | Convict Cyn         | Red Slate Pk           | RGC  | 37.515071 | -118.870504 | 3465 | 3312 | 6.4   | NE  | 3359 | 3339 | 24  | 40 | Y | A1 | LK       | RK | M    | Y |
| 604 | Sierra Nevada Central | CA | Convict Cyn         | Red Slate Pk           | RGC  | 37.511181 | -118.866297 | 3646 | 3518 | 11.1  | NE  | 3570 | 3520 | 107 | 25 | N | A1 | LK       | RK | M    | Y |
| 605 | Sierra Nevada Central | CA | Convict Cyn         | Red Slate Pk           | RGC  | 37.510525 | -118.859359 | 3535 | 3385 | 16.4  | N   | 3409 | 3386 | 32  | 36 | Y | A1 | LK       | RK | M    | Y |
| 606 | Sierra Nevada Central | CA | Convict Cyn         | Red Slate Pk           | TALC | 37.508084 | -118.854523 | 3588 | 3511 | 2.8   | NW  | 3544 | 3516 | 43  | 34 | N | A1 | LK       | RK | M    | N |
| 602 | Sierra Nevada Central | CA | Convict Cyn Red Sla | Lk Wit So Nah Pah      | TALC | 37.515115 | -118.876057 | 3465 | 3414 | 0.3   | N   | 3421 | 3416 | 16  | 18 | N | A1 | RK       | LK | M    | Y |
| 654 | Sierra Nevada Central | CA | E Fork Rock Cr Cyn  | Francis Lk Mt Morgan   | RGC  | 37.421846 | -118.727633 | 3717 | 3431 | 59.2  | N   | 3677 | 3650 | 40  | 34 | Y | A1 | LK       | WM | F, M | Y |
| 655 | Sierra Nevada Central | CA | E Fork Rock Cr Cyn  | Francis Lk Mt Morgan   | RGC  | 37.428322 | -118.724935 | 3717 | 3357 | 107.0 | N   | 3423 | 3355 | 123 | 29 | Y | R  | UV       |    | F, M | N |

|     |                       |    |                    |                              |          |            |             |      |      |      |     |      |      |     |    |   |    |    |    |      |   |
|-----|-----------------------|----|--------------------|------------------------------|----------|------------|-------------|------|------|------|-----|------|------|-----|----|---|----|----|----|------|---|
| 656 | Sierra Nevada Central | CA | E Fork Rock Cr Cyn | Francis Cyn                  | TALV     | 37.43508   | -118.712157 | 3354 | 3271 | 18.3 | NW  | 3300 | 3281 | 33  | 30 | N | A2 | UV |    | F, M | N |
| 657 | Sierra Nevada Central | CA | E Fork Rock Cr Cyn | Tamarack Lk                  | RGC      | 37.409053  | -118.716457 | 3746 | 3641 | 6.3  | NE  | 3677 | 3662 | 21  | 34 | N | A1 | LK | RK | F, M | N |
| 658 | Sierra Nevada Central | CA | E Fork Rock Cr Cyn | Tamarack Lk                  | RGC      | 37.407654  | -118.711386 | 3728 | 3535 | 8.6  | NE  | 3652 | 3640 | 18  | 34 | Y | A1 | LK |    | F, M | N |
| 659 | Sierra Nevada Central | CA | E Fork Rock Cr Cyn | Tamarack Lk                  | TALV     | 37.410496  | -118.707203 | 3587 | 3539 | 2.7  | W   | 3554 | 3542 | 20  | 33 | N | A1 | LK |    | F, M | N |
| 660 | Sierra Nevada Central | CA | E Fork Rock Cr Cyn | E Fork Cyn                   | TALV     | 37.415827  | -118.705559 | 3525 | 3428 | 5.9  | NW  | 3463 | 3456 | 16  | 23 | N | R  | WM | RK | F, M | N |
| 661 | Sierra Nevada Central | CA | E Fork Rock Cr Cyn | Wheeler Cr                   | TALV     | 37.429015  | -118.696652 | 3438 | 3242 | 46.0 | NW  | 3300 | 3285 | 29  | 27 | y | A2 | WM | SP | F, M | N |
| 417 | Sierra Nevada Central | CA | Ebbetts Pass S     | Tyron Peak                   | FALC-BSF | 38.523198  | -119.788082 | 2992 | 2908 | 2.5  | NE  | 2940 | 2932 | 13  | 31 | N | R  | RK |    | M    | N |
| 418 | Sierra Nevada Central | CA | Ebbetts Pass S     | Tyron Pk S - S of Nobl       | TALV     | 38.519623  | -119.775680 | 2895 | 2875 | 0.3  | N   | 2880 | 2875 | 18  | 16 | N | R  | RK |    | M    | N |
| 419 | Sierra Nevada Central | CA | Ebbetts Pass S     | Tyron Pk S - S of Nobl       | TALV     | 38.520722  | -119.774228 | 2878 | 2855 | 1.6  | N   | 2869 | 2864 | 29  | 11 | Y | R  | SH | UV | M    | N |
| 420 | Sierra Nevada Central | CA | Ebbetts Pass S     | Unnamed Pk SE of Hig         | TALC     | 38.509854  | -119.704078 | 2877 | 2817 | 1.6  | E   | 2829 | 2824 | 11  | 26 | N | R  | RK | UV | M    | N |
| 421 | Sierra Nevada Central | CA | Ebbetts Pass S     | Unnamed Pk SE of Highland Pk |          | 38.509297  | -119.705980 | 2936 | 2903 | 1.0  | SE  | 2913 | 2913 | 11  | 3  | N | R  | RK |    | M    | N |
| 422 | Sierra Nevada Central | CA | Ebbetts Pass S     | Unnamed Pk SE of Highland Pk |          | 38.51517   | -119.703800 | 2878 | 2862 | 0.2  | NW  | 2873 | 2868 | 11  | 22 | N | R  | RK |    | M    | N |
| 423 | Sierra Nevada Central | CA | Ebbetts Pass S     | Unnamed Pk SE of Highland Pk |          | 38.518851  | -119.699050 | 2943 | 2896 | 1.5  | N   | 2941 | 2926 | 30  | 26 | Y | R  | RK | UV | M    | N |
| 424 | Sierra Nevada Central | CA | Ebbetts Pass S     | Bull Lake                    | TALV     | 38.510422  | -119.750633 | 2778 | 2755 | 0.4  | N   | 2771 | 2765 | 13  | 22 | N | R  | SH | UV | M    | N |
| 685 | Sierra Nevada Central | CA | Gables Lk Cyn      | NE part of cyn               | RGC      | 37.331341  | -118.713665 | 3665 | 3473 | 21.2 | E   | 3522 | 3481 | 65  | 32 | Y | A2 | RK | LK | M    | N |
| 686 | Sierra Nevada Central | CA | Gables Lk Cyn      | Four Gables                  | TALC     | 37.317381  | -118.703301 | 3625 | 3345 | 8.1  | NE  | 3513 | 3456 | 74  | 37 | F | A1 | SP | LK | M    | N |
| 687 | Sierra Nevada Central | CA | Gables Lk Cyn      | Four Gables                  | TALC     | 37.312793  | -118.701148 | 3575 | 3449 | 3.4  | NE  | 3490 | 3460 | 41  | 37 | N | A1 | RK |    | M    | Y |
| 688 | Sierra Nevada Central | CA | Gables Lk Cyn      | Four Gables                  | RGC      | 37.312094  | -118.698343 | 3635 | 3452 | 14.0 | N   | 3494 | 3460 | 43  | 39 | N | A1 | RK |    | M    | Y |
| 689 | Sierra Nevada Central | CA | Gables Lk Cyn      | Four Gables                  | TALC     | 37.317463  | -118.696139 | 3478 | 3317 | 7.4  | N   | 3377 | 3340 | 53  | 35 | N | A1 | WM | UV | M    | N |
| 690 | Sierra Nevada Central | CA | Gables Lk Cyn      | Gables Lk                    | TALC     | 37.326648  | -118.695605 | 3312 | 3179 | 25.0 | NW  | 3202 | 3190 | 28  | 23 | Y | A1 | LK |    | M    | N |
| 691 | Sierra Nevada Central | CA | Gables Lk Cyn      | SE Gables Cyn                | TALV     | 37.325149  | -118.683719 | 3426 | 3349 | 5.9  | W   | 3377 | 3353 | 39  | 32 | N | R  | LK | WM | M    | N |
| 692 | Sierra Nevada Central | CA | Gables Lk Cyn      | SE Gables Cyn                | TALV     | 37.331564  | -118.686376 | 3235 | 3168 | 4.9  | W   | 3189 | 3175 | 32  | 23 | N | R  | LK | WM | M    | N |
| 477 | Sierra Nevada Central | CA | Green Cr Cyn       | Twin Peaks                   | RGC      | 38.087458  | -119.343471 | 3506 | 3401 | 8.5  | NE  | 3409 | 3403 | 19  | 17 | Y | A1 | RK |    | F, M | Y |
| 478 | Sierra Nevada Central | CA | Green Cr Cyn       | Bergona Lks                  | RGC      | 38.081912  | -119.337920 | 3309 | 3206 | 13.4 | ENE | 3216 | 3213 | 23  | 9  | Y | A2 | RK |    | F, M | N |
| 479 | Sierra Nevada Central | CA | Green Cr Cyn       | West Lk                      | TALC     | 38.062962  | -119.301573 | 3136 | 3057 | 7.1  | N   | 3081 | 3079 | 5   | 24 | N | R  | RK | UV | F, M | N |
| 480 | Sierra Nevada Central | CA | Green Cr Cyn       | Monument Ridge               | TALV     | 38.103677  | -119.309367 | 3266 | 3195 | 2.1  | NE  | 3207 | 3197 | 42  | 14 | N | R  | RK |    | F, M | N |
| 481 | Sierra Nevada Central | CA | Green Cr Cyn       | Excelsior                    | TALC     | 38.042750* | -119.307015 | 3326 | 3224 | 4.1  | NE  | 3268 | 3226 | 75  | 30 | N | R  | WM | SH | F, M | N |
| 482 | Sierra Nevada Central | CA | Green Cr Cyn       | Mt Excelsior Main RG         | RGC      | 38.036405  | -119.310474 | 3514 | 3313 | 13.7 | N   | 3390 | 3370 | 49  | 22 | Y | A1 | LK | RK | F, M | Y |
| 483 | Sierra Nevada Central | CA | Green Cr Cyn       | Mt Excelsior SIDE            | TALV     | 38.03638   | -119.305495 | 3488 | 3384 | 2.3  | N   | 3403 | 3383 | 35  | 30 | Y | A1 | RK |    | F, M | Y |
| 484 | Sierra Nevada Central | CA | Green Creek        | Dunderberg                   | RGC      | 38.070123  | -119.281902 | 3228 | 2933 | 12.0 | N   | 3040 | 2933 | 171 | 32 | N | A1 | SH | WM | F, M | N |
| 485 | Sierra Nevada Central | CA | Green Creek        | Dunderberg                   | TALV     | 38.039208  | -119.303190 | 3364 | 3329 | 0.7  | NW  | 3339 | 3336 | 7   | 23 | N | R  | RK |    | F, M | N |
| 486 | Sierra Nevada Central | CA | Green Creek        | Dunderberg Ridge             | TALV     | 38.058743  | -119.287701 | 3202 | 3004 | 7.5  | WNW | 3160 | 3140 | 25  | 38 | N | A2 | LK | WM | F, M | N |
| 621 | Sierra Nevada Central | CA | Hilton Cyn         | Mt Morgan                    | RGC      | 37.502514  | -118.781122 | 3540 | 3361 | 22   | E   | 3436 | 3404 | 51  | 32 | Y | R  | RK | UV | M    | N |
| 622 | Sierra Nevada Central | CA | Hilton Cyn         | Mt Morgan                    | RGC      | 37.499485  | -118.779722 | 3457 | 3270 | 15.3 | E   | 3312 | 3274 | 62  | 31 | Y | R  | WM | RK | M    | N |
| 623 | Sierra Nevada Central | CA | Hilton Cyn         | Mt Morgan                    | RGC      | 37.496933  | -118.774032 | 3310 | 3207 | 8    | NE  | 3231 | 3211 | 26  | 38 | N | A1 | WM | SP | M    | N |
| 624 | Sierra Nevada Central | CA | Hilton Cyn         | Mt Morgan Stanford I         | TALV     | 37.492682  | -118.782207 | 3586 | 3521 | 10.2 | W   | 3541 | 3514 | 58  | 25 | N | A2 | LK | RM | M    | N |
| 625 | Sierra Nevada Central | CA | Hilton Cyn         | Mt Huntington                | TALC     | 37.481132  | -118.784019 | 3659 | 3408 | 20.3 | NE  | 3517 | 3489 | 42  | 34 | N | A1 | RK |    | M    | N |
| 626 | Sierra Nevada Central | CA | Hilton Cyn         | Mt Huntington                | RGC      | 37.474882  | -118.78082  | 3400 | 3442 | 3.4  | NE  | 3465 | 3448 | 38  | 24 | N | A2 | RK |    | M    | N |
| 627 | Sierra Nevada Central | CA | Hilton Cyn         | Mt Huntington                | TALC     | 37.475256  | -118.766781 | 3369 | 3328 | 1.9  | E   | 3342 | 3326 | 33  | 26 | N | R  | RK | UV | M    | N |
| 628 | Sierra Nevada Central | CA | Hilton Cyn         | Mt Huntington                | RGC      | 37.469947  | -118.766723 | 3492 | 3292 | 23.5 | E   | 3314 | 3297 | 31  | 28 | Y | A1 | LK | RK | M    | N |
| 629 | Sierra Nevada Central | CA | Hilton Cyn         | Mt Huntington                | TALC     | 37.462129  | -118.770206 | 3526 | 3428 | 3.1  | N   | 3435 | 3424 | 55  | 11 | Y | A1 | LK | RK | M    | Y |
| 630 | Sierra Nevada Central | CA | Hilton Cyn         | Mt Huntington                | RGC      | 37.460997  | -118.76496  | 3520 | 3373 | 10.3 | N   | 3475 | 3429 | 60  | 38 | N | A1 | LK | RK | M    | Y |
| 631 | Sierra Nevada Central | CA | Hilton Cyn         | Hilton Cr Lakes              | TALV     | 37.479039  | -118.759425 | 3320 | 3262 | 1.6  | NW  | 3275 | 3264 | 25  | 25 | N | A1 | LK |    | F, M | N |
| 632 | Sierra Nevada Central | CA | Hilton Cyn         | Hilton Cr Lakes              | TALV     | 37.483232  | -118.754353 | 3187 | 3156 | 1    | N   | 3173 | 3158 | 30  | 27 | N | R  | LK | SH | F, M | N |

|     |                       |    |               |                        |      |           |             |      |      |      |    |      |      |     |    |   |    |    |    |      |   |
|-----|-----------------------|----|---------------|------------------------|------|-----------|-------------|------|------|------|----|------|------|-----|----|---|----|----|----|------|---|
| 633 | Sierra Nevada Central | CA | Hilton Cyn    | Lower Cyn              | TALV | 37.535418 | -118.761726 | 2771 | 2725 | 1.1  | W  | 2747 | 2735 | 25  | 26 | N | R  | UV |    | F, M | N |
| 566 | Sierra Nevada Central | CA | Mammoth Crest | TJ Lake                | TALC | 37.582062 | -119.012150 | 3187 | 3104 | 2.8  | N  | 3149 | 3118 | 43  | 36 | N | A2 | RK | WM | F, M | N |
| 567 | Sierra Nevada Central | CA | Mammoth Crest | Hammit Lk              | TALC | 37.575116 | -119.001208 | 3240 | 3073 | 5.7  | N  | 3148 | 3104 | 63  | 35 | Y | A2 | LK | RK | F, M | N |
| 568 | Sierra Nevada Central | CA | Mammoth Crest | Hammit Lk              | RGC  | 37.572667 | -118.996786 | 3312 | 3165 | 10.2 | N  | 3207 | 3185 | 26  | 41 | Y | A2 | LK | RK | F, M | N |
| 569 | Sierra Nevada Central | CA | Mammoth Crest | Hammit Lk              | TALC | 37.57047  | -118.994459 | 3337 | 3299 | 1.8  | N  | 3300 | 3299 | 12  | 9  | N | R  | RK |    | M    | N |
| 570 | Sierra Nevada Central | CA | Mammoth Crest | Hammit Lk              | TALV | 37.570295 | -118.990837 | 3313 | 3179 | 2.0  | N  | 3263 | 3236 | 42  | 33 | N | R  | RK |    | M    | N |
| 571 | Sierra Nevada Central | CA | Mammoth Crest | Just N of Barney RGC   | RGC  | 37.5683   | -118.983113 | 3313 | 3142 | 7.0  | N  | 3226 | 3219 | 18  | 22 | Y | A1 | LK | WM | F, M | Y |
| 572 | Sierra Nevada Central | CA | Mammoth Crest | Barney RG              | TALC | 37.568176 | -118.974391 | 3311 | 3091 | 15.4 | NE | 3168 | 3124 | 80  | 29 | Y | A2 | WM | SH | F, M | Y |
| 573 | Sierra Nevada Central | CA | Mammoth Crest | Barney Lk              | TALC | 37.561988 | -118.967576 | 3195 | 3116 | 3.3  | N  | 3156 | 3143 | 18  | 36 | Y | A2 | LK | RK | F, M | N |
| 574 | Sierra Nevada Central | CA | Mammoth Crest | Duck Pass              | TALV | 37.563468 | -118.962806 | 3251 | 3174 | 2.4  | W  | 3223 | 3196 | 46  | 31 | N | A2 | WM | SH | F, M | N |
| 575 | Sierra Nevada Central | CA | Mammoth Crest | Duck Pass Woods Lks    | TALV | 37.566386 | -118.961556 | 3276 | 3126 | 8.0  | W  | 3153 | 3130 | 37  | 32 | Y | A1 | LK | WM | F, M | N |
| 576 | Sierra Nevada Central | CA | Mammoth Crest | Sherwin Crest Duck si  | TALC | 37.57431  | -118.960805 | 3310 | 3269 | 0.5  | S  | 3295 | 3276 | 27  | 36 | N | A2 | WM | RK | F, M | N |
| 577 | Sierra Nevada Central | CA | Mammoth Crest | Sherwin Crest E side   | TALV | 37.611833 | -118.979176 | 2771 | 2583 | 13.1 | N  | 2648 | 2612 | 60  | 31 | Y | R  | UV |    | M    | N |
| 578 | Sierra Nevada Central | CA | Mammoth Crest | Sherwin Crest E side   | TALV | 37.598581 | -118.962257 | 2946 | 2904 | 0.7  | NW | 2923 | 2910 | 24  | 28 | N | R  | UV | SH | M    | N |
| 579 | Sierra Nevada Central | CA | Mammoth Crest | Sherwin Crest E side   | TALV | 37.604751 | -118.949092 | 2729 | 2708 | 3.9  | NE | 2717 | 2708 | 16  | 28 | Y | R  | UV |    | M    | N |
| 580 | Sierra Nevada Central | CA | Mammoth Crest | Sherwin Crest E side L | RGC  | 37.58104  | -118.952365 | 3161 | 2947 | 41.3 | NE | 2985 | 2968 | 31  | 29 | Y | A1 | LK | SH | F, M | N |
| 581 | Sierra Nevada Central | CA | Mammoth Crest | Sherwin Crest E side L | RGC  | 37.58976  | -118.941644 | 2965 | 2752 | 42.0 | NE | 2784 | 2769 | 37  | 23 | Y | R  | LK | SH | F, M | N |
| 582 | Sierra Nevada Central | CA | Mammoth Crest | Sherwin Crest E side   | RGC  | 37.574105 | -118.943163 | 3149 | 3016 | 13.8 | NE | 3046 | 3030 | 34  | 27 | Y | A2 | WM | LK | F, M | N |
| 583 | Sierra Nevada Central | CA | Mammoth Crest | Sherwin Crest Valentii | RGC  | 37.569721 | -118.938941 | 3221 | 2967 | 37.7 | NE | 3008 | 2970 | 56  | 34 | N | A1 | LK | WM | F, M | Y |
| 584 | Sierra Nevada Central | CA | Mammoth Crest | Sherwin Crest Valentii | RGC  | 37.565216 | -118.936193 | 3274 | 3166 | 11.1 | NE | 3184 | 3170 | 27  | 28 | N | A1 | RK |    | M    | N |
| 585 | Sierra Nevada Central | CA | Mammoth Crest | Sherwin Crest Valentii | RGC  | 37.566276 | -118.931537 | 3146 | 3058 | 23.3 | N  | 3093 | 3078 | 27  | 30 | Y | A1 | SP | SH | M    | N |
| 586 | Sierra Nevada Central | CA | Mammoth Crest | Sherwin Crest Valentii | TALV | 37.578588 | -118.934738 | 3048 | 2954 | 7.8  | W  | 2984 | 2971 | 29  | 25 | N | A2 | LK | SH | M    | N |
| 587 | Sierra Nevada Central | CA | Mammoth Crest | Sherwin Crest Valentii | TALV | 37.586863 | -118.935330 | 2916 | 2837 | 6.1  | W  | 2886 | 2843 | 71  | 31 | N | A2 | WM | SH | M    | N |
| 588 | Sierra Nevada Central | CA | Mammoth Crest | Sherwin Crest End of I | TALV | 37.586476 | -118.930324 | 3158 | 3016 | 3.1  | N  | 3030 | 3020 | 15  | 33 | N | R  | UV |    | M    | N |
| 589 | Sierra Nevada Central | CA | Mammoth Crest | Sherwin Crest          | RGC  | 37.55446  | -118.931976 | 3402 | 3314 | 2.5  | N  | 3365 | 3315 | 87  | 30 | N | A1 | LK | RK | M    | Y |
| 590 | Sierra Nevada Central | CA | Mammoth Crest | Sherwin Crest          | RGC  | 37.550335 | -118.928885 | 3419 | 3359 | 1.2  | N  | 3383 | 3361 | 37  | 30 | N | A1 | SP | RK | M    | Y |
| 607 | Sierra Nevada Central | CA | McGee Cyn     | Mt Baldwin             | RGC  | 37.531783 | -118.839313 | 3329 | 3065 | 44.6 | NE | 3114 | 3104 | 21  | 25 | Y | A1 | LK | RK | M    | N |
| 608 | Sierra Nevada Central | CA | McGee Cyn     |                        | TALC | 37.524871 | -118.833958 | 3412 | 3117 | 15.2 | E  | 3124 | 3117 | 16  | 21 | Y | A2 | UV |    | M    | N |
| 609 | Sierra Nevada Central | CA | McGee Cyn     |                        | TALC | 37.521871 | -118.827225 | 3128 | 2879 | 13.4 | NE | 2981 | 2967 | 27  | 27 | N | R  | UV | SH | M    | N |
| 610 | Sierra Nevada Central | CA | McGee Cyn     |                        | TALV | 37.506778 | -118.825950 | 3062 | 2979 | 2.2  | N  | 3014 | 2987 | 39  | 34 | N | R  | UV | WM | M    | N |
| 611 | Sierra Nevada Central | CA | McGee Cyn     | Red and White Mtn      | TALC | 37.485428 | -118.852686 | 3560 | 3417 | 5.6  | NE | 3486 | 3446 | 57  | 35 | N | A2 | RK |    | M    | N |
| 612 | Sierra Nevada Central | CA | McGee Cyn     | Red and White Mtn      | TALV | 37.479135 | -118.848461 | 3475 | 3414 | 2.0  | NW | 3423 | 3420 | 15  | 9  | N | A2 | LK | RK | M    | N |
| 613 | Sierra Nevada Central | CA | McGee Cyn     | Golden Lk              | RGC  | 37.491197 | -118.821905 | 3389 | 3171 | 29.7 | NW | 3319 | 3209 | 151 | 36 | Y | A1 | LK | WM | M    | N |
| 614 | Sierra Nevada Central | CA | McGee Cyn     |                        | TALC | 37.494676 | -118.816216 | 3374 | 3099 | 15.8 | N  | 3201 | 3131 | 98  | 36 | N | A2 | WM | LK | M    | N |
| 615 | Sierra Nevada Central | CA | McGee Cyn     | Steelhead Lk           | RGC  | 37.493274 | -118.809918 | 3474 | 3165 | 38.0 | N  | 3285 | 3242 | 61  | 35 | Y | A1 | LK | WM | M    | N |
| 616 | Sierra Nevada Central | CA | McGee Cyn     | Steelhead Lk           | RGC  | 37.495237 | -118.803019 | 3558 | 3176 | 20.2 | N  | 3344 | 3209 | 207 | 33 | Y | A1 | LK | WM | M    | N |
| 617 | Sierra Nevada Central | CA | McGee Cyn     | Steelhead Lk           | RGC  | 37.496617 | -118.800922 | 3659 | 3185 | 26.5 | N  | 3312 | 3228 | 110 | 37 | Y | A1 | LK | WM | M    | N |
| 618 | Sierra Nevada Central | CA | McGee Cyn     | Steelhead Lk           | TALV | 37.505232 | -118.807489 | 3251 | 3187 | 1.1  | W  | 3224 | 3193 | 48  | 33 | N | A2 | WM | RK | M    | N |
| 619 | Sierra Nevada Central | CA | McGee Cyn     |                        | RGC  | 37.519374 | -118.796438 | 3622 | 3324 | 22   | NE | 3459 | 3421 | 56  | 33 | Y | A1 | LK | RK | M    | N |
| 620 | Sierra Nevada Central | CA | McGee Cyn     |                        | RGC  | 37.517596 | -118.791944 | 3550 | 3438 | 12.3 | N  | 3474 | 3440 | 46  | 36 | Y | A1 | LK | RK | M    | Y |
| 496 | Sierra Nevada Central | CA | Mono Basin    | Cerulean Basin         | RGC  | 38.030061 | -119.301056 | 3562 | 3328 | 10.9 | NE | 3472 | 3444 | 38  | 36 | Y | A1 | LK |    | F, M | Y |
| 497 | Sierra Nevada Central | CA | Mono Basin    | Cerulean Basin         | TALC | 38.024847 | -119.299399 | 3556 | 3503 | 1.5  | NE | 3527 | 3520 | 15  | 25 | Y | A1 | RK |    | F, M | Y |
| 498 | Sierra Nevada Central | CA | Mono Basin    | Cerulean Basin         | TALC | 38.025039 | -119.295410 | 3485 | 3418 | 2.3  | NE | 3452 | 3431 | 43  | 27 | N | A2 | RK |    | F, M | N |
| 499 | Sierra Nevada Central | CA | Mono Basin    | Cerulean Basin         | TALV | 38.029139 | -119.299072 | 3472 | 3340 | 1.7  | NE | 3380 | 3369 | 24  | 23 | N | A1 | LK |    | F, M | N |

|     |                       |    |            |                       |         |           |              |      |      |      |     |      |      |     |    |   |    |    |    |      |   |
|-----|-----------------------|----|------------|-----------------------|---------|-----------|--------------|------|------|------|-----|------|------|-----|----|---|----|----|----|------|---|
| 500 | Sierra Nevada Central | CA | Mono Basin | Cerulean Basin        | GC LOWE | 38.031621 | -119.296021  | 3329 | 3297 | 11.2 | E   | 3315 | 3303 | 31  | 22 | Y | A2 | RK | UV | F, M | N |
| 501 | Sierra Nevada Central | CA | Mono Basin | Cerulean Basin        | TALV    | 38.030575 | -119.289002  | 3344 | 3224 | 2.8  | N   | 3236 | 3231 | 16  | 18 | N | A1 | WM | LK | F, M | N |
| 502 | Sierra Nevada Central | CA | Mono Basin | Lundy--Upper Cyn      | TALV    | 38.014685 | -119.291732  | 3227 | 3088 | 4.9  | E   | 3153 | 3135 | 34  | 28 | N | A2 | RK |    | F, M | N |
| 503 | Sierra Nevada Central | CA | Mono Basin | Lundy--N Asp          | RGC     | 37.99852  | -119.270463  | 3346 | 3204 | 5.9  | N   | 3287 | 3266 | 33  | 32 | Y | A1 | RK |    | F, M | Y |
| 504 | Sierra Nevada Central | CA | Mono Basin | Lundy--N Asp          | RGC     | 37.99856  | -119.267727  | 3361 | 3222 | 8.1  | N   | 3241 | 3232 | 16  | 29 | Y | A1 | RK |    | F, M | Y |
| 505 | Sierra Nevada Central | CA | Mono Basin | Lundy--N Asp          | TALV    | 38.005712 | -119.269379  | 3182 | 2999 | 4.9  | N   | 3021 | 3002 | 40  | 26 | N | A1 | RK | UV | F, M | N |
| 506 | Sierra Nevada Central | CA | Mono Basin | Lundy--N Asp          | TALV    | 38.015256 | -119.256416  | 3020 | 2821 | 3.6  | N   | 2882 | 2869 | 36  | 19 | N | R  | UV |    | M    | N |
| 507 | Sierra Nevada Central | CA | Mono Basin | Lundy-Lake Cyn Oneic  | TALV    | 37.997142 | -119.251595  | 3012 | 2953 | 3.4  | E   | 2971 | 2953 | 38  | 26 | N | R  | LK |    | F, M | N |
| 508 | Sierra Nevada Central | CA | Mono Basin | Lundy-Lake Cyn Oneic  | TALV    | 37.990173 | -119.255046  | 3057 | 2971 | 3.4  | NE  | 3013 | 3003 | 26  | 20 | N | R  | LK |    | F, M | N |
| 509 | Sierra Nevada Central | CA | Mono Basin | Lundy-Lake Cyn Alma   | TALV    | 37.983472 | -119.250993  | 3088 | 3039 | 1.0  | NW  | 3079 | 3049 | 42  | 36 | N | A2 | LK |    | F, M | N |
| 510 | Sierra Nevada Central | CA | Mono Basin | Lundy-Lake Cyn Uppe   | TALV    | 37.990225 | -119.248666  | 3131 | 2980 | 19.2 | W   | 3028 | 2993 | 59  | 31 | Y | A2 | WM | LK | F, M | N |
| 511 | Sierra Nevada Central | CA | Mono Basin | Lundy Lake Cyn Oneid  | TALV    | 37.996525 | -119.246042  | 3003 | 2926 | 4.1  | NW  | 2969 | 2939 | 46  | 33 | N | A1 | WM | SH | F, M | N |
| 512 | Sierra Nevada Central | CA | Mono Basin | Lundy Lake Cyn Oneid  | TALC    | 37.994439 | -119.238595  | 3223 | 3169 | 2.0  | N   | 3231 | 3220 | 24  | 24 | N | R  | RK |    | F, M | N |
| 513 | Sierra Nevada Central | CA | Mono Basin | Lundy Lake Cyn Oneid  | TALV    | 37.996333 | -119.240038  | 3185 | 3135 | 0.8  | W   | 3162 | 3150 | 20  | 30 | N | R  | RK |    | F, M | N |
| 514 | Sierra Nevada Central | CA | Mono Basin | Lundy Lake Cyn Crystz | TALV    | 38.001562 | -119.244872  | 2940 | 2895 | 8.1  | W   | 2911 | 2894 | 38  | 24 | Y | A2 | LK |    | F, M | N |
| 515 | Sierra Nevada Central | CA | Mono Basin | Lundy Lake Cyn W Slo  | TALV    | 38.008429 | -119.242684  | 2932 | 2769 | 22.4 | W   | 2791 | 2779 | 23  | 27 | N | R  | WM | SH | F, M | N |
| 516 | Sierra Nevada Central | CA | Mono Basin | Lundy Deer Cr Cyn     | slump   | 38.010016 | -119.219493  | 3025 | 2913 | 12.9 | NE  | 2961 | 2932 | 91  | 18 | N | R  | UV | WM | F, M | N |
| 517 | Sierra Nevada Central | CA | Mono Basin | Lundy Deer Cr Cyn     | RGC     | 38.003462 | -119.222263  | 3178 | 3078 | 10.5 | N   | 3097 | 3078 | 41  | 25 | Y | A2 | RK |    | F, M | N |
| 518 | Sierra Nevada Central | CA | Mono Basin | Mt Warren             | RGC     | 37.979253 | -119.211179  | 3390 | 3342 | 10.6 | NE  | 3314 | 3309 | 19  | 16 | Y | A2 | RK |    | F, M | N |
| 519 | Sierra Nevada Central | CA | Mono Basin | Mt Warren             | slump   | 37.97934  | -119.202601  | 3331 | 3250 | 4.1  | N   | 3261 | 3256 | 19  | 14 | N | R  | RK |    | F, M | N |
| 520 | Sierra Nevada Central | CA | Mono Basin | Mt Warren             | 3GC-FLA | 37.982221 | -119.190202  | 3142 | 3059 | 9.2  | W   | 3110 | 3106 | 13  | 17 | Y | A1 | RK | SP | F, M | N |
| 521 | Sierra Nevada Central | CA | Mono Basin | Mt Warren             | 3GC-FLA | 37.984082 | -119.189015  | 3124 | 3071 | 6.6  | W   | 3078 | 3075 | 12  | 18 | Y | R  | RK | UV | F, M | N |
| 522 | Sierra Nevada Central | CA | Mono Basin | Lee Vining Pk         | TALV    | 37.975315 | -119.191383  | 3224 | 3195 | 0.7  | NE  | 3199 | 3194 | 21  | 13 | N | R  | RK |    | F, M | N |
| 523 | Sierra Nevada Central | CA | Mono Basin | Lundy Lake Cyn Mt W   | TALC    | 37.993583 | -119.232975  | 3497 | 3313 | 17.7 | W   | 3416 | 3405 | 22  | 27 | N | A2 | RK | LK | F, M | N |
| 524 | Sierra Nevada Central | CA | Mono Basin | Lee Vining Cyn Lower  | TALC    | 37.912595 | -119.184802  | 3167 | 2892 | 66.5 | NE  | 3018 | 3010 | 14  | 30 | Y | A2 | RK | UV | F, M | N |
| 525 | Sierra Nevada Central | CA | Mono Basin | Lee Vining Cyn Untere | RGC     | 37.923012 | -119.185548  | 2960 | 2505 | 37.5 | NE  | 2547 | 2523 | 52  | 25 | Y | R  | UV |    | F, M | N |
| 526 | Sierra Nevada Central | CA | Mono Basin | Lee Vining Cyn Untere | RGC     | 37.92275  | -119.197699  | 3012 | 2882 | 26.3 | NE  | 2882 | 2877 | 14  | 22 | Y | A2 | UV | RK | F, M | N |
| 527 | Sierra Nevada Central | CA | Mono Basin | Lee Vining Cyn Untere | RGC     | 37.927443 | -119.191278  | 3012 | 2365 | 59.9 | NE  | 2783 | 2763 | 39  | 27 | Y | R  | UV | RK | F, M | N |
| 528 | Sierra Nevada Central | CA | Mono Basin | Lee Vining Cyn Untere | RGC     | 37.923822 | -119.204749  | 3293 | 2914 | 35.2 | NNE | 3090 | 3072 | 29  | 31 | Y | A1 | RK |    | F, M | Y |
| 529 | Sierra Nevada Central | CA | Mono Basin | Karolyn Cyn Upper     | RGC     | 37.927649 | -119.216186  | 3259 | 3029 | 19.4 | N   | 3149 | 3130 | 30  | 33 | Y | A1 | SP | SH | F, M | Y |
| 530 | Sierra Nevada Central | CA | Mono Basin | Karolyn Cyn Side Ridg | TALV    | 37.930697 | -119.214037  | 3225 | 3033 | 7.6  | WNW | 3184 | 3111 | 112 | 33 | N | A1 | RK |    | F, M | Y |
| 531 | Sierra Nevada Central | CA | Mono Basin | Karolyn Cyn Pleisto R | RGC     | 37.932008 | -119.215211° | 3225 | 2817 | 46.5 | N   | 2899 | 2828 | 101 | 35 | Y | A1 | SH | WM | F, M | Y |
| 532 | Sierra Nevada Central | CA | Mono Basin | LVC Tioga Lk Falls    | TALV    | 37.93713  | -119.225363  | 2990 | 2930 | 2.7  | NNW | 2966 | 2953 | 28  | 26 | N | R  | RK | UV | F, M | N |
| 533 | Sierra Nevada Central | CA | Mono Basin | Ellery Lk             | RGC     | 37.927273 | -119.227362  | 3350 | 3206 | 5.7  | NNW | 3283 | 3248 | 52  | 34 | N | A1 | RK |    | F, M | Y |
| 534 | Sierra Nevada Central | CA | Mono Basin | Warren Cyn W Fork     | TALV    | 37.976406 | -119.251855  | 3161 | 3136 | 0.4  | SW  | 3146 | 3142 | 18  | 13 | N | R  | WM |    | F, M | N |
| 535 | Sierra Nevada Central | CA | Mono Basin | North Pk Main Glacier | C MORA  | 37.985185 | -119.313239  | 3496 | 3385 | 5.2  | NE  | 3410 | 3390 | 39  | 28 | N | A1 | RK | LK | F, M | Y |
| 536 | Sierra Nevada Central | CA | Mono Basin | Conness Main Glacier  | C MORA  | 37.974001 | -119.317484  | 3543 | 3442 | 10.0 | N   | 3480 | 3441 | 68  | 30 | Y | A1 | LK |    | F, M | Y |
| 537 | Sierra Nevada Central | CA | Mono Basin | Conness Main Glacier  | C MORA  | 37.970815 | -119.312406  | 3510 | 3372 | 9.3  | NNE | 3475 | 3424 | 81  | 32 | Y | A1 | LK |    | F, M | Y |
| 538 | Sierra Nevada Central | CA | Mono Basin | Greenstone Lk         | TALC    | 37.974358 | -119.292596  | 3333 | 3174 | 3.3  | N   | 3204 | 3188 | 25  | 33 | N | A1 | LK | WM | F, M | N |
| 539 | Sierra Nevada Central | CA | Mono Basin | White Mtn Bighorn La  | RGC     | 37.947462 | -119.302820  | 3466 | 3322 | 7.0  | N   | 3406 | 3375 | 49  | 32 | N | A1 | LK |    | F, M | Y |
| 540 | Sierra Nevada Central | CA | Mono Basin | Mt Dana Glacier Cyn   | TALV    | 37.909532 | -119.219714  | 3466 | 3369 | 9.2  | W   | 3422 | 3393 | 51  | 29 | Y | A2 | LK | RK | F, M | N |
| 541 | Sierra Nevada Central | CA | Mono Basin | Mt Dana Glacier Cyn   | TALV    | 37.909314 | -119.223377  | 3430 | 3380 | 0.7  | NE  | 3402 | 3380 | 40  | 29 | N | A2 | RK |    | F, M | N |
| 542 | Sierra Nevada Central | CA | Mono Basin | Dana Plateau          | TALC    | 37.906336 | -119.204743  | 3646 | 3622 | 0.4  | NE  | 3632 | 3623 | 19  | 25 | N | A1 | LK | RK | F, M | N |
| 543 | Sierra Nevada Central | CA | Mono Basin | Gibbs Cyn Untere Dan  | TALC    | 37.90464  | -119.184067  | 2987 | 2912 | 7.3  | SE  | 2957 | 2946 | 27  | 22 | Y | R  | RK | UV | F, M | N |

|     |                       |    |             |                       |      |           |             |      |      |      |     |      |      |     |    |   |    |    |    |      |   |
|-----|-----------------------|----|-------------|-----------------------|------|-----------|-------------|------|------|------|-----|------|------|-----|----|---|----|----|----|------|---|
| 544 | Sierra Nevada Central | CA | Mono Basin  | Gibbs Cyn Rebecca's F | RGC  | 37.89734  | -119.189417 | 3139 | 3039 | 2.6  | N   | 3111 | 3089 | 35  | 33 | N | R  | UV | RK | F, M | N |
| 545 | Sierra Nevada Central | CA | Mono Basin  | Gibbs Main Rock Glac  | RGC  | 37.896    | -119.202960 | 3502 | 3175 | 35.3 | NE  | 3190 | 3179 | 30  | 21 | Y | A1 | LK |    | F, M | Y |
| 546 | Sierra Nevada Central | CA | Mono Basin  | Bloody Cyn N hanging  | TALV | 37.876289 | -119.197831 | 3431 | 3357 | 0.3  | ENE | 3378 | 3358 | 32  | 32 | N | A1 | RK |    | F, M | N |
| 547 | Sierra Nevada Central | CA | Mono Basin  | Mt Lewis              | RGC  | 37.84772  | -119.196392 | 3401 | 3312 | 2.2  | NE  | 3367 | 3357 | 15  | 33 | N | A1 | RK |    | M    | Y |
| 548 | Sierra Nevada Central | CA | Mono Basin  | Mt Lewis, Bloody Cyn  | TALV | 37.856025 | -119.194277 | 3121 | 3088 | 1.8  | W   | 3109 | 3092 | 33  | 28 | N | A1 | WM |    | F, M | N |
| 549 | Sierra Nevada Central | CA | Mono Basin  | Bloody Cyn            | TALV | 37.862365 | -119.189246 | 2966 | 2764 | 3.6  | NW  | 2960 | 2946 | 26  | 28 | N | R  | WM |    | F, M | N |
| 550 | Sierra Nevada Central | CA | Mono Basin  | Upper Clot Cyn        | RGC  | 37.852297 | -119.180769 | 3053 | 3017 | 1.4  | NE  | 3028 | 3020 | 25  | 19 | N | R  | RK |    | F, M | N |
| 551 | Sierra Nevada Central | CA | Mono Basin  | Lower Clot Cyn        | TALV | 37.856187 | -119.178813 | 2992 | 2975 | 0.6  | E   | 2981 | 2979 | 13  | 9  | N | R  | UV |    | F, M | N |
| 552 | Sierra Nevada Central | CA | Mono Basin  | Kuna Pk under Main C  | RGC  | 37.820009 | -119.208634 | 3709 | 3587 | 21.0 | N   | 3715 | 3696 | 39  | 26 | Y | A1 | RK | LK | F, M | Y |
| 553 | Sierra Nevada Central | CA | Mono Basin  | Parker Pk RG          | RGC  | 37.818782 | -119.196669 | 3612 | 3581 | 1.2  | N   | 3609 | 3581 | 40  | 35 | N | A1 | LK | RK | F, M | Y |
| 554 | Sierra Nevada Central | CA | Mono Basin  | Mt Wood               | TALC | 37.81831  | -119.154230 | 2991 | 2916 | 7.7  | N   | 2934 | 2917 | 34  | 27 | N | A2 | SH | UV | F, M | Y |
| 555 | Sierra Nevada Central | CA | Mono Basin  | Alger Lakes           | TALC | 37.797337 | -119.199995 | 3626 | 3563 | 0.7  | NE  | 3604 | 3573 | 43  | 36 | N | A1 | LK | RK | M    | Y |
| 556 | Sierra Nevada Central | CA | Mono Basin  | Mt Lyell              | TALC | 37.748832 | -119.252037 | 3640 | 3516 | 2.9  | NE  | 3573 | 3538 | 52  | 34 | N | A1 | RK |    | M    | Y |
| 557 | Sierra Nevada Central | CA | Mono Basin  | Rodgers Pk            | RGC  | 37.729051 | -119.257018 | 3705 | 3593 | 4.8  | N   | 3613 | 3598 | 38  | 22 | Y | A1 | LK | RK | M    | Y |
| 558 | Sierra Nevada Central | CA | Mono Basin  | Mt Davis              | TALC | 37.725849 | -119.235063 | 3434 | 3422 | 0.3  | NE  | 3433 | 3425 | 23  | 18 | N | A1 | LK | RK | M    | Y |
| 559 | Sierra Nevada Central | CA | Mono Basin  | Mt Davis Davis Lks    | RGC  | 37.720537 | -119.225665 | 3437 | 3156 | 4.7  | N   | 3283 | 3234 | 38  | 52 | N | A1 | LK | RK | M    | Y |
| 560 | Sierra Nevada Central | CA | Mono Basin  | Mt Davis Davis Lks    | RGC  | 37.718171 | -119.216816 | 3510 | 3428 | 3.1  | N   | 3447 | 3442 | 30  | 9  | N | A1 | LK | RK | M    | Y |
| 561 | Sierra Nevada Central | CA | Mono Basin  | Carson Pk             | RGC  | 37.737082 | -119.131548 | 3097 | 3069 | 12.6 | N   | 3097 | 3067 | 81  | 20 | Y | R  | SH | SP | F, M | N |
| 562 | Sierra Nevada Central | CA | Mono Basin  | Carson Pk Spooky Md   | TALC | 37.748825 | -119.131242 | 2944 | 2825 | 5.5  | W   | 2914 | 2842 | 107 | 34 | N | A2 | SH | SP | F, M | N |
| 563 | Sierra Nevada Central | CA | Mono Basin  | Carson Pk             | TALC | 37.747284 | -119.120068 | 3096 | 3031 | 0.5  | NE  | 3062 | 3040 | 40  | 29 | N | R  | RK |    | F, M | N |
| 564 | Sierra Nevada Central | CA | Mono Basin  | Carson Pk Fern Lk     | TALV | 37.74082  | -119.108212 | 2820 | 2719 | 3.7  | W   | 2792 | 2761 | 60  | 27 | N | R  | WM | LK | F, M | N |
| 565 | Sierra Nevada Central | CA | Mono Basin  | San Joaquin Pk Yost M | TALC | 37.728293 | -119.094219 | 3126 | 3069 | 1.3  | NE  | 3097 | 3073 | 34  | 35 | N | A2 | SH | UV | F, M | N |
| 693 | Sierra Nevada Central | CA | Mt Tom      | Elderberry Cyn        | TALC | 37.355497 | -118.650280 | 3431 | 3219 | 12.8 | NE  | 3316 | 3249 | 90  | 37 | N | R  | RK |    | M    | N |
| 694 | Sierra Nevada Central | CA | Mt Tom      |                       | TALC | 37.347382 | -118.645575 | 3468 | 3166 | 24.4 | N   | 3326 | 3262 | 93  | 35 | N | A2 | RK |    | M    | N |
| 662 | Sierra Nevada Central | CA | Pine Cr Cyn | Wheeler Crest         | TALV | 37.398213 | -118.702438 | 3417 | 3260 | 11.4 | SE  | 3388 | 3291 | 143 | 34 | N | R  | RK |    | F, M | N |
| 663 | Sierra Nevada Central | CA | Pine Cr Cyn | Tunsten Cyn Mt Morg   | RGC  | 37.404386 | -118.722830 | 3726 | 3600 | 15.7 | NE  | 3681 | 3671 | 18  | 30 | Y | R  | RK |    | M    | N |
| 664 | Sierra Nevada Central | CA | Pine Cr Cyn | Tunsten Cyn Mt Morg   | TALV | 37.389294 | -118.722223 | 3551 | 3461 | 8.1  | E   | 3466 | 3461 | 16  | 18 | N | R  | RK |    | M    | N |
| 665 | Sierra Nevada Central | CA | Pine Cr Cyn | Tunsten Cyn Mt Morg   | TALV | 37.393364 | -118.735390 | 3529 | 3378 | 8.0  | E   | 3401 | 3382 | 32  | 31 | N | R  | RK |    | M    | N |
| 666 | Sierra Nevada Central | CA | Pine Cr Cyn | Upper Morgan Lk       | TALV | 37.386815 | -118.745817 | 3442 | 3347 | 4.5  | NE  | 3414 | 3371 | 69  | 32 | N | A2 | LK | SH | M    | N |
| 667 | Sierra Nevada Central | CA | Pine Cr Cyn | Morgan Pass           | TALV | 37.378257 | -118.727538 | 3271 | 3156 | 10.1 | NE  | 3221 | 3203 | 34  | 28 | N | A2 | LK | WM | M    | N |
| 668 | Sierra Nevada Central | CA | Pine Cr Cyn | Finch Lk              | TALV | 37.37988  | -118.735755 | 3393 | 3316 | 5.6  | SW  | 3370 | 3352 | 28  | 33 | N | A2 | LK | RK | M    | N |
| 669 | Sierra Nevada Central | CA | Pine Cr Cyn | Finch Lk              | TALV | 37.378275 | -118.746041 | 3583 | 3529 | 1.2  | E   | 3565 | 3560 | 13  | 18 | N | A2 | LK | RK | M    | N |
| 670 | Sierra Nevada Central | CA | Pine Cr Cyn | Bear Cr Spire         | TALC | 37.36792  | -118.758582 | 3701 | 3634 | 1.9  | NW  | 3638 | 3634 | 21  | 9  | N | A1 | LK | RK | M    | N |
| 671 | Sierra Nevada Central | CA | Pine Cr Cyn | Bear Cr Lk            | TALV | 37.366854 | -118.751039 | 3610 | 3534 | 2.0  | N   | 3561 | 3541 | 31  | 33 | N | A1 | LK | RK | M    | N |
| 672 | Sierra Nevada Central | CA | Pine Cr Cyn | Split Lk              | TALV | 37.367746 | -118.742548 | 3463 | 3421 | 1.0  | NW  | 3437 | 3427 | 20  | 27 | N | A1 | LK | RK | M    | N |
| 673 | Sierra Nevada Central | CA | Pine Cr Cyn |                       | RGC  | 37.36401  | -118.737134 | 3430 | 3321 | 2.3  | NE  | 3383 | 3338 | 62  | 36 | N | A1 | LK | RK | M    | N |
| 674 | Sierra Nevada Central | CA | Pine Cr Cyn | Tungsten Cyn Mt Mor   | TALV | 37.363372 | -118.727222 | 3309 | 3102 | 9.6  | NW  | 3125 | 3118 | 23  | 18 | Y | R  | WM | UV | M    | N |
| 675 | Sierra Nevada Central | CA | Pine Cr Cyn | Bear Creek Spire      | RGC  | 37.362304 | -118.760563 | 3805 | 3609 | 23.2 | NE  | 3634 | 3591 | 60  | 36 | N | A1 | LK | RK | M    | Y |
| 676 | Sierra Nevada Central | CA | Pine Cr Cyn | Mt Julius Cesar       | RGC  | 37.35507  | -118.775089 | 3767 | 3529 | 15.5 | E   | 3623 | 3586 | 56  | 33 | N | R  | RK | UV | M    | N |
| 677 | Sierra Nevada Central | CA | Pine Cr Cyn | Mt Julius Cesar       | RGC  | 37.342241 | -118.780776 | 3731 | 3586 | 3.6  | NNE | 3603 | 3588 | 26  | 31 | Y | A1 | SP | LK | M    | Y |
| 678 | Sierra Nevada Central | CA | Pine Cr Cyn | Mt Julius Cesar       | RGC  | 37.338483 | -118.776037 | 3709 | 3585 | 11.7 | N   | 3609 | 3596 | 31  | 23 | Y | A1 | SP | LK | M    | N |
| 679 | Sierra Nevada Central | CA | Pine Cr Cyn | Mt Julius Cesar Golde | RGC  | 37.326009 | -118.748096 | 3532 | 3437 | 9.3  | N   | 3456 | 3438 | 44  | 22 | Y | A1 | WM | LK | M    | Y |
| 680 | Sierra Nevada Central | CA | Pine Cr Cyn | S part of cyn         | TALV | 37.326367 | -118.743611 | 3457 | 3351 | 1.3  | NE  | 3390 | 3373 | 29  | 31 | N | R  | SH | RK | M    | N |
| 681 | Sierra Nevada Central | CA | Pine Cr Cyn | S part of cyn         | RGC  | 37.327427 | -118.727589 | 3434 | 3354 | 20.2 | NNW | 3386 | 3358 | 40  | 35 | Y | A2 | SH | UV | M    | N |

|     |                       |    |               |                       |      |           |             |      |      |      |     |      |      |     |    |   |     |    |    |      |   |
|-----|-----------------------|----|---------------|-----------------------|------|-----------|-------------|------|------|------|-----|------|------|-----|----|---|-----|----|----|------|---|
| 682 | Sierra Nevada Central | CA | Pine Cr Cyn   | S part of cyn above m | TALC | 37.340971 | -118.709451 | 3527 | 3185 | 16.5 | N   | 3282 | 3277 | 16  | 18 | N | A1  | SH |    | M    | Y |
| 683 | Sierra Nevada Central | CA | Pine Cr Cyn   | S part of cyn         | TALC | 37.339672 | -118.703009 | 3494 | 3307 | 6.0  | N   | 3381 | 3369 | 18  | 32 | Y | A2  | RK | LK | M    | N |
| 684 | Sierra Nevada Central | CA | Pine Cr Cyn   | S part of cyn         | TALV | 37.342745 | -118.694755 | 3207 | 3182 | 0.2  | NW  | 3198 | 3187 | 16  | 34 | N | R   | SH | UV | M    | N |
| 634 | Sierra Nevada Central | CA | Rock Cr Cyn   | Lower Cyn             | TALV | 37.475311 | -118.744918 | 3219 | 3178 | 0.5  | NE  | 3204 | 3183 | 46  | 25 | N | R   | UV |    | M    | N |
| 635 | Sierra Nevada Central | CA | Rock Cr Cyn   | Patricia Lk           | TALC | 37.464974 | -118.754237 | 3419 | 3292 | 1.9  | E   | 3364 | 3331 | 41  | 39 | N | A2  | WM | LK | F, M | N |
| 636 | Sierra Nevada Central | CA | Rock Cr Cyn   | Cyn opposite E Rock C | TALV | 37.452879 | -118.754109 | 3351 | 3198 | 6.9  | SE  | 3231 | 3199 | 52  | 32 | N | R   | UV |    | F, M | N |
| 637 | Sierra Nevada Central | CA | Rock Cr Cyn   | Ruby Lk               | TALV | 37.413715 | -118.768544 | 3421 | 3395 | 0.7  | NW  | 3406 | 3395 | 22  | 26 | N | A1  | LK |    | F, M | N |
| 638 | Sierra Nevada Central | CA | Rock Cr Cyn   | Mono Pass             | TALV | 37.420257 | -118.775164 | 3615 | 3555 | 2.9  | SE  | 3596 | 3555 | 61  | 34 | N | A2  | RK |    | F, M | N |
| 639 | Sierra Nevada Central | CA | Rock Cr Cyn   | Ruby Lk               | RGC  | 37.411589 | -118.778953 | 3735 | 3514 | 9.3  | E   | 3666 | 3593 | 96  | 37 | Y | A1  | LK | SH | F, M | N |
| 640 | Sierra Nevada Central | CA | Rock Cr Cyn   | Ruby Lk Mt Abbott     | RGC  | 37.393749 | -118.783703 | 3874 | 3588 | 20.9 | NNE | 3633 | 3610 | 31  | 36 | Y | A1  | LK | SP | F, M | Y |
| 641 | Sierra Nevada Central | CA | Rock Cr Cyn   | Mt Abbott             | RGC  | 37.38936  | -118.780586 | 3895 | 3735 | 11.2 | N   | 3853 | 3759 | 137 | 35 | Y | A1  | LK | RK | F, M | Y |
| 642 | Sierra Nevada Central | CA | Rock Cr Cyn   | Mt Abbott             | RGC  | 37.385772 | -118.776216 | 3911 | 3646 | 22.8 | NE  | 3810 | 3699 | 176 | 32 | Y | A1  | LK | RK | F, M | Y |
| 643 | Sierra Nevada Central | CA | Rock Cr Cyn   | Treasure Lks          | TALC | 37.378991 | -118.774161 | 3861 | 3735 | 4    | NE  | 3858 | 3768 | 128 | 35 | N | A1  | LK | RK | M    | Y |
| 644 | Sierra Nevada Central | CA | Rock Cr Cyn   | Treasure Lks          | TALC | 37.381072 | -118.770289 | 3644 | 3548 | 2.2  | N   | 3574 | 3540 | 91  | 21 | N | A1  | LK | RK | M    | N |
| 645 | Sierra Nevada Central | CA | Rock Cr Cyn   | Dade Lake             | RGC  | 37.376123 | -118.767945 | 3790 | 3527 | 19.6 | NE  | 3698 | 3597 | 209 | 26 | N | A1  | LK | RK | M    | Y |
| 646 | Sierra Nevada Central | CA | Rock Cr Cyn   | Bear Cr Spire         | TALC | 37.377659 | -118.753999 | 3684 | 3566 | 7.1  | N   | 3584 | 3567 | 29  | 29 | Y | A1  | LK | RK | F, M | N |
| 647 | Sierra Nevada Central | CA | Rock Cr Cyn   | Gem Lks               | TALV | 37.386955 | -118.753405 | 3477 | 3405 | 1.8  | W   | 3437 | 3414 | 37  | 32 | N | A1  | LK | RK | F, M | N |
| 648 | Sierra Nevada Central | CA | Rock Cr Cyn   | Chickenfoot Lk        | RGC  | 37.396743 | -118.752306 | 3355 | 3287 | 1.5  | W   | 3316 | 3288 | 41  | 35 | N | A1  | LK | RK | F, M | N |
| 649 | Sierra Nevada Central | CA | Rock Cr Cyn   | Chickenfoot Lk Mt Mc  | TALV | 37.402065 | -118.744509 | 3597 | 3458 | 10.9 | N   | 3482 | 3462 | 28  | 36 | N | A1  | LK | SP | F, M | N |
| 650 | Sierra Nevada Central | CA | Rock Cr Cyn   | Mt Morgan N asp slop  | TALV | 37.407384 | -118.745562 | 3452 | 3406 | 1.5  | W   | 3421 | 3412 | 19  | 26 | N | A1  | WM | RK | F, M | N |
| 651 | Sierra Nevada Central | CA | Rock Cr Cyn   | Mt Morgan N asp slop  | TALV | 37.415277 | -118.746096 | 3332 | 3247 | 1.8  | NW  | 3317 | 3310 | 14  | 26 | N | A2  | LK | RK | F, M | N |
| 652 | Sierra Nevada Central | CA | Rock Cr Cyn   | Mt Morgan N ridge     | TALV | 37.434273 | -118.735191 | 3277 | 3040 | 83.0 | W   | 3127 | 3076 | 83  | 32 | Y | A1  | LK | WM | F, M | N |
| 653 | Sierra Nevada Central | CA | Rock Cr Cyn   | Mt Morgan end of N r  | TALV | 37.449298 | -118.724380 | 3174 | 3123 | 3.3  | N   | 3152 | 3121 | 29  | 47 | N | A1  | UV |    | F, M | N |
| 438 | Sierra Nevada Central | CA | Silver King   | Whitecliff Pk N Ridge | TALC | 38.407214 | -119.626785 | 3217 | 3146 | 1.1  | E   | 3151 | 3148 | 22  | 8  | N | R   | RK | UV | M    | N |
| 439 | Sierra Nevada Central | CA | Silver King   | Whitecliff Pk N Ridge | TALV | 38.409933 | -119.625427 | 3148 | 3125 | 0.9  | E   | 3132 | 3125 | 16  | 22 | N | R   | RK | WM | M    | N |
| 440 | Sierra Nevada Central | CA | Silver King   | Whitecliff Pk N Ridge | TALV | 38.45164  | -119.621294 | 2956 | 2868 | 2.0  | NE  | 2897 | 2880 | 27  | 31 | N | R   | UV | WM | M    | N |
| 425 | Sierra Nevada Central | CA | Sonora Pass N | Lost Canon Pk N shou  | RGC  | 38.416045 | -119.546501 | 2959 | 2897 | 3.7  | NE  | 2926 | 2900 | 51  | 27 | Y | A2  | SH | UV | M    | N |
| 426 | Sierra Nevada Central | CA | Sonora Pass N | White Mtn             | TALV | 38.383276 | -119.610209 | 3225 | 3193 | 0.5  | NE  | 3207 | 3192 | 46  | 18 | N | R   | RK |    | M    | N |
| 427 | Sierra Nevada Central | CA | Sonora Pass N | White Mtn             | TALV | 38.383528 | -119.613517 | 3293 | 3281 | 0.9  | NE  | 3251 | 3235 | 35  | 24 | N | R   | RK |    | M    | N |
| 428 | Sierra Nevada Central | CA | Sonora Pass N | White Mtn             | RGC  | 38.379016 | -119.605650 | 3229 | 3055 | 25.9 | NE  | 3109 | 3098 | 29  | 21 | Y | R   | SH | UV | M    | N |
| 429 | Sierra Nevada Central | CA | Sonora Pass N | White Mtn             | TALC | 38.371985 | -119.602799 | 3206 | 3093 | 7.5  | E   | 3179 | 3143 | 73  | 26 | Y | A2  | WM | SH | M    | N |
| 430 | Sierra Nevada Central | CA | Sonora Pass N | White Mtn             | TALV | 38.372153 | -119.597385 | 3179 | 3053 | 5.1  | NW  | 3068 | 3055 | 34  | 20 | N | A2? | WM | SH | M    | N |
| 431 | Sierra Nevada Central | CA | Sonora Pass N | White Mtn             | TALV | 38.374331 | -119.593535 | 3083 | 3024 | 0.9  | N   | 3042 | 3028 | 32  | 22 | N | R   | WM | SH | M    | N |
| 432 | Sierra Nevada Central | CA | Sonora Pass N | White Mtn             | BSR  | 38.367084 | -119.598267 | 3231 | 3123 | 6.6  | E   | 3167 | 3159 | 17  | 25 | N | R   | SH | WM | M    | N |
| 433 | Sierra Nevada Central | CA | Sonora Pass N | White Mtn             | TALV | 38.360842 | -119.610280 | 3217 | 3053 | 4.8  | SW  | 3123 | 3108 | 28  | 28 | N | R   | SH | WM | M    | N |
| 434 | Sierra Nevada Central | CA | Sonora Pass N | White Mtn             | TALC | 38.363919 | -119.613161 | 3235 | 3200 | 1.0  | SW  | 3226 | 3208 | 39  | 25 | N | R   | WM | RK | M    | N |
| 435 | Sierra Nevada Central | CA | Sonora Pass N | Wells Pk              | TALV | 38.390795 | -119.580620 | 3101 | 3023 | 3.1  | S   | 3081 | 3016 | 133 | 26 | N | R   | RK | UV | M    | N |
| 436 | Sierra Nevada Central | CA | Sonora Pass N | White Mtn             | TALV | 38.38829  | -119.613587 | 3151 | 3103 | 2.1  | NE  | 3120 | 3111 | 20  | 22 | N | R   | LK | WM | M    | N |
| 437 | Sierra Nevada Central | CA | Sonora Pass S | Leavitt Lk Valley     | TALV | 38.292644 | -119.592354 | 2875 | 2833 | 0.9  | NNW | 2857 | 2837 | 34  | 30 | N | R   | RK | UV | F, M | N |
| 441 | Sierra Nevada Central | CA | Sonora Pass S | Poison Lk             | TALV | 38.483695 | -119.647207 | 2808 | 2745 | 1.7  | N   | 2753 | 2747 | 16  | 22 | N | R   | WM | UV | M    | N |
| 442 | Sierra Nevada Central | CA | Sonora Pass S | Leavitt Pk            | RGC  | 38.286916 | -119.647481 | 3355 | 3317 | 2.8  | NE  | 3320 | 3318 | 10  | 14 | N | A2  | RK | LK | F, M | N |
| 443 | Sierra Nevada Central | CA | Sonora Pass S | Koenig Lk, Leavitt Pk | TALC | 38.276721 | -119.631675 | 3122 | 3064 | 1.7  | N   | 3078 | 3075 | 13  | 13 | N | A2  | LK | SH | F, M | N |
| 444 | Sierra Nevada Central | CA | Sonora Pass S | Leavitt Lk            | TALC | 38.270406 | -119.626890 | 3146 | 3068 | 1.8  | N   | 3115 | 3105 | 29  | 18 | N | R   | RK |    | F, M | N |
| 487 | Sierra Nevada Central | CA | Virginia Cr   | Virginia Cyn head     | TALV | 38.039336 | -119.291033 | 3360 | 3271 | 2.1  | NNE | 3306 | 3296 | 18  | 28 | N | A2  | LK | RK | F, M | Y |

|     |                       |    |                |                          |       |           |             |      |      |      |    |      |      |    |    |   |    |    |    |      |   |
|-----|-----------------------|----|----------------|--------------------------|-------|-----------|-------------|------|------|------|----|------|------|----|----|---|----|----|----|------|---|
| 488 | Sierra Nevada Central | CA | Virginia Cr    | Virginia Cyn head        | RGC   | 38.03835  | -119.288210 | 3384 | 3284 | 2.0  | N  | 3311 | 3297 | 22 | 32 | Y | A1 | LK | RK | F, M | Y |
| 489 | Sierra Nevada Central | CA | Virginia Cr    | Virginia Cyn Frog Lks    | TALV  | 38.042835 | -119.283212 | 3271 | 3208 | 1.3  | N  | 3213 | 3207 | 21 | 16 | N | A1 | WM |    | F, M | Y |
| 490 | Sierra Nevada Central | CA | Virginia Cr    | Virginia Cyn Frog Lks    | TALV  | 38.042769 | -119.281551 | 3255 | 3201 | 1.7  | N  | 3225 | 3215 | 16 | 31 | N | A1 | WM |    | F, M | N |
| 491 | Sierra Nevada Central | CA | Virginia Cr    | Virginia Cyn Little V Lk | TALV  | 38.045563 | -119.258575 | 3029 | 2967 | 2.4  | N  | 2972 | 2971 | 5  | 13 | N | A1 | LK |    | F, M | N |
| 492 | Sierra Nevada Central | CA | Virginia Cr    | Virginia Cyn Little V Lk | TALV  | 38.0465   | -119.254127 | 3016 | 2988 | 3.8  | N  | 3006 | 3004 | 23 | 5  | N | R  | UV |    | F, M | N |
| 493 | Sierra Nevada Central | CA | Virginia Cr    | Virginia Cyn Little V Lk | TALV  | 38.051441 | -119.282340 | 3256 | 3207 | 2.0  | SE | 3211 | 3209 | 10 | 12 | N | A2 | LK | WM | F, M | N |
| 494 | Sierra Nevada Central | CA | Virginia Cr    | Virginia Cyn Moat Lk     | TALC  | 38.05717  | -119.281771 | 3326 | 3222 | 2.3  | E  | 3254 | 3233 | 35 | 31 | N | A1 | LK |    | F, M | N |
| 495 | Sierra Nevada Central | CA | Virginia Cr    | Virginia Cyn Trumbell    | TALV  | 38.055098 | -119.256518 | 2973 | 2949 | 2.6  | SW | 2961 | 2950 | 27 | 21 | Y | A1 | LK |    | F, M | N |
| 460 | Sierra Nevada Central | CA | Walker Upper E | Little Lk                | TALV  | 38.139444 | -119.450932 | 3054 | 2997 | 1.4  | NW | 3012 | 2999 | 25 | 28 | N | A2 | WM | SH | M    | N |
| 461 | Sierra Nevada Central | CA | Walker Upper E | Crown Point              | BSR   | 38.11686  | -119.459307 | 3069 | 2929 | 5.0  | N  | 2959 | 2930 | 60 | 26 | N | A1 | LK |    | M    | N |
| 462 | Sierra Nevada Central | CA | Walker Upper E | Crown Point              | RGC   | 38.115094 | -119.454606 | 3186 | 3042 | 9.1  | N  | 3114 | 3081 | 58 | 30 | N | A1 | LK |    | F, M | Y |
| 463 | Sierra Nevada Central | CA | Walker Upper E | Slide Pk S               | RGC   | 38.100996 | -119.448278 | 3266 | 3105 | 4.5  | N  | 3198 | 3175 | 48 | 25 | N | A1 | LK | WM | F, M | Y |
| 464 | Sierra Nevada Central | CA | Walker Upper E | Slide Cyn, Malby Lk      | RGC   | 38.11698  | -119.418137 | 3255 | 2933 | 8.9  | N  | 3189 | 3168 | 28 | 36 | N | A1 | RK |    | F, M | Y |
| 465 | Sierra Nevada Central | CA | Walker Upper E | Sawtooth Ridge, Glaci    | RGC   | 38.108763 | -119.404433 | 3367 | 3082 | 49.3 | N  | 3184 | 3138 | 62 | 37 | Y | A1 | RK |    | F, M | Y |
| 466 | Sierra Nevada Central | CA | Walker Upper E | Sawtooth Ridge, Avala    | RGC   | 38.108692 | -119.393744 | 3417 | 3264 | 14.8 | N  | 3325 | 3277 | 77 | 32 | N | A1 | RK |    | F, M | Y |
| 467 | Sierra Nevada Central | CA | Walker Upper E | Sawtooth Ridge, Matt     | RGC   | 38.103271 | -119.386415 | 3417 | 3251 | 16.2 | NE | 3292 | 3272 | 37 | 28 | N | A1 | RK |    | F, M | Y |
| 468 | Sierra Nevada Central | CA | Walker Upper E | Sawtooth Ridge, Matt     | RGC   | 38.100897 | -119.378996 | 3365 | 3099 | 20.6 | NE | 3239 | 3223 | 27 | 31 | N | A1 | LK | RK | F, M | Y |
| 469 | Sierra Nevada Central | CA | Walker Upper E | Sawtooth Ridge, Twin     | RGC-M | 38.092907 | -119.361249 | 3386 | 3025 | 28.6 | N  | 3098 | 3069 | 60 | 25 | Y | A1 | RK |    | F, M | Y |
| 470 | Sierra Nevada Central | CA | Walker Upper E | Horse Cyn                | TALV  | 38.112501 | -119.362102 | 3127 | 3050 | 6.8  | N  | 3106 | 3105 | 12 | 7  | N | R  | UV |    | M    | N |
| 471 | Sierra Nevada Central | CA | Walker Upper E | Horse Cyn                | TALV  | 38.109938 | -119.357682 | 3092 | 2942 | 4.0  | E  | 2998 | 2972 | 40 | 34 | N | R  | RK |    | M    | N |
| 472 | Sierra Nevada Central | CA | Walker Upper E | Twin Peaks               | RGC   | 38.092459 | -119.350327 | 3453 | 3221 | 32.9 | NE | 3255 | 3239 | 23 | 34 | Y | A1 | LK |    | M    | Y |
| 473 | Sierra Nevada Central | CA | Walker Upper E | Twin Peaks               | TALV  | 38.094619 | -119.344591 | 3391 | 3131 | 6.1  | N  | 3200 | 3158 | 56 | 37 | N | R  | LK | RK | M    | N |
| 474 | Sierra Nevada Central | CA | Walker Upper E | Tamarack Cyn Hunew       | RGC   | 38.109043 | -119.322130 | 3248 | 3079 | 32.9 | N  | 3136 | 3129 | 20 | 18 | Y | A1 | LK |    | F, M | Y |
| 475 | Sierra Nevada Central | CA | Walker Upper E | Tamarack Cyn Hunew       | RGC   | 38.107687 | -119.316126 | 3235 | 3172 | 2.5  | N  | 3191 | 3185 | 27 | 13 | N | A2 | LK |    | F, M | N |
| 476 | Sierra Nevada Central | CA | Walker Upper E | Tamarack Cyn Tamar       | TALV  | 38.128885 | -119.313851 | 2955 | 2880 | 2.8  | W  | 2928 | 2897 | 22 | 55 | N | A2 | LK | SP | F, M | N |
| 445 | Sierra Nevada Central | CA | Walker Upper W | Forsyth Pk W Tower L     | RGC   | 38.15724  | -119.560930 | 3223 | 3102 | 6.9  | NE | 3202 | 3191 | 28 | 21 | N | R  | RK | LK | M    | N |
| 446 | Sierra Nevada Central | CA | Walker Upper W | Ehrnbeck Pk              | RGC   | 38.140325 | -119.5129   | 3308 | 3148 | 10.4 | N  | 3232 | 3195 | 71 | 27 | N | A1 | SH | LK | M    | Y |
| 447 | Sierra Nevada Central | CA | Walker Upper W | Hawksbeak Pk             | TALC  | 38.152014 | -119.5135   | 3031 | 2962 | 1.9  | N  | 2974 | 2961 | 24 | 29 | N | R  | LK | WM | M    | N |
| 448 | Sierra Nevada Central | CA | Walker Upper W | Hunewill Pk              | RGC   | 38.165401 | -119.443214 | 3339 | 3061 | 16.0 | N  | 3077 | 3068 | 27 | 20 | Y | A1 | WM | RK | M    | Y |
| 449 | Sierra Nevada Central | CA | Walker Upper W | Hunewill Pk              | RGC   | 38.161624 | -119.438473 | 3424 | 3264 | 4.7  | N  | 3274 | 3266 | 26 | 16 | N | R  | RK |    | M    | N |
| 450 | Sierra Nevada Central | CA | Walker Upper W | Hunewill Pk              | TALC  | 38.182299 | -119.394667 | 3196 | 3101 | 5.9  | E  | 3121 | 3103 | 40 | 24 | N | R  | RK | UV | M    | N |
| 451 | Sierra Nevada Central | CA | Walker Upper W | Hunewill Pk              | TALC  | 38.200277 | -119.45409  | 3140 | 3017 | 6.4  | E  | 3058 | 3049 | 34 | 15 | Y | R  | RK |    | N    | N |
| 452 | Sierra Nevada Central | CA | Walker Upper W | Hunewill Pk              | RGC   | 38.17552  | -119.448268 | 3098 | 2644 | 17.6 | N  | 2681 | 2647 | 59 | 30 | N | R  | SH | AS | M    | N |
| 453 | Sierra Nevada Central | CA | Walker Upper W | Hunewill Pk              | TALC  | 38.165291 | -119.459690 | 3152 | 2939 | 7.1  | N  | 2978 | 2960 | 53 | 19 | N | R  | UV |    |      | N |
| 454 | Sierra Nevada Central | CA | Walker Upper W | Hanging Valley Ridge     | TALV  | 38.242575 | -119.462931 | 3214 | 2959 | 12.0 | W  | 3058 | 3051 | 22 | 17 | N | R  | SH | UV | F, M | N |
| 455 | Sierra Nevada Central | CA | Walker Upper W | Hanna Mtn                | RGC   | 38.197534 | -119.495754 | 3347 | 3155 | 7.4  | N  | 3206 | 3186 | 48 | 23 | N | R  | WM | SH | F, M | N |
| 456 | Sierra Nevada Central | CA | Walker Upper W | Anna Lk                  | TALC  | 38.226459 | -119.512273 | 3257 | 3041 | 15.8 | N  | 3105 | 3093 | 36 | 19 | Y | A2 | WM | SH | F, M | N |
| 457 | Sierra Nevada Central | CA | Walker Upper W | Mt Emma                  | TALC  | 38.279172 | -119.481766 | 2955 | 2841 | 3.1  | W  | 2894 | 2886 | 13 | 30 | N | A2 | LK |    | F, M | N |
| 458 | Sierra Nevada Central | CA | Walker Upper W | Mt Emma                  | TALV  | 38.28198  | -119.480022 | 2868 | 2777 | 1.8  | NW | 2820 | 2811 | 29 | 18 | Y | A2 | SH |    | F, M | N |
| 459 | Sierra Nevada Central | CA | Walker Upper W | Paiute Pass              | TALV  | 38.256525 | -119.503318 | 3098 | 3061 | 0.8  | NW | 3067 | 3064 | 5  | 25 | N | R  | RK | SH | M    | N |
| 403 | Sierra Nevada North   | CA | Tahoe Basin    | Twin Peaks               | RGC   | 39.115304 | -120.230740 | 2484 | 2405 | 2.8  | NE | 2411 | 2406 | 7  | 36 | N | R  | SH |    | M    | N |
| 404 | Sierra Nevada North   | CA | Tahoe Basin    | Crest S of Barker Pass   | TALV  | 39.067069 | -120.229292 | 2466 | 2447 | 0.5  | NE | 2460 | 2447 | 30 | 22 | N | R  | UV |    | M    | N |
| 405 | Sierra Nevada North   | CA | Tahoe Basin    | Crest S of Barker Pass   | TALV  | 39.066221 | -120.225251 | 2465 | 2415 | 2.6  | N  | 2447 | 2414 | 59 | 29 | N | R  | UV |    | M    | N |
| 406 | Sierra Nevada North   | CA | Tahoe Basin    | Crest S of Barker Pass   | TALV  | 39.065838 | -120.222858 | 2479 | 2440 | 2.2  | N  | 2472 | 2451 | 50 | 23 | N | R  | UV |    | M    | N |

|     |                     |    |                                          |                       |      |           |             |      |      |      |     |      |      |     |    |   |    |    |    |      |    |
|-----|---------------------|----|------------------------------------------|-----------------------|------|-----------|-------------|------|------|------|-----|------|------|-----|----|---|----|----|----|------|----|
| 407 | Sierra Nevada North | CA | Tahoe Basin                              | S of Kalmia Lk        | TALC | 38.907752 | -120.121322 | 2680 | 2625 | 4.6  | NW  | 2647 | 2644 | 24  | 9  | Y | R  | SH | UV | M    | N  |
| 408 | Sierra Nevada North | CA | Tahoe Basin                              | S of Kalmia Lk        | TALC | 38.903751 | -120.123000 | 2767 | 2742 | 0.5  | NNW | 2745 | 2741 | 11  | 19 | N | R  | RK |    | M    | N  |
| 409 | Sierra Nevada North | CA | Tahoe Basin                              | Mt Tallac             | TALC | 38.905346 | -120.090753 | 2564 | 2496 | 1.6  | NW  | 2516 | 2501 | 31  | 26 | N | R  | RK |    | F, M | N  |
| 410 | Sierra Nevada North | CA | Tahoe Basin                              | Mt Tallac             | TALC | 38.896366 | -120.087270 | 2452 | 2393 | 1.0  | ENE | 2423 | 2410 | 38  | 19 | N | R  | UV |    | F, M | N  |
| 411 | Sierra Nevada North | CA | Tahoe Basin                              | Mt Tallac             | TALC | 38.897859 | -120.087222 | 2448 | 2373 | 2.5  | E   | 2403 | 2384 | 35  | 29 | N | R  | SH | UV | F, M | N  |
| 810 | Sierra Nevada South | CA | Baxter Cr                                | Upper cirque          | RGC  | 36.868795 | -118.361954 | 3679 | 3491 | 14.0 | NE  | 3561 | 3546 | 23  | 32 | Y | A1 | LK | RK | M    | N  |
| 811 | Sierra Nevada South | CA | Baxter Cr                                | Upper cirque          | TALC | 36.875567 | -118.357746 | 3491 | 3270 | 21.0 | N   | 3324 | 3301 | 50  | 24 | Y | A2 | LK | RK | M    | N  |
| 812 | Sierra Nevada South | CA | Baxter Cr                                | Upper Sawmill Lk      | TALV | 36.880759 | -118.352020 | 3286 | 3135 | 4.0  | NW  | 3252 | 3244 | 17  | 27 | N | R  | LK | SH | M    | N  |
| 813 | Sierra Nevada South | CA | Baxter Cr                                | Sawmill Lk            | TALV | 36.882615 | -118.344241 | 3214 | 3039 | 35.9 | NNW | 3109 | 3066 | 68  | 32 | Y | A2 | LK |    | M    | N  |
| 756 | Sierra Nevada South | CA | Big Pine Creek N Pa Sky Haven Pk         |                       | TALV | 37.138144 | -118.507717 | 3487 | 3339 | 27.5 | S   | 3392 | 3359 | 55  | 31 | N | R  | SP | SH | F, M | N  |
| 757 | Sierra Nevada South | CA | Big Pine Creek N Pa Cloudripper          |                       | TALV | 37.135905 | -118.525828 | 3660 | 3581 | 4.0  | SE  | 3649 | 3621 | 50  | 29 | N | R  | RK | LK | F, M | N  |
| 758 | Sierra Nevada South | CA | Big Pine Creek N Pa Picture Puzzle Pk    |                       | RGC  | 37.130731 | -118.533382 | 3808 | 3644 | 10.6 | NE  | 3781 | 3758 | 54  | 23 | Y | R  | RK |    | F, M | N  |
| 759 | Sierra Nevada South | CA | Big Pine Creek N Pa Gendarme Pk          |                       | RGC  | 37.130914 | -118.528359 | 3714 | 3623 | 6.3  | NNE | 3663 | 3623 | 67  | 31 | N | A2 | RK |    | F, M | N  |
| 760 | Sierra Nevada South | CA | Big Pine Creek N Pa Gendarme Pk          |                       | TALC | 37.12622  | -118.523369 | 3672 | 3617 | 2.2  | E   | 3626 | 3617 | 19  | 25 | N | R  | RK |    | F, M | N  |
| 761 | Sierra Nevada South | CA | Big Pine Creek N Pa Mt Agassiz           |                       | RGC  | 37.118955 | -118.523005 | 3845 | 3574 | 46.5 | NE  | 3691 | 3666 | 45  | 29 | Y | A1 | RK |    | F, M | Y  |
| 762 | Sierra Nevada South | CA | Big Pine Creek N Pa Mt Robinson 5th Lk   |                       | TALC | 37.126434 | -118.511617 | 3523 | 3357 | 3.9  | NE  | 3452 | 3410 | 58  | 36 | N | A1 | LK | SH | F, M | Y  |
| 763 | Sierra Nevada South | CA | Big Pine Creek N Pa Thunderbolt Pk Sam   |                       | RGC  | 37.107321 | -118.513011 | 3913 | 3586 | 59.6 | N   | 3609 | 3590 | 41  | 25 | y | A1 | LK | RK | F, M | Y  |
| 764 | Sierra Nevada South | CA | Big Pine Creek N Pa North Pal Glacier RG |                       | RGC  | 37.11013  | -118.503158 | 3868 | 3586 | 37.8 | NNE | 3622 | 3588 | 53  | 33 | Y | A1 | RK | LK | F, M | Y  |
| 765 | Sierra Nevada South | CA | Big Pine Creek N Pa Temple Crag          |                       | TALC | 37.112144 | -118.497276 | 3502 | 3388 | 3.0  | N   | 3419 | 3392 | 37  | 37 | N | A1 | RK | LK | F, M | N  |
| 766 | Sierra Nevada South | CA | Big Pine Creek N Pa Temple Crag          |                       | RGC  | 37.113363 | -118.485371 | 3468 | 3326 | 5.4  | N   | 3371 | 3325 | 84  | 29 | N | A2 | RK |    | F, M | N  |
| 767 | Sierra Nevada South | CA | Big Pine Creek N Pa First Lk             |                       | TALV | 37.121881 | -118.486315 | 3095 | 3064 | 0.9  | NW  | 3084 | 3070 | 32  | 24 | N | R  | LK |    | F, M | LK |
| 768 | Sierra Nevada South | CA | Big Pine Creek S Pal Mt Sill             |                       | RGC  | 37.097675 | -118.495933 | 3858 | 3731 | 11.9 | NE  | 3753 | 3732 | 38  | 29 | Y | A1 | LK |    | F, M | Y  |
| 769 | Sierra Nevada South | CA | Big Pine Creek S Pal Mt Jepson           |                       | RGC  | 37.088435 | -118.489116 | 3842 | 3542 | 34.4 | NNE | 3633 | 3539 | 131 | 36 | Y | A1 | RK |    | F, M | Y  |
| 770 | Sierra Nevada South | CA | Big Pine Creek S Pal Middle Pal          |                       | RGC  | 37.078893 | -118.467323 | 3724 | 3597 | 3.0  | N   | 3618 | 3598 | 28  | 36 | Y | A1 | RK |    | M    | Y  |
| 771 | Sierra Nevada South | CA | Big Pine Creek S Pal Middle Pal          |                       | RGC  | 37.075017 | -118.458716 | 3689 | 3524 | 3.6  | N   | 3546 | 3530 | 25  | 33 | Y | A1 | LK | RK | M    | Y  |
| 772 | Sierra Nevada South | CA | Big Pine Creek S Pal S Fk Pass The Thumb |                       | RGC  | 37.07705  | -118.450824 | 3722 | 3341 | 42.9 | N   | 3404 | 3356 | 87  | 29 | Y | A1 | RK | LK | F, M | Y  |
| 773 | Sierra Nevada South | CA | Birch Cr                                 | Birch Lk Cyn          | TALC | 37.083006 | -118.427792 | 3459 | 3372 | 3.1  | NE  | 3387 | 3374 | 23  | 30 | N | R  | WM | SP | M    | N  |
| 774 | Sierra Nevada South | CA | Birch Cr                                 | Birch Lk Cyn          | TALV | 37.077834 | -118.436127 | 3571 | 3448 | 4.3  | S   | 3556 | 3525 | 59  | 28 | N | R  | RK |    | M    | N  |
| 775 | Sierra Nevada South | CA | Birch Cr                                 | Birch Lk Cyn          | RGC  | 37.077434 | -118.438451 | 3599 | 3527 | 5.7  | E   | 3561 | 3545 | 32  | 26 | Y | R  | RK |    | M    | Y  |
| 776 | Sierra Nevada South | CA | Birch Cr                                 | Birch Lk Cyn The Thun | TALV | 37.073051 | -118.439500 | 3651 | 3602 | 2.7  | SE  | 3607 | 3604 | 12  | 12 | N | R  | RK |    | M    | N  |
| 777 | Sierra Nevada South | CA | Birch Cr                                 | Birch Lk Cyn          | RGC  | 37.073471 | -118.442848 | 3727 | 3643 | 3.0  | E   | 3690 | 3648 | 70  | 31 | N | A1 | RK |    | M    | Y  |
| 778 | Sierra Nevada South | CA | Birch Cr                                 | Birch Lk Cyn Birch Lk | RGC  | 37.066186 | -118.430323 | 3701 | 3466 | 29.8 | N   | 3511 | 3465 | 69  | 34 | Y | A1 | LK | RK | M    | Y  |
| 779 | Sierra Nevada South | CA | Birch Cr                                 | Birch Lk Cyn Birch Lk | TALV | 37.075719 | -118.421009 | 3281 | 3166 | 3.6  | N   | 3210 | 3192 | 27  | 34 | N | A2 | SP | SH | M    | N  |
| 780 | Sierra Nevada South | CA | Birch Cr                                 | Birch Lk Cyn          | BSR  | 37.069812 | -118.401673 | 3273 | 3096 | 13.9 | NE  | 3220 | 3183 | 61  | 31 | N | R  | RK |    | M    | N  |
| 704 | Sierra Nevada South | CA | Bishop Cr                                | Basin Mtn             | TALC | 37.302042 | -118.648574 | 3504 | 3215 | 13.4 | NE  | 3253 | 3218 | 64  | 29 | N | R  | RK | UV | M    | Y  |
| 705 | Sierra Nevada South | CA | Bishop Cr                                | Mt Humphreys          | TALC | 37.289071 | -118.663930 | 3565 | 3423 | 5.4  | E   | 3519 | 3458 | 92  | 33 | N | R  | RK | LK | M    | N  |
| 706 | Sierra Nevada South | CA | Bishop Cr                                | Mt Humphreys Longle   | RGC  | 37.279105 | -118.666351 | 3783 | 3271 | 91.8 | NE  | 3586 | 3424 | 270 | 31 | Y | A1 | LK |    | M    | Y  |
| 707 | Sierra Nevada South | CA | Bishop Cr                                | Mt Humphreys          | TALC | 37.267661 | -118.663813 | 3721 | 3495 | 10.0 | E   | 3691 | 3606 | 138 | 32 | N | A1 | SP | WM | M    | Y  |
| 708 | Sierra Nevada South | CA | Bishop Cr                                | Mt Humphreys          | TALV | 37.264525 | -118.655332 | 3529 | 3287 | 24.7 | N   | 3317 | 3286 | 53  | 30 | Y | A1 | SP | WM | M    | N  |
| 709 | Sierra Nevada South | CA | Bishop Cr                                | Mt Emerson            | RGC  | 37.248709 | -118.648899 | 3620 | 3270 | 60.0 | N   | 3285 | 3270 | 27  | 28 | Y | A1 | SP | SH | M    | Y  |
| 710 | Sierra Nevada South | CA | Bishop Cr                                | Mt Emerson            | RGC  | 37.243977 | -118.639385 | 3427 | 3244 | 25.1 | NW  | 3299 | 3281 | 31  | 30 | Y | A1 | LK | RK | M    | N  |
| 711 | Sierra Nevada South | CA | Bishop Cr                                | Mt Emerson            | RGC  | 37.254108 | -118.632716 | 3200 | 3001 | 16.8 | NW  | 3091 | 3083 | 77  | 6  | N | R  | SP | WM | M    | N  |
| 712 | Sierra Nevada South | CA | Bishop Cr                                | North Lk              | RGC  | 37.230057 | -118.622863 | 3399 | 2827 | 19.2 | SE  | 2872 | 2830 | 75  | 29 | Y | R  | SP | WM | M    | N  |
| 713 | Sierra Nevada South | CA | Bishop Cr                                | Piute Cyn Emerson Lk  | RGC  | 37.2255   | -118.674568 | 3745 | 3480 | 30.9 | NE  | 3596 | 3545 | 73  | 35 | Y | A1 | LK | RK | M    | Y  |

|     |                     |    |                  |                      |      |           |             |      |      |      |     |      |      |     |    |   |    |    |    |      |   |
|-----|---------------------|----|------------------|----------------------|------|-----------|-------------|------|------|------|-----|------|------|-----|----|---|----|----|----|------|---|
| 714 | Sierra Nevada South | CA | Bishop Cr        | Piute Cyn Loch Leven | TALC | 37.229897 | -118.653122 | 3341 | 3270 | 2.1  | N   | 3292 | 3274 | 34  | 28 | N | A2 | LK | SP | M    | N |
| 715 | Sierra Nevada South | CA | Bishop Cr        | Lamarck--Wonder Lks  | RGC  | 37.217037 | -118.672287 | 3735 | 3541 | 26.3 | NE  | 3615 | 3538 | 134 | 30 | Y | A1 | LK | RK | M    | Y |
| 716 | Sierra Nevada South | CA | Bishop Cr        | Lamarck--Wonder Lks  | TALV | 37.216721 | -118.656680 | 3520 | 3455 | 4.1  | N   | 3487 | 3470 | 30  | 29 | N | R  | WM | SH | M    | N |
| 717 | Sierra Nevada South | CA | Bishop Cr        | Lamarck--Sky High Lk | RGC  | 37.205573 | -118.673769 | 3788 | 3615 | 31.3 | NE  | 3668 | 3631 | 56  | 34 | Y | A1 | LK | RK | M    | Y |
| 718 | Sierra Nevada South | CA | Bishop Cr        | Lamarck--Wishbone L  | RGC  | 37.203375 | -118.665006 | 3614 | 3499 | 37.0 | N   | 3551 | 3518 | 58  | 30 | Y | A1 | LK | WM | M    | Y |
| 719 | Sierra Nevada South | CA | Bishop Cr        | Upper Lamarck Lk     | TALV | 37.205386 | -118.653046 | 3540 | 3435 | 3.2  | NW  | 3463 | 3442 | 29  | 37 | N | A1 | LK | RK | M    | Y |
| 720 | Sierra Nevada South | CA | Bishop Cr        | Lower Lamarck Lks    | TALV | 37.20921  | -118.635570 | 3225 | 3136 | 6.6  | N   | 3159 | 3138 | 36  | 30 | N | R  | SH | UV | M    | N |
| 721 | Sierra Nevada South | CA | Bishop Cr        | Lower Lamarck Lks Gr | TALV | 37.214604 | -118.628273 | 3114 | 3021 | 7.3  | NW  | 3042 | 3021 | 43  | 27 | N | R  | LK | WM | M    | N |
| 722 | Sierra Nevada South | CA | Bishop Cr        | Sabrina Schoeber Lk  | RGC  | 37.182573 | -118.662697 | 3701 | 3647 | 5.7  | NE  | 3659 | 3636 | 49  | 25 | Y | A1 | LK | RK | M    | Y |
| 723 | Sierra Nevada South | CA | Bishop Cr        | Bottleneck Lk        | TALV | 37.184247 | -118.646133 | 3458 | 3411 | 1.6  | NW  | 3429 | 3416 | 21  | 33 | N | A2 | LK | SP | M    | N |
| 724 | Sierra Nevada South | CA | Bishop Cr        | Mt Darwin Hell Diver | TALV | 37.175182 | -118.653079 | 3553 | 3498 | 6.2  | SSE | 3522 | 3499 | 36  | 32 | N | A2 | LK | RK | M    | N |
| 725 | Sierra Nevada South | CA | Bishop Cr        | Mt Darwin Blue Heavi | RGC  | 37.164775 | -118.664083 | 3845 | 3610 | 33.4 | NE  | 3676 | 3613 | 93  | 34 | Y | A1 | LK | RK | M    | Y |
| 726 | Sierra Nevada South | CA | Bishop Cr        | Mt Darwin Midnight L | TALC | 37.164856 | -118.651468 | 3502 | 3354 | 1.7  | NE  | 3455 | 3432 | 39  | 30 | N | A2 | LK |    | M    | Y |
| 727 | Sierra Nevada South | CA | Bishop Cr        | Mt Darwin Hungry Pai | RGC  | 37.153395 | -118.654571 | 3862 | 3593 | 23.4 | N   | 3678 | 3630 | 82  | 30 | N | A1 | LK | RK | M    | Y |
| 728 | Sierra Nevada South | CA | Bishop Cr        | Mt Haeckel Echo Lk   | TALC | 37.144398 | -118.649267 | 3683 | 3634 | 2.9  | E   | 3652 | 3641 | 26  | 24 | N | R  | LK | RK | M    | Y |
| 729 | Sierra Nevada South | CA | Bishop Cr        | Mt Haeckel Echo Lk   | TALC | 37.141408 | -118.642076 | 3678 | 3544 | 2.3  | N   | 3641 | 3585 | 95  | 30 | N | A1 | LK |    | M    | Y |
| 730 | Sierra Nevada South | CA | Bishop Cr        | Mt Powell Moonlight  | RGC  | 37.152271 | -118.631841 | 3797 | 3458 | 61.6 | N   | 3566 | 3434 | 208 | 32 | Y | A1 | LK | RK | M    | Y |
| 731 | Sierra Nevada South | CA | Bishop Cr        | Mt Powell Topsy Turv | TALV | 37.173384 | -118.633691 | 3338 | 3295 | 2.6  | NE  | 3312 | 3297 | 38  | 21 | N | R  | LK |    | M    | N |
| 732 | Sierra Nevada South | CA | Bishop Cr        | Emerald Lakes        | TALV | 37.178336 | -118.629602 | 3238 | 3208 | 0.8  | N   | 3227 | 3204 | 45  | 27 | N | R  | LK | WM | M    | N |
| 733 | Sierra Nevada South | CA | Bishop Cr        | Mt Thompson Sunset   | RGC  | 37.148116 | -118.619738 | 3831 | 3503 | 47.4 | N   | 3718 | 3669 | 83  | 31 | Y | A1 | LK | RK | M    | Y |
| 734 | Sierra Nevada South | CA | Bishop Cr        | Mt Thompson Sunset   | TALV | 37.164972 | -118.615843 | 3486 | 3361 | 5.1  | NW  | 3434 | 3364 | 114 | 32 | N | R  | LK |    | M    | N |
| 735 | Sierra Nevada South | CA | Bishop Cr        | Mt Thompson Blue Lk  | TALV | 37.182489 | -118.616656 | 3323 | 3175 | 5.0  | NW  | 3270 | 3213 | 92  | 32 | N | R  | LK | SH | M    | N |
| 736 | Sierra Nevada South | CA | Bishop Cr        | Little George Lk     | TALV | 37.188891 | -118.611521 | 3262 | 3217 | 1.3  | N   | 3246 | 3220 | 47  | 29 | N | R  | LK |    | M    | N |
| 737 | Sierra Nevada South | CA | Bishop Cr        | Mt Gilbert           | RGC  | 37.143603 | -118.597187 | 3776 | 3551 | 60.5 | NE  | 3576 | 3561 | 23  | 33 | Y | A1 | LK | RK | M    | Y |
| 738 | Sierra Nevada South | CA | Bishop Cr        | Mt Gilbert           | TALC | 37.136691 | -118.586003 | 3623 | 3566 | 0.8  | N   | 3588 | 3567 | 34  | 32 | N | A1 | RK | LK | M    | Y |
| 739 | Sierra Nevada South | CA | Bishop Cr        | Mt Johnson           | RGC  | 37.132697 | -118.582517 | 3639 | 3474 | 16.9 | ENE | 3521 | 3484 | 63  | 30 | Y | A1 | LK | RK | M    | Y |
| 740 | Sierra Nevada South | CA | Bishop Cr        | Mt Johnson           | RGC  | 37.126921 | -118.580287 | 3761 | 3550 | 18.4 | N   | 3626 | 3580 | 84  | 29 | Y | A1 | LK | RK | M    | Y |
| 741 | Sierra Nevada South | CA | Bishop Cr        | Mt Goode             | RGC  | 37.127403 | -118.565180 | 3767 | 3332 | 57.8 | N   | 3366 | 3352 | 21  | 33 | Y | A1 | LK | RK | M    | Y |
| 742 | Sierra Nevada South | CA | Bishop Cr        | Bishop Pass Crest    | TALC | 37.116115 | -118.562334 | 3739 | 3647 | 12.1 | N   | 3661 | 3654 | 53  | 7  | Y | A1 | RK |    | M    | Y |
| 743 | Sierra Nevada South | CA | Bishop Cr        | Bishop Pass Crest    | RGC  | 37.120354 | -118.554511 | 3637 | 3422 | 12.6 | NNE | 3502 | 3460 | 58  | 36 | Y | A1 | LK | RK | M    | Y |
| 744 | Sierra Nevada South | CA | Bishop Cr        | Bishop Lake          | TALV | 37.119692 | -118.547289 | 3456 | 3422 | 3.9  | N   | 3459 | 3442 | 45  | 21 | N | R  | LK | RK | M    | N |
| 745 | Sierra Nevada South | CA | Bishop Cr        | Bishop Pass          | RGC  | 37.118708 | -118.539385 | 3730 | 3506 | 15.5 | NW  | 3548 | 3520 | 40  | 35 | Y | A2 | RK |    | M    | N |
| 746 | Sierra Nevada South | CA | Bishop Cr        | Picture Puzzle Pk    | TALV | 37.13562  | -118.537760 | 3664 | 3530 | 4.7  | NW  | 3548 | 3529 | 30  | 31 | N | R  | RK | UV | M    | N |
| 747 | Sierra Nevada South | CA | Bishop Cr        | Cloudripper Pk       | TALV | 37.142752 | -118.539195 | 3589 | 3462 | 3.2  | NW  | 3515 | 3474 | 57  | 35 | N | R  | RK |    | M    | N |
| 748 | Sierra Nevada South | CA | Bishop Cr        | Inconsoluble Lk      | TALV | 37.159129 | -118.550553 | 3365 | 3338 | 0.5  | NW  | 3363 | 3346 | 29  | 31 | N | R  | UV |    | M    | N |
| 749 | Sierra Nevada South | CA | Bishop Cr        | Brown Lk             | RGC  | 37.159524 | -118.537080 | 3659 | 3529 | 15.2 | N   | 3554 | 3538 | 26  | 32 | Y | A2 | LK | RK | M    | N |
| 750 | Sierra Nevada South | CA | Bishop Cr        | Green Lk             | TALV | 37.166289 | -118.529074 | 3440 | 3383 | 2.5  | NW  | 3412 | 3396 | 27  | 31 | N | A2 | LK | WM | M    | N |
| 751 | Sierra Nevada South | CA | Bishop Cr        | Green Lk             | TALV | 37.169114 | -118.537486 | 3376 | 3314 | 1.7  | NW  | 3355 | 3346 | 21  | 22 | N | R  | SH |    | M    | N |
| 752 | Sierra Nevada South | CA | Bishop Front     | Coyote Ridge         | TALV | 37.178659 | -118.497177 | 3395 | 3236 | 14.5 | NW  | 3298 | 3288 | 23  | 24 | N | R  | UV |    | M    | N |
| 753 | Sierra Nevada South | CA | Bishop Front     | Lower Thunder & Ligh | TALV | 37.161412 | -118.499574 | 3328 | 3303 | 3.2  | SE  | 3330 | 3322 | 32  | 14 | N | R  | UV | LK | M    | N |
| 754 | Sierra Nevada South | CA | Bishop Front     | Sky Haven Pk         | TALC | 37.154888 | -118.499820 | 3480 | 3321 | 34.9 | NE  | 3350 | 3324 | 50  | 27 | Y | A2 | SP | SH | M    | N |
| 755 | Sierra Nevada South | CA | Bishop Front     | Sky Haven Pk         | TALC | 37.147875 | -118.477512 | 3578 | 3301 | 18.9 | NW  | 3420 | 3410 | 21  | 25 | N | R  | UV |    | M    | N |
| 808 | Sierra Nevada South | CA | Coliseum Mtn     | upper canyon         | TALV | 36.90222  | -118.359209 | 3423 | 3085 | 54.1 | NW  | 3219 | 3207 | 28  | 24 | Y | R  | UV |    | M    | N |
| 872 | Sierra Nevada South | CA | Cottonwood Basin | Cottonwood Lk #5     | TALV | 36.507225 | -118.230498 | 3609 | 3454 | 10.7 | SE  | 3513 | 3459 | 90  | 31 | N | R  | LK |    | F, M | N |

|     |                     |    |                  |                       |      |           |             |      |      |      |     |      |      |     |    |   |    |    |    |      |   |
|-----|---------------------|----|------------------|-----------------------|------|-----------|-------------|------|------|------|-----|------|------|-----|----|---|----|----|----|------|---|
| 873 | Sierra Nevada South | CA | Cottonwood Basin | Cottonwood Lk #4      | TALV | 36.498214 | -118.236299 | 3527 | 3441 | 1.1  | E   | 3490 | 3475 | 37  | 22 | N | R  | LK |    | F, M | N |
| 874 | Sierra Nevada South | CA | Cottonwood Basin | Cirque Lk             | RGC  | 36.475164 | -118.221679 | 3484 | 3384 | 24.4 | NE  | 3400 | 3386 | 41  | 19 | Y | R  | LK | UV | F, M | N |
| 875 | Sierra Nevada South | CA | Cottonwood Basin | Cirque Lk             | TALV | 36.469562 | -118.217279 | 3373 | 3350 | 0.5  | NE  | 3365 | 3352 | 28  | 26 | N | R  | SP | WM | F, M | N |
| 806 | Sierra Nevada South | CA | Division Cr      | Mt Perkins upper cirq | RGC  | 36.92719  | -118.372242 | 3200 | 3062 | 31.5 | NE  | 3165 | 3130 | 67  | 28 | Y | R  | UV |    | M    | Y |
| 807 | Sierra Nevada South | CA | Division Cr      | Mt Perkins mid canyo  | TALV | 36.935369 | -118.362217 | 3171 | 2645 | 73.8 | NW  | 2956 | 2929 | 53  | 28 | Y | R  | UV |    | M    | N |
| 836 | Sierra Nevada South | CA | FR 142102        | Upper cyn             | TALV | 36.711753 | -118.322300 | 3188 | 3044 | 4.6  | NNE | 3155 | 3070 | 118 | 36 | N | R  | RK |    | M    | N |
| 800 | Sierra Nevada South | CA | Goodale Cr       | Goodale Mtn           | TALC | 36.978981 | -118.386588 | 3517 | 3367 | 5.4  | N   | 3450 | 3399 | 77  | 34 | N | R  | RK |    | M    | N |
| 695 | Sierra Nevada South | CA | Horton Cyn       | N CYN                 | TALC | 37.314731 | -118.682338 | 3436 | 3377 | 8.4  | N   | 3417 | 3390 | 48  | 30 | N | R  | SP | WM | M    | N |
| 696 | Sierra Nevada South | CA | Horton Cyn       | N CYN                 | TALV | 37.307666 | -118.690970 | 3592 | 3480 | 2.6  | NE  | 3564 | 3532 | 46  | 35 | N | R  | LK | RK | M    | N |
| 697 | Sierra Nevada South | CA | Horton Cyn       | Upper Horton Lks      | RGC  | 37.300036 | -118.684191 | 3475 | 3325 | 22.2 | NE  | 3352 | 3325 | 43  | 32 | Y | A1 | LK |    | M    | Y |
| 698 | Sierra Nevada South | CA | Horton Cyn       | Upper Horton Lks      | RGC  | 37.293596 | -118.682840 | 3657 | 3515 | 7.0  | NE  | 3549 | 3516 | 71  | 25 | Y | A1 | RK | LK | M    | Y |
| 699 | Sierra Nevada South | CA | Horton Cyn       | Upper Horton Lks      | RGC  | 37.295571 | -118.675339 | 3623 | 3488 | 22.5 | NW  | 3507 | 3492 | 19  | 39 | Y | A1 | LK |    | M    | Y |
| 700 | Sierra Nevada South | CA | Horton Cyn       | Upper Horton Lks      | TALV | 37.307985 | -118.673424 | 3353 | 3198 | 9.0  | WNW | 3221 | 3197 | 39  | 32 | N | A2 | SP | LK | M    | N |
| 701 | Sierra Nevada South | CA | Horton Cyn       | Horton Lk             | TALV | 37.298045 | -118.665825 | 3706 | 3584 | 2.6  | NW  | 3623 | 3586 | 62  | 31 | N | R  | RK | SP | M    | N |
| 702 | Sierra Nevada South | CA | Horton Cyn       | Horton Lk             | TALV | 37.312596 | -118.665176 | 3266 | 3034 | 12.5 | NW  | 3054 | 3040 | 23  | 30 | Y | R  | LK | WM | M    | N |
| 703 | Sierra Nevada South | CA | Horton Cyn       | Lower Horton Cyn      | TALV | 37.317458 | -118.640500 | 2758 | 2722 | 0.9  | N   | 2747 | 2725 | 40  | 29 | N | R  | SH | UV | M    | N |
| 851 | Sierra Nevada South | CA | Mt Barnard       |                       | RGC  | 36.626188 | -118.298331 | 3662 | 3379 | 32.1 | NE  | 3411 | 3384 | 38  | 35 | Y | A1 | LK | RK | M    | N |
| 852 | Sierra Nevada South | CA | Mt Tunnabora     | N cirque Vacation Pas | RGC  | 36.609834 | -118.291911 | 3665 | 3503 | 19.3 | NE  | 3547 | 3508 | 55  | 35 | Y | A1 | SP | LK | M    | Y |
| 853 | Sierra Nevada South | CA | Mt Tunnabora     | N cirque              | TALV | 36.619832 | -118.284655 | 3507 | 2931 | 17.7 | NW  | 3223 | 3198 | 41  | 31 | N | A2 | LK | SH | M    | N |
| 854 | Sierra Nevada South | CA | Mt Tunnabora     | S cirque              | RGC  | 36.60178  | -118.273407 | 3740 | 3536 | 9.1  | N   | 3637 | 3578 | 90  | 34 | N | A1 | LK | RK | M    | Y |
| 855 | Sierra Nevada South | CA | Mt Tunnabora     | S cirque              | TALV | 36.606893 | -118.261230 | 3278 | 3203 | 1.5  | N   | 3239 | 3203 | 53  | 34 | N | A2 | SH |    | M    | N |
| 843 | Sierra Nevada South | CA | Mt Tyndall       | Upper cirque          | RGC  | 36.656352 | -118.330191 | 3842 | 3718 | 21.7 | NE  | 3773 | 3722 | 71  | 36 | Y | A1 | LK |    | M    | Y |
| 844 | Sierra Nevada South | CA | Mt Tyndall       | Upper cirque          | RGC  | 36.658727 | -118.324917 | 3669 | 3602 | 2.2  | N   | 3616 | 3607 | 29  | 17 | N | A1 | LK |    | M    | N |
| 846 | Sierra Nevada South | CA | Mt Williamson    | Lk Helen of Troy      | TALC | 36.65545  | -118.320345 | 3865 | 3627 | 9.9  | W   | 3746 | 3728 | 36  | 27 | N | A1 | LK |    | M    | N |
| 847 | Sierra Nevada South | CA | Mt Williamson    | E face                | TALV | 36.662218 | -118.291013 | 3667 | 3221 | 29.6 | NE  | 3540 | 3498 | 61  | 34 | N | A2 | SH | RK | M    | N |
| 848 | Sierra Nevada South | CA | Mt Williamson    | S side                | TALV | 36.648134 | -118.307603 | 3752 | 3687 | 7.6  | S   | 3742 | 3720 | 38  | 30 | N | R  | RK | WM | M    | N |
| 849 | Sierra Nevada South | CA | Mt Williamson    | S side                | RGC  | 36.647957 | -118.312639 | 3854 | 3737 | 4.2  | NE  | 3747 | 3739 | 16  | 26 | N | R  | RK |    | M    | N |
| 814 | Sierra Nevada South | CA | N Oak Cr         | N canyon              | TALC | 36.852151 | -118.351068 | 3289 | 3206 | 13.6 | S   | 3220 | 3210 | 25  | 21 | Y | R  | SP | LK | M    | N |
| 815 | Sierra Nevada South | CA | N Oak Cr         | S canyon              | TALV | 36.830379 | -118.372351 | 3402 | 3334 | 2.4  | SE  | 3375 | 3346 | 58  | 27 | N | R  | SH | UV | M    | N |
| 816 | Sierra Nevada South | CA | N Oak Cr         | Diamond Pk            | RGC  | 36.830146 | -118.387699 | 3640 | 3542 | 14.4 | E   | 3567 | 3547 | 30  | 34 | Y | A1 | RK |    | M    | Y |
| 817 | Sierra Nevada South | CA | N Oak Cr         | Diamond Pk            | TALV | 36.827413 | -118.377834 | 3546 | 3454 | 3.9  | NE  | 3492 | 3472 | 50  | 22 | N | R  | SP | WM | M    | N |
| 818 | Sierra Nevada South | CA | N Oak Cr         | Diamond Pk            | RGC  | 36.820044 | -118.379331 | 3520 | 3453 | 9.5  | N   | 3459 | 3454 | 18  | 16 | Y | R  | WM | RK | M    | N |
| 819 | Sierra Nevada South | CA | N Oak Cr         | Diamond Pk            | TALC | 36.823704 | -118.371564 | 3439 | 3283 | 11.1 | N   | 3298 | 3287 | 19  | 30 | Y | A2 | SP | SH | M    | N |
| 820 | Sierra Nevada South | CA | N Oak Cr         | Diamond Pk            | TALC | 36.821774 | -118.366076 | 3707 | 3444 | 5.7  | W   | 3467 | 3447 | 27  | 37 | Y | A1 | LK | RK | M    | N |
| 824 | Sierra Nevada South | CA | Onion Cr         | Kearsarge Pk          | TALV | 36.785711 | -118.357974 | 3523 | 3380 | 3.7  | S   | 3426 | 3410 | 30  | 27 | N | A2 | WM | SH | M    | N |
| 825 | Sierra Nevada South | CA | Onion Cr         | Dragon Pk             | TALV | 36.787832 | -118.370160 | 3634 | 3483 | 2.6  | NE  | 3554 | 3541 | 22  | 31 | N | A2 | SP | SH | M    | N |
| 826 | Sierra Nevada South | CA | Onion Cr         | Dragon Pk             | TALV | 36.790821 | -118.369910 | 3620 | 3480 | 0.4  | S   | 3527 | 3488 | 73  | 28 | Y | A2 | LK |    | M    | N |
| 827 | Sierra Nevada South | CA | Onion Cr         | Dragon Pk             | TALV | 36.785991 | -118.363294 | 3517 | 3451 | 0.9  | N   | 3480 | 3470 | 16  | 31 | N | R  | LK | WM | M    | N |
| 828 | Sierra Nevada South | CA | Onion Cr         | Golden Trout Lk       | TALV | 36.778723 | -118.361971 | 3518 | 3407 | 2.0  | N   | 3423 | 3415 | 15  | 28 | N | R  | SP | LK | M    | N |
| 829 | Sierra Nevada South | CA | Onion Cr         | Sierra High Route Hea | TALV | 36.766016 | -118.368239 | 3478 | 3393 | 1.4  | N   | 3433 | 3394 | 53  | 36 | N | R  | RK | LK | F, M | N |
| 830 | Sierra Nevada South | CA | Onion Cr         | SHR, Bench Lk         | TALV | 36.759846 | -118.368420 | 3459 | 3387 | 2.1  | E   | 3421 | 3406 | 34  | 24 | N | R  | RK |    | M    | N |
| 831 | Sierra Nevada South | CA | Onion Cr         | University Pk         | TALC | 36.754638 | -118.368122 | 3584 | 3481 | 3.5  | NE  | 3562 | 3540 | 29  | 37 | N | A1 | LK |    | M    | Y |
| 832 | Sierra Nevada South | CA | Onion Cr         | Little Pothole Lk     | TALV | 36.764307 | -118.351881 | 3233 | 3197 | 1.2  | W   | 3217 | 3199 | 36  | 28 | N | R  | SP | WM | F, M | N |
| 822 | Sierra Nevada South | CA | Parker Lks       | Black Mtn             | TALC | 36.807252 | -118.363015 | 3649 | 3301 | 43.8 | SE  | 3477 | 3344 | 218 | 31 | Y | A2 | LK |    | M    | N |

|     |                     |    |                    |                        |        |           |             |      |      |       |    |      |      |     |    |   |    |    |    |   |   |
|-----|---------------------|----|--------------------|------------------------|--------|-----------|-------------|------|------|-------|----|------|------|-----|----|---|----|----|----|---|---|
| 823 | Sierra Nevada South | CA | Parker Lks         | Black Mtn              | TALC   | 36.802095 | -118.362565 | 3466 | 3297 | 43.6  | NE | 3372 | 3357 | 23  | 34 | Y | A1 | LK |    | M | N |
| 801 | Sierra Nevada South | CA | S Goodale Cr       | extensive upper cirque | TALC   | 36.963632 | -118.393551 | 3598 | 3301 | 27.2  | E  | 3422 | 3364 | 84  | 35 | Y | A2 | SP | LK | M | N |
| 802 | Sierra Nevada South | CA | S Goodale Cr       | S cirque               | TALC   | 36.955697 | -118.385362 | 3428 | 3249 | 17.8  | E  | 3345 | 3247 | 157 | 32 | N | R  | LK | WM | M | N |
| 803 | Sierra Nevada South | CA | S Goodale Cr       | S cirque               | TALC   | 36.951144 | -118.382016 | 3377 | 3238 | 10.7  | N  | 3318 | 3299 | 33  | 29 | Y | R  | SP | SH | M | N |
| 804 | Sierra Nevada South | CA | S Goodale Cr       | Mid canyon             | TALV   | 36.953531 | -118.376427 | 3153 | 3047 | 2.2   | N  | 3147 | 3140 | 19  | 22 | N | R  | SP | SH | M | N |
| 821 | Sierra Nevada South | CA | S Oak Cr           | mid-canyon             | TALC   | 36.814984 | -118.350738 | 3372 | 3247 | 5.0   | E  | 3360 | 3301 | 104 | 30 | Y | R  | RK |    | M | N |
| 833 | Sierra Nevada South | CA | S Onion Cr         | Univ Pk, Robinson Lk ( | RGC    | 36.746133 | -118.353420 | 3777 | 3517 | 14.8  | E  | 3558 | 3530 | 41  | 34 | Y | A1 | RK |    | M | Y |
| 834 | Sierra Nevada South | CA | S Onion Cr         | Robinson Lk            | TALV   | 36.757565 | -118.338965 | 3335 | 3147 | 4.9   | W  | 3231 | 3219 | 34  | 20 | N | A2 | LK | SH | M | N |
| 805 | Sierra Nevada South | CA | S S Goodale Cr     | Mid canyon             | TALC   | 36.948063 | -118.370664 | 3263 | 3114 | 9.1   | NE | 3169 | 3142 | 53  | 27 | N | R  | UV |    | M | N |
| 789 | Sierra Nevada South | CA | S Tinemaha Cyn     | Mt Tinemaha            | TALC   | 37.027679 | -118.399900 | 3546 | 3323 | 13.4  | SE | 3336 | 3320 | 30  | 28 | Y | R  | RK | LK | M | N |
| 790 | Sierra Nevada South | CA | S Tinemaha Cyn     | Split Mtn              | RGC    | 37.027901 | -118.416203 | 3704 | 3610 | 3.2   | E  | 3638 | 3626 | 17  | 34 | Y | A1 | RK |    | M | Y |
| 791 | Sierra Nevada South | CA | S Tinemaha Cyn     | Split Mtn              | RGC-PL | 37.027817 | -118.413099 | 3704 | 3495 | 11.0  | E  | 3601 | 3547 | 92  | 30 | N | A2 | RK |    | M | N |
| 792 | Sierra Nevada South | CA | S Tinemaha Cyn     | Split Mtn              | TALV   | 37.01814  | -118.396173 | 3205 | 3092 | 7.3   | N  | 3123 | 3110 | 24  | 28 | N | R  | LK | SH | M | N |
| 793 | Sierra Nevada South | CA | S Tinemaha Cyn     | Cardinal Mtn           | RGC    | 37.009887 | -118.405025 | 3718 | 2968 | 194.0 | E  | 3331 | 3251 | 113 | 35 | Y | A1 | SH | RK | M | Y |
| 794 | Sierra Nevada South | CA | S Tinemaha Cyn     | Cardinal Mtn           | TALV   | 37.010836 | -118.389570 | 3013 | 2962 | 3.9   | N  | 2986 | 2956 | 51  | 30 | N | A2 | SP | SH | M | N |
| 809 | Sierra Nevada South | CA | Sawmill Pk         | upper and mid canyon   | TALV   | 36.896234 | -118.349194 | 3245 | 2901 | 17.5  | N  | 3085 | 3068 | 32  | 28 | Y | R  | UV |    | M | N |
| 837 | Sierra Nevada South | CA | Shephards Pass Cyr | Center Pk              | TALC   | 36.688561 | -118.347663 | 3591 | 3571 | 4.1   | NE | 3584 | 3578 | 14  | 21 | N | R  | RK |    | M | N |
| 838 | Sierra Nevada South | CA | Shephards Pass Cyr | Center Pk              | TALV   | 36.686208 | -118.343998 | 3484 | 3445 | 1.1   | W  | 3468 | 3445 | 40  | 30 | N | R  | SP | SH | M | N |
| 839 | Sierra Nevada South | CA | Shephards Pass Cyr | Shephards Pass         | TALV   | 36.680571 | -118.338693 | 3439 | 3377 | 3.0   | NE | 3442 | 3420 | 30  | 36 | N | R  | SH |    | M | N |
| 840 | Sierra Nevada South | CA | Shephards Pass Cyr | Shephards Pass         | TALV   | 36.684228 | -118.335453 | 3363 | 3575 | 8.1   | NW | 3316 | 3296 | 31  | 32 | N | R  | SH | WM | M | N |
| 841 | Sierra Nevada South | CA | Shephards Pass Cyr | Shephards Pass         | TALV   | 36.688125 | -118.328652 | 3256 | 3131 | 4.2   | NW | 3176 | 3168 | 21  | 21 | N | R  | SP | SH | M | N |
| 842 | Sierra Nevada South | CA | Shephards Pass Cyr | Shephards Pass         | TALV   | 36.678961 | -118.322084 | 3599 | 3121 | 18.8  | NW | 3207 | 3098 | 201 | 28 | N | R  | UV |    | M | N |
| 835 | Sierra Nevada South | CA | SS Onion Cr        | Mt Bradley             | RGC    | 36.737779 | -118.344065 | 3591 | 3468 | 3.3   | N  | 3494 | 3470 | 32  | 37 | N | A1 | RK |    | M | N |
| 795 | Sierra Nevada South | CA | Taboose Cr Cyn     | Striped Mtn            | RGC    | 36.978219 | -118.404241 | 3593 | 3488 | 11.0  | NE | 3560 | 3555 | 22  | 15 | Y | R  | LK | RK | M | N |
| 796 | Sierra Nevada South | CA | Taboose Cr Cyn     | Striped Mtn            | TALC   | 36.975811 | -118.400117 | 3565 | 3497 | 3.0   | NE | 3541 | 3530 | 20  | 29 | Y | R  | LK | RK | M | N |
| 797 | Sierra Nevada South | CA | Taboose Cr Cyn     | Striped Mtn            | TALV   | 36.972431 | -118.390497 | 3622 | 3521 | 5.4   | N  | 3612 | 3595 | 24  | 35 | Y | R  | LK | RK | M | N |
| 798 | Sierra Nevada South | CA | Taboose Cr Cyn     | Main Cyn               | TALV   | 36.986929 | -118.400281 | 3290 | 3179 | 2.9   | NE | 3243 | 3225 | 36  | 26 | N | R  | SH | SP | M | N |
| 799 | Sierra Nevada South | CA | Taboose Cr Cyn     | Main Cyn               | TALV   | 36.988287 | -118.395705 | 3229 | 3061 | 5.2   | NW | 3109 | 3094 | 28  | 28 | N | R  | SH | SP | M | N |
| 781 | Sierra Nevada South | CA | Tinemaha Cyn       | Birch Mtn              | TALV   | 37.054698 | -118.423247 | 3680 | 3645 | 1.3   | S  | 3666 | 3652 | 28  | 26 | N | R  | RK |    | M | N |
| 782 | Sierra Nevada South | CA | Tinemaha Cyn       | Mt Bolton Brown N ci   | RGC    | 37.049422 | -118.421745 | 3746 | 3364 | 40.4  | E  | 3425 | 3382 | 71  | 31 | Y | A1 | WM | SP | M | N |
| 783 | Sierra Nevada South | CA | Tinemaha Cyn       | Mt Bolton Brown maii   | RGC    | 37.045406 | -118.430863 | 3776 | 3583 | 23.3  | E  | 3615 | 3587 | 35  | 39 | Y | A1 | LK | RK | M | Y |
| 784 | Sierra Nevada South | CA | Tinemaha Cyn       | Tinemaha Lk            | RGC    | 37.040778 | -118.424685 | 3758 | 3476 | 33.4  | NE | 3519 | 3478 | 65  | 32 | Y | A1 | LK | RK | M | Y |
| 785 | Sierra Nevada South | CA | Tinemaha Cyn       | Tinemaha Lk            | RGC-PL | 37.044337 | -118.417746 | 3758 | 3524 | 80.0  | NE | 3364 | 3230 | 217 | 32 | Y | R  | WM | SH | M | N |
| 786 | Sierra Nevada South | CA | Tinemaha Cyn       | Tinemaha south Split   | RGC    | 37.035219 | -118.417986 | 3602 | 3392 | 30.4  | NE | 3420 | 3395 | 36  | 35 | Y | A1 | RK |    | M | Y |
| 787 | Sierra Nevada South | CA | Tinemaha Cyn       | Tinemaha south         | RGC    | 37.037511 | -118.409919 | 3271 | 3516 | 12.6  | N  | 3393 | 3364 | 37  | 38 | Y | A1 | RK |    | M | N |
| 788 | Sierra Nevada South | CA | Tinemaha Cyn       | Tinemaha south         | TALC   | 37.044458 | -118.402959 | 3164 | 2902 | 17.4  | NE | 3037 | 2972 | 102 | 33 | Y | R  | WM | SH | M | N |
| 845 | Sierra Nevada South | CA | Trojan Pk          | Lk Helen of Troy       | TALC   | 36.644988 | -118.320299 | 4010 | 3823 | 5.2   | NW | 3890 | 3868 | 36  | 32 | N | A1 | LK |    | M | Y |
| 850 | Sierra Nevada South | CA | Trojan Pk          | E side                 | TALV   | 36.640562 | -118.298191 | 3585 | 3320 | 9.9   | N  | 3475 | 3446 | 52  | 29 | N | R  | SP | WM | M | N |
| 856 | Sierra Nevada South | CA | Tulainyo Lk        | E of lake              | TALV   | 36.599214 | -118.261405 | 3534 | 3463 | 4.2   | E  | 3509 | 3480 | 50  | 30 | N | R  | UV |    | M | N |
| 857 | Sierra Nevada South | CA | Tulainyo Lk        | E of lake              | TALC   | 36.597955 | -118.268757 | 3658 | 3589 | 2.6   | N  | 3617 | 3597 | 32  | 33 | N | A1 | SP | LK | M | N |
| 858 | Sierra Nevada South | CA | Tulainyo Lk        | E of lake              | TALC   | 36.596954 | -118.261153 | 3579 | 3463 | 4.3   | N  | 3498 | 3464 | 55  | 32 | N | A1 | SP | RK | M | Y |
| 861 | Sierra Nevada South | CA | Whitney Portal     | Wotan's Throne         | RGC    | 36.567517 | -118.287488 | 3876 | 3750 | 8.6   | E  | 3795 | 3746 | 68  | 36 | Y | A1 | LK |    | M | Y |
| 862 | Sierra Nevada South | CA | Whitney Portal     | Mt Muir                | RGC    | 36.563155 | -118.285954 | 3869 | 3731 | 11.7  | E  | 3762 | 3732 | 41  | 36 | y | A1 | SP | LK | M | Y |
| 863 | Sierra Nevada South | CA | Whitney Portal     | Mt Muir                | RGC    | 36.559507 | -118.284512 | 3913 | 3811 | 4     | NE | 3849 | 3833 | 29  | 29 | Y | A1 | RK | LK | M | Y |

|     |                     |    |                     |                                |          |           |             |      |      |      |     |      |      |     |    |   |    |    |    |      |   |
|-----|---------------------|----|---------------------|--------------------------------|----------|-----------|-------------|------|------|------|-----|------|------|-----|----|---|----|----|----|------|---|
| 864 | Sierra Nevada South | CA | Whitney Portal      | Consultation Lk Mt M           | RGC      | 36.557493 | -118.273116 | 3781 | 3572 | 19.8 | N   | 3600 | 3587 | 27  | 26 | Y | A1 | LK |    | M    | Y |
| 865 | Sierra Nevada South | CA | Whitney Portal      | Peanut Lk                      | TALV     | 36.558657 | -118.238966 | 3485 | 3273 | 9.0  | NNW | 3428 | 3378 | 68  | 36 | N | A1 | SP | LK | M    | N |
| 866 | Sierra Nevada South | CA | Whitney Portal      | Lone Pine Pk                   | TALV     | 36.546506 | -118.236688 | 3547 | 3389 | 7.2  | N   | 3463 | 3443 | 33  | 31 | N | R  | SP | RK | M    | N |
| 867 | Sierra Nevada South | CA | Whitney Portal      | Mt Le Conte                    | RGC      | 36.539951 | -118.241633 | 3894 | 3706 | 19.0 | E   | 3741 | 3697 | 66  | 34 | Y | A1 | RK |    | M    | Y |
| 868 | Sierra Nevada South | CA | Whitney Portal      | Mt Langley                     | TALV     | 36.529265 | -118.238346 | 3699 | 3545 | 9.7  | N   | 3673 | 3618 | 101 | 29 | N | R  | RK |    | M    | N |
| 869 | Sierra Nevada South | CA | Whitney Portal      | Mt Langley                     | TALV     | 36.521772 | -118.218840 | 3656 | 3613 | 2.2  | E   | 3633 | 3614 | 41  | 25 | N | R  | RK |    | M    | N |
| 870 | Sierra Nevada South | CA | Whitney Portal      | Mt Langley                     | TALV     | 36.518112 | -118.213915 | 3443 | 3436 | 1.3  | N   | 3458 | 3441 | 43  | 21 | N | R  | RK |    | M    | N |
| 871 | Sierra Nevada South | CA | Whitney Portal      | Mt Langley                     | TALV     | 36.505357 | -118.169550 | 3253 | 3237 | 0.2  | NNE | 3253 | 3243 | 21  | 26 | N | R  | RK | UV | M    | N |
| 860 | Sierra Nevada South | CA | Whitney Portal      | Mt Whitney Frog Pond           | RGC      | 36.576814 | -118.284435 | 3812 | 3688 | 18.9 | E   | 3765 | 3755 | 18  | 30 | Y | A1 | LK | SP | M    | Y |
| 859 | Sierra Nevada South | CA | Whitney Portal N    | Mt Russell                     | TALC     | 36.58517  | -118.282673 | 3719 | 3630 | 3.6  | N   | 3655 | 3634 | 43  | 27 | N | A2 | LK | SP | M    | Y |
| 175 | Silver Peak Range   | NV | Red Mtn             | NE slopes                      | RGC      | 37.766604 | -117.753526 | 2385 | 2061 | 13.8 | ENE | 2275 | 2248 | 47  | 30 | Y | R  | UV |    | F, M | N |
| 176 | Silver Peak Range   | NV | Red Mtn             | NE slopes                      | RGC      | 37.761926 | -117.752351 | 2480 | 2125 | 16.8 | E   | 2117 | 2089 | 39  | 36 | N | R  | UV |    | F, M | N |
| 177 | Silver Peak Range   | NV | Red Mtn             | NE slopes                      | RGC      | 37.758965 | -117.748993 | 2205 | 2078 | 9.5  | E   | 2125 | 2079 | 79  | 30 | Y | R  | UV |    | F, M | N |
| 178 | Snake Mountains     | NV | Loomis Mt           | Just inside GB                 | ISR-slum | 41.438572 | -114.980325 | 2463 | 2269 | 28.2 | E   | 2256 | 2221 | 81  | 23 | N | R  | AS | UV | F, M | N |
| 203 | Snake Range North   | NV | Mt Moriah           | NW Cirque                      | TALV     | 39.286028 | -114.200456 | 3211 | 3120 | 4.8  | SW  | 3181 | 3172 | 20  | 22 | Y | R  | UV |    | M    | N |
| 201 | Snake Range North   | NV | SS Smith Crk        | center of cirque               | TALC     | 39.301743 | -114.184152 | 3120 | 3013 | 3.6  | W   | 3040 | 3014 | 66  | 22 | N | R  | UV |    | M    | N |
| 202 | Snake Range North   | NV | SS Smith Crk        | below center cirque            | TALV     | 39.301178 | -114.181786 | 3007 | 2992 | 0.4  | W   | 2988 | 2976 | 45  | 15 | N | R  | UV |    | M    | N |
| 190 | Snake Range South   | NV | Baker Pk            | South shoulder                 | TALV     | 38.962575 | -114.297623 | 3402 | 3079 | 4.3  | SE  | 3121 | 3099 | 33  | 33 | N | R  | UV |    | M    | N |
| 191 | Snake Range South   | NV | Baker Pk            | Main cirque with lake          | TALC     | 38.956744 | -114.308473 | 3260 | 3238 | 1.0  | NE  | 3261 | 3239 | 38  | 30 | N | R  | LK | WM | F, M | N |
| 192 | Snake Range South   | NV | Baker Pk            | Main cirque with lake          | TALC     | 38.957592 | -114.312823 | 3259 | 3240 | 0.5  | E   | 3265 | 3246 | 44  | 24 | N | R  | LK |    | F, M | N |
| 193 | Snake Range South   | NV | Baker Pk            | South shoulder                 | TALV     | 38.953389 | -114.304655 | 3335 | 3237 | 0.5  | NE  | 3254 | 3242 | 30  | 22 | N | R  | WM | SH | F, M | N |
| 179 | Snake Range South   | NV | Bald Mtn            | S cirque                       | TALV     | 39.029358 | -114.318917 | 3090 | 3063 | 2.5  | N   | 3075 | 3061 | 30  | 26 | N | R  | UV |    | M    | N |
| 194 | Snake Range South   | NV | Pyramid Pk          | North shoulder                 | TALV     | 38.954846 | -114.300992 | 3202 | 3191 | 0.2  | N   | 3199 | 3197 | 11  | 13 | N | R  | WM |    | F, M | N |
| 195 | Snake Range South   | NV | Pyramid Pk          | North shoulder                 | TALV     | 38.955517 | -114.297089 | 3154 | 3125 | 0.4  | NE  | 3152 | 3133 | 41  | 24 | N | R  | WM | UV | F, M | N |
| 196 | Snake Range South   | NV | Pyramid Pk          | N asp E shoulder               | TALV     | 38.964052 | -114.290110 | 3091 | 2977 | 5.7  | NW  | 2987 | 2973 | 36  | 21 | N | R  | UV |    | F, M | N |
| 197 | Snake Range South   | NV | Pyramid Pk          | N asp E shoulder               | TALV     | 38.971367 | -114.274254 | 2821 | 2798 | 0.5  | N   | 2819 | 2801 | 31  | 29 | N | R  | UV |    | F, M | N |
| 198 | Snake Range South   | NV | Pyramid Pk          | E asp cirque                   | TALC     | 38.950923 | -114.288300 | 3293 | 3228 | 2.1  | E   | 3235 | 3229 | 15  | 21 | N | R  | UV | WM | M    | N |
| 199 | Snake Range South   | NV | Pyramid Pk          | Johnson Lk cirque              | TALV     | 38.943861 | -114.294213 | 3337 | 3251 | 4.0  | SE  | 3304 | 3278 | 48  | 29 | N | R  | LK | WM | F, M | N |
| 200 | Snake Range South   | NV | Pyramid Pk          | Johnson Lk cirque              | TALV     | 38.940439 | -114.295801 | 3310 | 3252 | 4.1  | N   | 3317 | 3286 | 68  | 24 | N | R  | UV |    | M    | N |
| 180 | Snake Range South   | NV | Wheeler Pk          | Teresa Lake Cirque W           | RGC      | 38.998985 | -114.314427 | 3281 | 3219 | 1.7  | N   | 3242 | 3229 | 24  | 28 | Y | A2 | LK | SP | F, M | N |
| 181 | Snake Range South   | NV | Wheeler Pk          | Teresa Lake Cirque Ce          | RGC      | 38.99839  | -114.313029 | 3338 | 3223 | 2.4  | NE  | 3245 | 3235 | 19  | 28 | N | A2 | LK | SP | F, M | N |
| 182 | Snake Range South   | NV | Wheeler Pk          | Teresa Lake Cirque W           | TALC     | 38.999576 | -114.310727 | 3237 | 3183 | 2.1  | NW  | 3207 | 3201 | 11  | 30 | Y | R  | LK | SP | F, M | N |
| 183 | Snake Range South   | NV | Wheeler Pk          | Wheeler Main Cirque            | GC-activ | 38.989333 | -114.308468 | 3491 | 3332 | 14.7 | N   | 3292 | 3286 | 23  | 15 | Y | A1 | RK | UV | F, M | Y |
| 184 | Snake Range South   | NV | Wheeler Pk          | Wheeler Main Cirque            | RGC      | 38.991455 | -114.307326 | 3491 | 3256 | 21.6 | N   | 3329 | 3316 | 31  | 22 | Y | A1 | RK | UV | F, M | Y |
| 185 | Snake Range South   | NV | Wheeler Pk          | Wheeler Main Cirque E, old & r | RGC      | 38.997028 | -114.304014 | 3491 | 3124 | 43.0 | N   | 3210 | 3201 | 22  | 23 | Y | R  | RK | UV | F, M | Y |
| 186 | Snake Range South   | NV | Wheeler Pk          | Wheeler East Ridge             | TALV     | 38.998291 | -114.298549 | 3319 | 3213 | 5.4  | NW  | 3300 | 3290 | 36  | 15 | N | R  | UV |    | F, M | N |
| 187 | Snake Range South   | NV | Wheeler Pk          | Wheeler South Cirque           | TALC     | 38.97514  | -114.315193 | 3373 | 3346 | 1.7  | E   | 3372 | 3356 | 39  | 22 | N | R  | WM |    | M    | N |
| 188 | Snake Range South   | NV | Wheeler Pk          | Wheeler South Cirque           | RGC      | 38.972721 | -114.309139 | 3384 | 3234 | 14.6 | NE  | 3299 | 3278 | 47  | 24 | Y | R  | UV |    | M    | N |
| 189 | Snake Range South   | NV | Wheeler Pk          | Wheeler South Cirque           | TALV     | 38.973326 | -114.300793 | 3445 | 3168 | 1.0  | N   | 3206 | 3202 | 26  | 9  | N | R  | UV |    | M    | N |
| 212 | Steens Mountains    | OR | Big Indian Ridge    | First E-W Ridge on N           | TALC     | 42.647462 | -118.627047 | 2535 | 2507 | 0.2  | N   | 2522 | 2512 | 21  | 25 | N | R  | SH |    | M    | N |
| 205 | Steens Mountains    | OR | Kiger Gorge         | E slope N of Steens Pk         | TALV     | 42.728164 | -118.577532 | 2597 | 2553 | 2.1  | NE  | 2588 | 2574 | 47  | 16 | N | R  | LK |    | M    | N |
| 206 | Steens Mountains    | OR | N Steens Pk         | NNE cirque N Steens Pk         | TALC     | 42.697627 | -118.564175 | 2640 | 2629 | 0.9  | E   | 2643 | 2629 | 36  | 21 | N | R  | AS | SH | M    | N |
| 207 | Steens Mountains    | OR | N Steens Pk         | NE cirque N Steens Pk          | pk/mora  | 42.692511 | -118.561050 | 2626 | 2583 | 1.0  | NE  | 2600 | 2554 | 71  | 33 | N | R  | AS | SH | M    | N |
| 213 | Steens Mountains    | OR | S of Big Indian Cyn | Outer ridge cirque             | TALC     | 42.6333   | -118.620714 | 2508 | 2472 | 0.7  | N   | 2488 | 2473 | 33  | 26 | N | R  | SH |    | M    | N |

|     |                      |    |                 |                         |       |           |             |      |      |      |       |       |         |       |    |           |     |    |    |      |   |
|-----|----------------------|----|-----------------|-------------------------|-------|-----------|-------------|------|------|------|-------|-------|---------|-------|----|-----------|-----|----|----|------|---|
| 208 | Steens Mountains     | OR | S Steens Crest  | E cirque S of Steens Pl | TALC  | 42.678391 | -118.560410 | 2633 | 2582 | 2.4  | E     | 2626  | 2578    | 96    | 27 | N         | R   | AS | SH | M    | N |
| 209 | Steens Mountains     | OR | S Steens Crest  | E cirque S of Steens Pl | TALC  | 42.685044 | -118.560209 | 2778 | 2752 | 0.3  | E     | 2769  | 2745    | 46    | 27 | N         | R   | RK |    | M    | N |
| 210 | Steens Mountains     | OR | S Steens Crest  | E cirque S of Steens Pl | TALC  | 42.670684 | -118.567363 | 2839 | 2750 | 1.0  | E     | 2815  | 2787    | 52    | 27 | N         | R   | SH |    | M    | N |
| 211 | Steens Mountains     | OR | S Steens Crest  | E cirque S of Steens Pl | TALC  | 42.669446 | -118.561919 | 2766 | 2644 | 11.3 | NE    | 2704  | 2669    | 48    | 36 | Y shallow | A2  | LK | SP | M    | Y |
| 215 | Strawberry Mountains | OR | Little Slide Lk |                         | TALV  | 44.28665  | -118.663133 | 2230 | 2210 | 0.6  | N     | 2225  | 2211    | 32    | 23 | N         | R   | LK |    | M    | N |
| 214 | Strawberry Mountains | OR | Strawberry Lk   |                         | TALC  | 44.297689 | -118.672513 | 2360 | 2261 | 3.6  | N     | 2326  | 2316    | 24    | 21 | N         | R   | UV | RK | M    | N |
| 219 | Sweetwater Mountains | CA | Mt Patterson    | Sweetwater Cyn          | TALV  | 38.439985 | -119.287466 | 3136 | 3113 | 0.5  | N     | 3131  | 3111    | 35    | 30 | Y shallow | R   | UV |    | F, M | N |
| 222 | Sweetwater Mountains | CA | Mt Patterson W  | Montague Mine Cyn       | BSR   | 38.443388 | -119.329010 | 3221 | 3136 | 1.0  | N     | 3175  | 3167    | 21    | 22 | F         | A2? | SH |    | F, M | N |
| 216 | Sweetwater Mountains | CA | Mt Wheeler      | Ferris Cyn cirque       | RGC   | 38.428085 | -119.291875 | 3215 | 3096 | 13.0 | E     | 3177  | 3159    | 51    | 19 | Y         | A1  | SH |    | F, M | N |
| 217 | Sweetwater Mountains | CA | Mt Wheeler      | Ferris Cyn              | TALV  | 38.43208  | -119.281717 | 3105 | 2927 | 17.0 | E     | 3051  | 3015    | 67    | 28 | N         | R   | SH |    | F, M | N |
| 218 | Sweetwater Mountains | CA | Mt Wheeler      | Ferris Cyn N asp        | RGC   | 38.430096 | -119.278764 | 3157 | 2964 | 13.0 | N     | 2986  | 2954    | 49    | 33 | Y         | A2  | SH |    | F, M | N |
| 220 | Sweetwater Mountains | CA | S Sister        | W asp Cyn, S of SS      | Slump | 38.468981 | -119.309992 | 3176 | 3096 | 22.0 | NW    | ##### | #VALUE! | ##### | NA | N         | A2? | LK | WM | F, M | N |
| 221 | Sweetwater Mountains | CA | S Sister        | W asp Cyn, S of SS      | TALV  | 38.46454  | -119.312763 | 3191 | 3156 | 1.2  | NW    | 3172  | 3168    | 11    | 20 | N         | R   | WM | UV | F, M | N |
| 223 | Sweetwater Mountains | CA |                 | E Fk Desert Cr          | BSR   | 38.46384  | -119.328931 | 2999 | 2925 | 4.1  | NW    | 2945  | 2937    | 19    | 23 | N         | R   | UP |    | F, M | N |
| 224 | Sweetwater Mountains | CA |                 | E Fk Desert Cr          | BSR   | 38.393935 | -119.333242 | 2768 | 2688 | 8.0  | SSE   | 2694  | 2691    | 11    | 16 | Y         | A2  | AS |    | F, M | N |
| 227 | Toiyabe Range        | NV | Arc Dome        | NNE crest               | TALC  | 38.87786  | -117.343888 | 3045 | 3008 | 0.8  | NE    | 3031  | 3007    | 44    | 28 | Old       | R   | SH | AS | M    | N |
| 228 | Toiyabe Range        | NV | Arc Dome        | NNW crest               | RGC   | 38.87276  | -117.359088 | 3236 | 3180 | 4.6  | NNW   | 3213  | 3192    | 30    | 33 | N         | R   | WM |    | F, M | N |
| 229 | Toiyabe Range        | NV | Arc Dome        | NNW crest               | TALV  | 38.87452  | -117.358317 | 3200 | 3195 | 1.3  | W     | 3201  | 3187    | 23    | 31 | N         | R   | RK |    | F, M | N |
| 230 | Toiyabe Range        | NV | Arc Dome        | NNW crest               | TALV  | 38.874174 | -117.361248 | 3173 | 3156 | 1.5  | E     | 3171  | 3160    | 22    | 28 | N         | R   | RK |    | F, M | N |
| 231 | Toiyabe Range        | NV | Arc Dome        | NNW crest (Twin Fk C    | RGC   | 38.863529 | -117.349734 | 3258 | 3154 | 24.1 | E     | 3183  | 3152    | 42    | 36 | Y         | A2  | WM | AS | F, M | N |
| 232 | Toiyabe Range        | NV | Arc Dome        | NNW crest (Twin Fk C    | RGC   | 38.863443 | -117.339054 | 3052 | 3002 | 2.5  | N     | 3023  | 3012    | 23    | 26 | N         | R   | AS |    | F, M | N |
| 233 | Toiyabe Range        | NV | Arc Dome        | NW crest                | TALC  | 38.841268 | -117.357822 | 3171 | 3135 | 0.8  | N     | 3154  | 3150    | 9     | 22 | N         | R   | RK |    | F, M | N |
| 234 | Toiyabe Range        | NV | Arc Dome        | NW crest                | TALV  | 38.842483 | -117.356819 | 3133 | 3120 | 0.8  | NW    | 3112  | 3101    | 19    | 32 | N         | R   | RK | UV | F, M | N |
| 235 | Toiyabe Range        | NV | Arc Dome        | NW crest                | TALV  | 38.843444 | -117.358467 | 3114 | 3097 | 0.5  | NE    | 3093  | 3081    | 21    | 30 | N         | R   | RK | UV | F, M | N |
| 236 | Toiyabe Range        | NV | Arc Dome        | E cirque                | RGC   | 38.834875 | -117.343147 | 3205 | 3097 | 12.9 | E     | 3147  | 3141    | 21    | 17 | Y         | A2  | UV |    | F, M | N |
| 238 | Toiyabe Range        | NV | Arc Dome        | N ridge                 | TALV  | 38.843528 | -117.358463 | 3096 | 3071 | 0.7  | N     | 3092  | 3080    | 23    | 28 | N         | R   | SH |    | F, M | N |
| 239 | Toiyabe Range        | NV | Arc Dome        | N ridge                 | TALV  | 38.844919 | -117.359046 | 3057 | 3036 | 0.2  | NE    | 3050  | 3036    | 23    | 31 | N         | R   | UV |    | F, M | N |
| 240 | Toiyabe Range        | NV | Arc Dome        | NNW crest (Twin Fk C    | RGC   | 38.860865 | -117.346690 | 3224 | 3151 | 1.6  | N     | 3223  | 3193    | 56    | 28 | Old       | A2? | SP | WM | F, M | N |
| 237 | Toiyabe Range        | NV | Arc Dome 11     | E ridge                 | BSR   | 38.836348 | -117.330841 | 2929 | 2857 | 1.4  | N     | 2863  | 2858    | 11    | 26 | N         | R   | UV |    | F, M | N |
| 241 | Toiyabe Range        | NV | Arc Dome 15     | S crest N Twin Cirque   | TALV  | 38.876937 | -117.353545 | 3226 | 3181 | 0.7  | E     | 3204  | 3194    | 29    | 19 | N         | R   | RK |    | F, M | N |
| 242 | Toiyabe Range        | NV | Arc Dome 16     | W cirque N of plateau   | TALV  | 38.879678 | -117.363624 | 3081 | 3034 | 1.4  | NE    | 3048  | 3043    | 15    | 18 | N         | R   | AS |    | F, M | N |
| 225 | Toiyabe Range        | NV | Bunker Hill     | E summit slope          | TALC  | 39.248842 | -117.121466 | 3248 | 3206 | 0.6  | N     | 3225  | 3203    | 47    | 25 | N         | R   | RK |    | M    | N |
| 226 | Toiyabe Range        | NV | Bunker Hill     | E summit slope          | TALC  | 39.249029 | -117.118974 | 3165 | 3132 | 0.8  | N     | 3152  | 3130    | 38    | 29 | N         | R   | RK |    | M    | N |
| 248 | Toiyabe Range        | NV | Mahogany Pk     | NNE summit              | TALC  | 38.773005 | -117.288929 | 3110 | 2907 | 10.5 | NW    | 3030  | 3015    | 22    | 35 | Y         | A2? | RK |    | M    | N |
| 249 | Toiyabe Range        | NV | Mahogany Pk     | E cirque                | BSR   | 38.759211 | -117.304254 | 3105 | 3071 | 0.5  | E     | 3093  | 3087    | 16    | 20 | N         | R   | UV |    | M    | N |
| 244 | Toiyabe Range        | NV | Ophir Pass      | Ridge below pass        | BSR   | 38.950713 | -117.342018 | 2921 | 2858 | 3.3  | N     | 2870  | 2869    | 4     | 9  | N         | R   | AS |    | M    | N |
| 245 | Toiyabe Range        | NV | Ophir Pass      | Ridge below pass        | BSR   | 38.953909 | -117.343395 | 2846 | 2726 | 8.5  | N, NW | 2748  | 2746    | 6     | 15 | N         | R   | AS |    | M    | N |
| 246 | Toiyabe Range        | NV | Ophir Pass      | Ridge below pass        | BSR   | 38.951424 | -117.346901 | 2785 | 2764 | 0.2  | N     | 2773  | 2772    | 3     | 15 | N         | R   | AS |    | M    | N |
| 243 | Toiyabe Range        | NV | Toiyabe Dome    | NE cirque               | TALC  | 38.802845 | -117.256359 | 3353 | 3301 | 1.3  | W     | 3335  | 3321    | 22    | 32 | N         | R   | UV | RK | M    | N |
| 247 | Toiyabe Range        | NV | Toiyabe Dome    | NE cirque               | TALC  | 38.803401 | -117.245884 | 2798 | 2970 | 1.9  | NW    | 3020  | 2996    | 55    | 23 | N         | R   | UV |    | M    | N |
| 250 | Toquima Range        | NV | N Jefferson     | Wmost cirque            | TALC  | 38.820294 | -116.952495 | 3082 | 3011 | 1.8  | N     | 3041  | 3027    | 28    | 26 | N         | R   | UV | WM | M    | N |
| 251 | Toquima Range        | NV | N Jefferson     | Mid W cirque            | RGC   | 38.822022 | -116.945889 | 3161 | 2972 | 4.9  | NW    | 3078  | 3045    | 82    | 22 | N         | R   | UV | WM | M    | N |
| 252 | Toquima Range        | NV | N Jefferson     | Moore's Cyn cirque      | RGC   | 38.816741 | -116.929228 | 3167 | 3092 | 3.6  | N     | 3123  | 3112    | 16    | 35 | Y         | A2  | UV | WM | F, M | N |
| 253 | Toquima Range        | NV | N Jefferson     | Moore's Cyn cirque      | RGC   | 38.81427  | -116.929036 | 3329 | 3161 | 5.5  | N     | 3197  | 3183    | 21    | 33 | Y         | A2  | RK |    | F, M | N |

|     |                  |    |                                            |                        |      |           |             |      |      |      |     |      |      |    |    |   |     |    |    |      |   |
|-----|------------------|----|--------------------------------------------|------------------------|------|-----------|-------------|------|------|------|-----|------|------|----|----|---|-----|----|----|------|---|
| 254 | Toquima Range    | NV | N Jefferson                                | Moores Cyn cirque      | TALC | 38.812444 | -116.936038 | 3345 | 3306 | 0.4  | E   | 3338 | 3326 | 26 | 26 | N | A2? | RK |    | F, M | N |
| 255 | Toquima Range    | NV | N Jefferson                                | Moores Cyn cirque      | TALV | 38.818135 | -116.926206 | 3201 | 3045 | 4.9  | WNW | 3146 | 3138 | 18 | 23 | N | A2? | RK | WM | F, M | N |
| 256 | Toquima Range    | NV | N Jefferson                                | Moores Trail cirque    | TALV | 38.818836 | -116.936220 | 3294 | 3229 | 0.8  | NE  | 3263 | 3255 | 37 | 11 | N | R   | RK | SH | F, M | N |
| 261 | Toquima Range    | NV | N Pine Cr Cirque                           | N subcirque            | TALC | 38.790265 | -116.928281 | 3368 | 3253 | 2.8  | ESE | 3267 | 3260 | 20 | 21 | N | R   | RK | WM | M    | N |
| 262 | Toquima Range    | NV | N Pine Cr Cirque                           | Main cirque            | TALC | 38.782094 | -116.929974 | 3300 | 3260 | 1.1  | N   | 3283 | 3263 | 36 | 29 | N | R   | WM |    | F, M | N |
| 260 | Toquima Range    | NV | Outer Pasco                                | Minor cirque valley    | TALV | 38.801443 | -116.904593 | 3083 | 2961 | 1.7  | ENE | 2970 | 2964 | 15 | 22 | N | A2  | SH |    | F, M | N |
| 257 | Toquima Range    | NV | Pasco Cyn                                  | Main cirque S ridge    | TALV | 38.801953 | -116.921573 | 3262 | 3230 | 0.5  | N   | 3242 | 3234 | 17 | 26 | N | R   | RK |    | F, M | N |
| 258 | Toquima Range    | NV | Pasco Cyn                                  | S cirque               | TALV | 38.800982 | -116.914957 | 3236 | 3118 | 2.0  | N   | 3127 | 3125 | 6  | 24 | N | R   | UV |    | F, M | N |
| 259 | Toquima Range    | NV | Pasco Cyn                                  | S cirque               | TALV | 38.803382 | -116.910097 | 3046 | 2994 | 0.7  | N   | 3010 | 2998 | 20 | 31 | N | R   | UV |    | F, M | N |
| 264 | Toquima Range    | NV | SS Fk Pine Cr                              | N ridge of cirque      | TALV | 38.760879 | -116.924949 | 3356 | 3301 | 1.0  | E   | 3344 | 3331 | 27 | 26 | N | R   | RK |    | F, M | N |
| 265 | Toquima Range    | NV | SS Fk Pine Cr                              | N ridge of cirque      | TALV | 38.762046 | -116.923130 | 3305 | 3265 | 0.5  | E   | 3296 | 3277 | 31 | 31 | N | R   | WM | SH | F, M | N |
| 266 | Toquima Range    | NV | SS Fk Pine Cr                              | S ridge of cirque      | TALV | 38.759711 | -116.920165 | 3257 | 3217 | 0.4  | N   | 3234 | 3230 | 17 | 13 | N | R   | WM | RK | F, M | N |
| 263 | Toquima Range    | NV | Tarn Fk                                    | S ridge of cirque      | TALV | 38.770432 | -116.925133 | 3265 | 3134 | 7.3  | N   | 3199 | 3191 | 25 | 17 | N | R   | WM |    | F, M | N |
| 272 | Tushar Mountains | UT | Blue Lk                                    |                        | TALV | 38.403786 | -112.427219 | 3247 | 3355 | 4.1  | NE  | 3315 | 3300 | 27 | 28 | N | R   | UV |    | M    | N |
| 275 | Tushar Mountains | UT | Delano Pk                                  |                        | TALC | 38.380526 | -112.374041 | 3417 | 3336 | 1.0  | NE  | 3371 | 3351 | 33 | 31 | N | R   | WM |    | M    | N |
| 276 | Tushar Mountains | UT | Delano Pk                                  |                        | TALC | 38.382911 | -112.370959 | 3346 | 3243 | 7.6  | N   | 3272 | 3256 | 29 | 29 | Y | A2  | WM |    | M    | N |
| 277 | Tushar Mountains | UT | Delano Pk                                  |                        | RGC  | 38.357683 | -112.354088 | 3383 | 3217 | 11.3 | NE  | 3252 | 3242 | 15 | 31 | Y | A2  | UV |    | M    | Y |
| 279 | Tushar Mountains | UT | Delano Pk                                  | Ridge to east          | TALC | 38.37617  | -112.360952 | 3338 | 3284 | 1.5  | N   | 3322 | 3306 | 37 | 24 | N | R   | WM | SH | M    | N |
| 271 | Tushar Mountains | UT | Mt Baldy                                   | NE of Mt Baldy         | TALC | 38.425041 | -112.419297 | 3339 | 3122 | 14.2 | N   | 3239 | 3226 | 29 | 25 | Y | R   | UV |    | M    | N |
| 273 | Tushar Mountains | UT | Mt Baldy                                   |                        | RGC  | 38.408611 | -112.428157 | 3261 | 3100 | 4.0  | NW  | 3121 | 3115 | 13 | 24 | Y | A2? | UV |    | M    | N |
| 268 | Tushar Mountains | UT | Mt Belknap                                 | NE slopes              | TALV | 38.421962 | -112.407314 | 3434 | 3345 | 6.3  | NE  | 3398 | 3355 | 98 | 24 | N | R   | UV |    | M    | N |
| 274 | Tushar Mountains | UT | Shelly Baldy Pk                            |                        | RGC  | 38.365488 | -112.420189 | 3333 | 3219 | 18.3 | WSW | 3230 | 3183 | 40 | 49 | Y | R   | UV |    | M    | N |
| 278 | Tushar Mountains | UT | Shelly Baldy Pk                            |                        | TALV | 38.365356 | -112.431513 | 3240 | 3071 | 4.5  | SW  | 3127 | 3122 | 8  | 30 | N | R   | AS |    | M    | N |
| 269 | Tushar Mountains | UT | Signal Pk                                  |                        | RGC  | 38.461344 | -112.395990 | 3296 | 3259 | 4.3  | NE  | 3275 | 3267 | 20 | 22 | N | R   | UV |    | M    | N |
| 270 | Tushar Mountains | UT | Signal Pk                                  |                        | RGC  | 38.466331 | -112.402100 | 3327 | 3166 | 10.9 | N   | 3190 | 3182 | 15 | 27 | N | R   | UV | RK | M    | N |
| 311 | Uinta Mountains  | UT | A-1 Pk                                     | Hell Hole Lk           | TALV | 40.778218 | -110.836763 | 3335 | 3132 | 18.7 | NW  | 3173 | 3149 | 41 | 29 | N | R   | WM | UV | M    | N |
| 301 | Uinta Mountains  | UT | A-I Peak                                   | East Ridge             | TALV | 40.776646 | -110.820278 | 3331 | 3199 | 5.1  | ENE | 3234 | 3224 | 27 | 21 | N | A2? | UV | LK | M    | N |
| 303 | Uinta Mountains  | UT | Alsop Lake                                 | Downcyn from lake      | RGC  | 40.781123 | -110.706620 | 3349 | 3244 | 8.0  | N   | 3283 | 3257 | 46 | 30 | Y | A2  | WM | UV | M    | N |
| 281 | Uinta Mountains  | UT | Big Elk Lk                                 |                        | TALV | 40.671487 | -111.055704 | 3082 | 3078 | 5.6  | E   | 3094 | 3087 | 23 | 16 | N | R   | LK |    | M    | N |
| 288 | Uinta Mountains  | UT | E Shingle Lk                               | N of lake across ridge | TALV | 40.686709 | -111.081380 | 3021 | 3029 | 3.8  | N   | 3053 | 3037 | 32 | 26 | N | R   | UV |    | M    | N |
| 299 | Uinta Mountains  | UT | Hayden Pk                                  |                        | RGC  | 40.740836 | -110.830995 | 3311 | 3209 | 7.1  | N   | 3230 | 3208 | 30 | 36 | N | A2  | WM | LK | M    | N |
| 300 | Uinta Mountains  | UT | Hayden Pk                                  | Above unnamed lake     | RGC  | 40.744567 | -110.843519 | 3368 | 3319 | 2.0  | NE  | 3352 | 3346 | 20 | 16 | N | R   | UV |    | M    | N |
| 309 | Uinta Mountains  | UT | Hayden Pk                                  | Kermisuh Lk            | TALV | 40.753914 | -110.819982 | 3220 | 3096 | 15.3 | NW  | 3201 | 3180 | 48 | 23 | N | R   | UV |    | M    | N |
| 289 | Uinta Mountains  | UT | Haystack Mtn                               | Azure Lk               | TALV | 40.656856 | -110.982398 | 3139 | 3099 | 1.7  | E   | 3123 | 3108 | 34 | 25 | N | R   | LK |    | M    | N |
| 290 | Uinta Mountains  | UT | Haystack Mtn                               | Rock Lk                | TALV | 40.662856 | -110.982382 | 3217 | 3172 | 2.9  | E   | 3187 | 3170 | 32 | 27 | N | R   | UV |    | M    | N |
| 291 | Uinta Mountains  | UT | Haystack Mtn                               | S end of ridge         | TALV | 40.648416 | -111.006302 | 2987 | 2963 | 1.0  | WSW | 2988 | 2975 | 28 | 25 | N | R   | UV |    | M    | N |
| 292 | Uinta Mountains  | UT | Haystack Mtn                               | S end of ridge, N asp  | TALV | 40.653201 | -111.000280 | 3064 | 2997 | 6.4  | N   | 3053 | 3032 | 41 | 27 | N | R   | UV |    | M    | N |
| 285 | Uinta Mountains  | UT | Hidden Lk (ridge ea entire length of crest |                        | TALV | 40.648677 | -111.050195 | 2966 | 2744 | 14.3 | WNW | 2820 | 2806 | 27 | 27 | N | R   | UV |    | M    | N |
| 280 | Uinta Mountains  | UT | Hourglass Lk                               |                        | TALV | 40.657783 | -111.073110 | 3025 | 2966 | 9.0  | SE  | 3000 | 3000 | 8  | 2  | N | R   | LK | UV | M    | N |
| 297 | Uinta Mountains  | UT | Kamas Lk                                   | S of lake and mountai  | TALV | 40.721241 | -110.898669 | 3182 | 3147 | 0.5  | SW  | 3181 | 3169 | 25 | 25 | N | R   | UV |    | M    | N |
| 298 | Uinta Mountains  | UT | Kamas Lk                                   | Above lake             | TALV | 40.725838 | -110.898756 | 3239 | 3206 | 2.6  | NW  | 3218 | 3206 | 36 | 18 | N | R   | LK |    | M    | N |
| 310 | Uinta Mountains  | UT | Kletting Pk                                | Hell Hole Lk           | TALV | 40.773393 | -110.855890 | 3457 | 3257 | 14.8 | NE  | 3278 | 3261 | 39 | 23 | N | R   | WM | LK | M    | N |
| 312 | Uinta Mountains  | UT | Kletting Pk                                | Hell Hole Lk           | TALV | 40.790017 | -110.846412 | 3224 | 3079 | 11.2 | E   | 3186 | 3176 | 31 | 17 | N | R   | WM | LK | M    | N |
| 282 | Uinta Mountains  | UT | Lower Shingle Cr Lk W of the lake at end c |                        | RGC  | 40.657781 | -111.084657 | 2972 | 2851 | 13.0 | WNW | 2905 | 2872 | 50 | 34 | N | R   | UV |    | M    | N |

|     |                   |    |                     |                         |             |           |             |      |      |       |     |      |      |    |    |         |     |    |    |   |   |
|-----|-------------------|----|---------------------|-------------------------|-------------|-----------|-------------|------|------|-------|-----|------|------|----|----|---------|-----|----|----|---|---|
| 283 | Uinta Mountains   | UT | Lower Shingle Cr Lk | Directly above late     | TALV        | 40.663082 | -111.073875 | 2988 | 2959 | 3.2   | NW  | 2981 | 2966 | 27 | 29 | N       | R   | WM | LK | M | N |
| 313 | Uinta Mountains   | UT | Moffitt Pk          |                         | TALV        | 40.818139 | -110.946351 | 3061 | 2961 | 9.2   | N   | 2979 | 2966 | 34 | 21 | N       | R   | WM |    | M | N |
| 306 | Uinta Mountains   | UT | Mt Agassiz-1        | Ryder Lk                | RGC         | 40.719582 | -110.827963 | 3359 | 3278 | 6.6   | N   | 3313 | 3290 | 43 | 28 | N       | R   | WM | LK | M | N |
| 307 | Uinta Mountains   | UT | Mt Agassiz-2        | Ryder Lk                | RGC         | 40.721099 | -110.832036 | 3297 | 3335 | 2.4   | N   | 3319 | 3305 | 31 | 24 | N       | A2? | LK |    | M | N |
| 308 | Uinta Mountains   | UT | Mt Agassiz-3        | Ryder Lk                | RGC         | 40.723291 | -110.838347 | 3377 | 3305 | 15.9  | NE  | 3338 | 3316 | 33 | 34 | Y       | A2  | WM | RK | M | N |
| 293 | Uinta Mountains   | UT | Mt Watson           | W end of ridge          | TALV        | 40.698686 | -110.991326 | 3193 | 3155 | 1.1   | W   | 3180 | 3156 | 44 | 29 | N       | R   | WM | LK | M | N |
| 294 | Uinta Mountains   | UT | Mt Watson           | N side of mountain      | TALV        | 40.702961 | -110.984101 | 3273 | 3166 | 11.6  | N   | 3205 | 3186 | 43 | 24 | N       | R   | WM |    | M | N |
| 295 | Uinta Mountains   | UT | Murdock Mtn         | W side of mountain      | TALV        | 40.661729 | -110.915668 | 3177 | 3081 | 14.7  | W   | 3142 | 3125 | 31 | 29 | N       | R   | UV | WM | M | N |
| 314 | Uinta Mountains   | UT | Notch Mtn           | Far N end of upland     | TALV        | 40.746704 | -110.971757 | 3014 | 2846 | 7.2   | E   | 2958 | 2954 | 19 | 14 | N       | R   | UV |    | M | N |
| 302 | Uinta Mountains   | UT | Ostler Pk           | Priord Lk               | RGC         | 40.74944  | -110.740485 | 3492 | 3317 | 27.8  | N   | 3332 | 3318 | 22 | 34 | Y       | A1  | LK | WM | M | N |
| 304 | Uinta Mountains   | UT | Ostler Pk           | Ostler Lk               | RGC         | 40.755044 | -110.776230 | 3340 | 3283 | 2.3   | W   | 3299 | 3282 | 34 | 26 | Y       | A2  | WM |    | M | N |
| 305 | Uinta Mountains   | UT | Ostler Pk           | Amethyst Lake           | TALV        | 40.749936 | -110.761953 | 3379 | 3285 | 6.0   | E   | 3328 | 3307 | 47 | 24 | N       | R   | LK | WM | M | N |
| 296 | Uinta Mountains   | UT | Reids Pk            |                         | TALV        | 40.709997 | -110.917838 | 3177 | 3146 | 0.8   | NW  | 3165 | 3155 | 18 | 29 | N       | R   | UV |    | M | N |
| 284 | Uinta Mountains   | UT | Upper Shingle Cr Lk | along lg portion of cre | TALV        | 40.667501 | -111.065600 | 3111 | 3033 | 5.4   | NW  | 3079 | 3058 | 40 | 28 | N       | R   | LK | UV | M | N |
| 286 | Uinta Mountains   | UT | W Shingle Cr Lk     | N of lake across ridge  | RGC         | 40.687636 | -111.091149 | 3094 | 3074 | 4.7   | NE  | 3073 | 3069 | 22 | 9  | N       | R   | LK |    | M | N |
| 287 | Uinta Mountains   | UT | W Shingle Cr Lk     | Farthest N from lake    | TALV        | 40.70351  | -111.082880 | 3006 | 2968 | 2.7   | N   | 2998 | 2980 | 31 | 30 | N       | R   | UV | RK | M | N |
| 323 | Warner Mountains  | OR | Drake Pk            | E ridge                 | TALV        | 42.30309  | -120.121337 | 2348 | 2323 | 0.4   | NNW | 2332 | 2324 | 29 | 15 | N       | R   | UV |    | M | N |
| 317 | Warner Mountains  | CA | Eagle Peak North    | Crest to NW             | TALC        | 41.307609 | -120.194765 | 2648 | 2614 | 1.0   | E   | 2616 | 2603 | 45 | 16 | N       | R   | UV |    | M | N |
| 318 | Warner Mountains  | CA | Eagle Peak North    | Crest to NW             | TALC        | 41.312748 | -120.198522 | 2669 | 2656 | 0.3   | NE  | 2674 | 2661 | 43 | 17 | Shallow | A2? | UV |    | M | N |
| 319 | Warner Mountains  | CA | Eagle Peak North    | Crest to N              | TALC        | 41.319068 | -120.197832 | 2647 | 2610 | 1.1   | E   | 2623 | 2598 | 57 | 24 | N       | R   | SH |    | M | N |
| 320 | Warner Mountains  | CA | Eagle Peak North    | Crest to N              | TALC        | 41.336797 | -120.196067 | 2678 | 2660 | 0.3   | NE  | 2675 | 2670 | 26 | 11 | N       | R   | RK | UV | M | N |
| 321 | Warner Mountains  | CA | Eagle Peak North    | Crest to N              | TALC        | 41.338812 | -120.195923 | 2656 | 2647 | 0.1   | E   | 2669 | 2652 | 48 | 20 | N       | R   | RK | SH | M | N |
| 316 | Warner Mountains  | CA | Eagle Peak South    | Crest to SE             | TALC        | 41.273412 | -120.186560 | 2551 | 2517 | 0.7   | NE  | 2523 | 2500 | 51 | 24 | N       | R   | UV |    | M | N |
| 324 | Warner Mountains  | OR | Highgrade Springs   | Low volcanic slump?     | TALC        | 41.947129 | -120.227746 | 2356 | 2316 | 0.5   | SW  | 2318 | 2316 | 21 | 5  | N       | R   | UV | SH | M | N |
| 322 | Warner Mountains  | CA | Mt Warren           | Patterson LK            | RGC         | 41.380024 | -120.218508 | 2844 | 2755 | 4.2   | N   | 2794 | 2752 | 57 | 36 | N       | A1  | LK |    | M | N |
| 315 | Warner Mountains  | CA | N Emerson Lk        | Crest above lake        | TALC        | 41.265285 | -120.182085 | 2534 | 2484 | 0.6   | NE  | 2518 | 2478 | 47 | 40 | N       | R   | LK |    | M | N |
| 325 | Warner Mountains  | OR | Warren Pk           | Cottonwod Lk            | TALC        | 41.39014  | -120.223692 | 2687 | 2616 | 4.6   | NE  | 2670 | 2656 | 34 | 23 | N       | R   | LK | WM | M | Y |
| 326 | Warner Mountains  | OR | Warren Pk           | Patterson Lk            | RGC         | 41.382117 | -120.223771 | 2843 | 2798 | 0.9   | E   | 2812 | 2804 | 17 | 27 | N       | A2  | LK | RK | M | N |
| 327 | Warner Mountains  | OR | Warren Pk           | Patterson LK            | TALV        | 41.383229 | -120.223024 | 2794 | 2781 | 0.1   | E   | 2790 | 2785 | 10 | 25 | N       | R   | LK | RK | M | N |
| 375 | Wasatch Mountains | UT | Big Baldy           | Far N end of upland     | RGC         | 40.411002 | -111.659552 | 3215 | 3043 | 4.1   | N   | 3081 | 3046 | 61 | 29 | Y       | A1  | RK |    | M | Y |
| 374 | Wasatch Mountains | UT | Clayton Pk          | Dog Lk                  | TALV        | 40.584239 | -111.580865 | 3009 | 2969 | 1.2   | NW  | 2985 | 2969 | 23 | 34 | N       | R   | RK | SH | M | N |
| 376 | Wasatch Mountains | UT | Freedom Pk          |                         | TALC        | 40.262051 | -111.535088 | 2945 | 2836 | 7.0   | N   | 2904 | 2897 | 15 | 24 | Y       | A2  | UV |    | M | N |
| 377 | Wasatch Mountains | UT | Freedom Pk          |                         | TALC        | 40.256075 | -111.540282 | 2974 | 2967 | 0.3   | NE  | 2969 | 2967 | 8  | 15 | N       | A2  | LK | SH | M | Y |
| 354 | Wasatch Mountains | UT | Lone Peak           | Hardy Lk                | RGC         | 40.526475 | -111.734123 | 3216 | 3032 | 4.0   | S   | 3087 | 3079 | 13 | 29 | N       | A2  | LK | WM | M | N |
| 355 | Wasatch Mountains | UT | Lone Peak           |                         | RGC         | 40.524219 | -111.760884 | 3223 | 3114 | 6.7   | SW  | 3145 | 3123 | 34 | 33 | N       | A2  | UV | WM | M | N |
| 356 | Wasatch Mountains | UT | Lone Peak           | Upper Bell Cyn Res      | RGC         | 40.529453 | -111.747907 | 3117 | 2922 | 37.5  | N   | 3005 | 2989 | 28 | 31 | Y       | A2  | WM | UV | M | N |
| 357 | Wasatch Mountains | UT | Lone Peak           |                         | RGC         | 40.540099 | -111.736899 | 3079 | 3078 | 15.6  | N   | 3149 | 3136 | 23 | 31 | Y       | A1  | LK | WM | M | N |
| 358 | Wasatch Mountains | UT | Lone Peak           |                         | RGC         | 40.551804 | -111.732966 | 3094 | 2815 | 14.6  | N   | 2905 | 2900 | 18 | 16 | N       | R   | UV |    | M | N |
| 359 | Wasatch Mountains | UT | Lone Peak           |                         | RGC         | 40.539384 | -111.721392 | 3148 | 2822 | 169.0 | N   | 3024 | 2987 | 79 | 25 | Y       | A1  | RK | UV | M | Y |
| 360 | Wasatch Mountains | UT | Lone Peak           |                         | Pleisto RGI | 40.549975 | -111.720523 | 3148 | 2615 | 201.0 | N   | 2652 | 2635 | 32 | 28 | Y       | R   | UV |    | M | N |
| 361 | Wasatch Mountains | UT | Lone Peak           |                         | RGC         | 40.539672 | -111.703575 | 3211 | 2987 | 30.8  | N   | 3108 | 3096 | 30 | 20 | Y       | A1  | LK | WM | M | N |
| 362 | Wasatch Mountains | UT | Lone Peak           |                         | TALC        | 40.5484   | -111.707274 | 3089 | 2642 | 27.6  | E   | 2974 | 2959 | 29 | 28 | Y       | A1  | LK | WM | M | N |
| 363 | Wasatch Mountains | UT | Lone Peak           |                         | TALC        | 40.547184 | -111.700648 | 3053 | 2935 | 4.4   | W   | 2977 | 2957 | 50 | 23 | N       | A1  | LK | WM | M | N |
| 343 | Wasatch Mountains | UT | Mt Baldy            | North end of ridge      | TALV        | 40.556697 | -111.649678 | 3206 | 3118 | 1.6   | NW  | 3134 | 3125 | 22 | 22 | N       | R   | UV | WM | M | N |

|     |                   |    |               |                      |       |           |             |      |      |      |       |      |      |     |    |   |     |    |    |      |   |
|-----|-------------------|----|---------------|----------------------|-------|-----------|-------------|------|------|------|-------|------|------|-----|----|---|-----|----|----|------|---|
| 344 | Wasatch Mountains | UT | Mt Baldy      | North end of ridge   | TALV  | 40.562731 | -111.637866 | 3159 | 3119 | 2.9  | SE    | 3126 | 3118 | 22  | 19 | N | R   | UV |    | M    | N |
| 345 | Wasatch Mountains | UT | Mt Baldy      |                      | RGC   | 40.547451 | -111.648126 | 3294 | 3050 | 10.0 | SE/E  | 3247 | 3215 | 42  | 37 | Y | A2  | RK |    | M    | N |
| 328 | Wasatch Mountains | UT | Mt Ogden      |                      | TALC  | 41.202455 | -111.879396 | 2687 | 2581 | 4.4  | E     | 2670 | 2656 | 29  | 26 | Y | R   | UV |    | M    | N |
| 329 | Wasatch Mountains | UT | Mt Ogden      |                      | TALC  | 41.190645 | -111.871507 | 2692 | 2629 | 2.2  | N     | 2652 | 2650 | 12  | 11 | N | R   | UV |    | M    | N |
| 330 | Wasatch Mountains | UT | Mt Ogden      |                      | TALV  | 41.189635 | -111.869169 | 2658 | 2635 | 0.5  | ENE   | 2643 | 2635 | 15  | 26 | N | R   | UV |    | M    | N |
| 331 | Wasatch Mountains | UT | Mt Ogden      |                      | TALV  | 41.184211 | -111.863181 | 2598 | 2564 | 1.3  | NE    | 2577 | 2564 | 27  | 26 | N | R   | UV |    | M    | N |
| 334 | Wasatch Mountains | UT | Mt Olympus    |                      | TALV  | 40.657877 | -111.746801 | 2790 | 2689 | 2.0  | N     | 2724 | 2694 | 46  | 33 | N | R   | UV |    | M    | N |
| 333 | Wasatch Mountains | UT | Mt Raymond    |                      | TALV  | 40.656652 | -111.698240 | 2900 | 2851 | 2.0  | N & E | 2862 | 2852 | 15  | 34 | N | R   | UV |    | M    | N |
| 368 | Wasatch Mountains | UT | Mt Timpanogos | Emerald Lake         | RGC   | 40.39058  | -111.640611 | 3310 | 3154 | 12.3 | N     | 3164 | 3161 | 17  | 10 | Y | A1  | LK |    | M    | y |
| 369 | Wasatch Mountains | UT | Mt Timpanogos |                      | RGC   | 40.419634 | -111.657344 | 2750 | 2708 | 8.5  | N     | 2724 | 2717 | 20  | 18 | Y | R   | UV |    | M    | N |
| 370 | Wasatch Mountains | UT | Mt Timpanogos | Big Baldy            | TALC  | 40.390134 | -111.628896 | 3090 | 3150 | 2.9  | N     | 3111 | 3103 | 7   | 50 | N | A2  | LK | WM | M    | Y |
| 371 | Wasatch Mountains | UT | Mt Timpanogos | Big Baldy            | TALC  | 40.371602 | -111.621031 | 2924 | 2813 | 19.7 | WNW   | 2855 | 2848 | 12  | 28 | Y | A1  | UV |    | M    | N |
| 372 | Wasatch Mountains | UT | Mt Timpanogos | Big Baldy            | TALV  | 40.383337 | -111.629335 | 3129 | 3036 | 3.2  | NE    | 3069 | 3064 | 28  | 12 | N | A1  | LK | WM | M    | Y |
| 373 | Wasatch Mountains | UT | Mt Timpanogos | Big Baldy            | TALV  | 40.373602 | -111.629956 | 3104 | 2998 | 2.5  | E     | 3074 | 3061 | 22  | 29 | N | R   | UV |    | M    | N |
| 340 | Wasatch Mountains | UT | Mt Wolverine  | Twin Lakes Reservoir | RGC   | 40.590389 | -111.602525 | 3154 | 2941 | 23.3 | N     | 2986 | 2962 | 40  | 31 | Y | A2  | LK | WM | M    | N |
| 341 | Wasatch Mountains | UT | Mt Wolverine  | Lake Mary            | TALC  | 40.586295 | -111.597633 | 3176 | 3063 | 2.5  | NE    | 3102 | 3096 | 15  | 20 | N | R   | UV |    | M    | N |
| 335 | Wasatch Mountains | UT | Superior Pk   | Lake Blanche         | TALC  | 40.597039 | -111.681822 | 3050 | 2847 | 10.0 | NE    | 2920 | 2909 | 26  | 22 | N | R   | LK | WM | M    | N |
| 336 | Wasatch Mountains | UT | Superior Pk   | Lake Blanche upper   | RGC   | 40.593962 | -111.675073 | 3050 | 3047 | 6.9  | N     | 3096 | 3083 | 30  | 22 | Y | R   | LK | WM | M    | N |
| 337 | Wasatch Mountains | UT | Superior Pk   |                      | TALC  | 40.595592 | -111.669965 | 3277 | 3177 | 9.5  | N     | 3196 | 3183 | 25  | 28 | Y | A2  | LK | WM | M    | N |
| 338 | Wasatch Mountains | UT | Superior Pk   |                      | TALC  | 40.596051 | -111.664021 | 3189 | 3064 | 3.4  | N     | 3135 | 3133 | 10  | 14 | N | R   | UV |    | M    | N |
| 339 | Wasatch Mountains | UT | Superior Pk   |                      | TALC  | 40.596719 | -111.658532 | 3026 | 2901 | 5.1  | N     | 2962 | 2960 | 13  | 9  | N | R   | UV |    | M    | N |
| 332 | Wasatch Mountains | UT | Thurston Pk   |                      | TALC  | 41.082676 | -111.846399 | 2705 | 2676 | 2.9  | NE    | 2690 | 2681 | 27  | 18 | N | R   | UV | SH | M    | N |
| 342 | Wasatch Mountains | UT | White Baldy   | North end of ridge   | RGC   | 40.555095 | -111.659762 | 3222 | 3085 | 7.0  | N     | 3141 | 3137 | 12  | 18 | Y | A1  | RK | UV | M    | N |
| 346 | Wasatch Mountains | UT | White Baldy   |                      | RGC   | 40.544918 | -111.667498 | 3234 | 3014 | 16.5 | NW    | 3101 | 3085 | 28  | 30 | Y | A1  | RK | WM | M    | Y |
| 347 | Wasatch Mountains | UT | White Baldy   | White Pine Lk N      | RGC   | 40.544156 | -111.676135 | 3143 | 2923 | 15.4 | NW    | 2957 | 2946 | 24  | 24 | N | R   | UV |    | M    | N |
| 348 | Wasatch Mountains | UT | White Baldy   | White Pine Lk        | RGC   | 40.5365   | -111.678489 | 3252 | 3060 | 17.7 | NW    | 3157 | 3109 | 66  | 36 | Y | A1  | LK |    | M    | Y |
| 349 | Wasatch Mountains | UT | White Baldy   | Silver Lk 1          | TALC  | 40.526879 | -111.683083 | 3244 | 3196 | 3.7  | NW    | 3200 | 3196 | 25  | 11 | N | R   | UV | WM | M    | N |
| 350 | Wasatch Mountains | UT | White Baldy   | Silver Lk 2          | TALV  | 40.524659 | -111.681217 | 3199 | 3117 | 1.1  | ESE   | 3134 | 3119 | 40  | 20 | N | R   | RK |    | M    | N |
| 351 | Wasatch Mountains | UT | White Baldy   |                      | TALC  | 40.523481 | -111.688784 | 3270 | 3143 | 5.7  | S     | 3182 | 3175 | 25  | 16 | Y | A2  | WM |    | M    | N |
| 352 | Wasatch Mountains | UT | White Baldy   |                      | RGC   | 40.523831 | -111.696900 | 3183 | 2807 | 73.7 | SW    | 2986 | 2961 | 46  | 29 | Y | A1  | UV | WM | M    | N |
| 353 | Wasatch Mountains | UT | White Baldy   |                      | TALV  | 40.522314 | -111.719153 | 3167 | 3073 | 3.4  | E     | 3085 | 3082 | 10  | 22 | N | R   | UV |    | M    | N |
| 364 | Wasatch Mountains | UT | White Baldy   | Red Pine Lk          | RGC   | 40.535549 | -111.687292 | 3222 | 3056 | 30.7 | NNW   | 3165 | 3139 | 34  | 38 | Y | A1  | LK |    | M    | N |
| 365 | Wasatch Mountains | UT | White Baldy   | Red Pine Lk          | TALV  | 40.546133 | -111.696415 | 2958 | 2872 | 4.0  | E     | 2907 | 2891 | 53  | 17 | N | R   | WM |    | M    | N |
| 366 | Wasatch Mountains | UT | White Baldy   | Red Pine Lk          | TALV  | 40.546543 | -111.689935 | 3127 | 2845 | 11.8 | W     | 2988 | 2975 | 29  | 24 | N | A2  | UV |    | M    | N |
| 367 | Wasatch Mountains | UT | White Baldy   | White Pine Lk Lower  | TALC  | 40.544907 | -111.683430 | 3120 | 2923 | 10.4 | NE    | 3005 | 2999 | 14  | 24 | Y | A2  | SH | UV | M    | N |
| 378 | Wassuk Range      | NV | Corey Pk      | Slope betw summit ar | Slump | 38.460557 | -118.772366 | 2817 | 2678 | 4.0  | N     | 2738 | 2679 | 102 | 30 | N | R   | UV |    | F, M | N |
| 379 | Wassuk Range      | NV | Mt Grant      | Dutch Cr             | Slump | 38.581252 | -118.790302 | 3173 | 3072 | 2.0  | N     | 3108 | 3067 | 99  | 23 | N | R   | UV |    | F, M | N |
| 390 | White Mountains   | CA | Davis Cyn     | N Fk Cirque          | RGC   | 37.758651 | -118.301789 | 3687 | 3602 | 2.2  | NE    | 3677 | 3672 | 17  | 16 | N | A1  | RK |    | M    | N |
| 391 | White Mountains   | CA | Davis Cyn     | N Fk mid- cyn        | TALV  | 37.764238 | -118.304455 | 3561 | 3451 | 3.2  | N     | 3490 | 3462 | 45  | 32 | Y | A1  | RK |    | M    | N |
| 392 | White Mountains   | CA | Davis Cyn     | N Fk lower cyn       | TALV  | 37.766856 | -118.301802 | 3467 | 3398 | 2.8  | SE    | 3431 | 3415 | 47  | 18 | Y | A1  | RK | WM | M    | N |
| 393 | White Mountains   | CA | Davis Cyn     | N Fk lower cyn       | TALV  | 37.772423 | -118.296175 | 3402 | 3210 | 8.8  | E     | 3313 | 3264 | 122 | 22 | N | R   | SP | WM | M    | N |
| 394 | White Mountains   | CA | Davis Cyn     | Cirque headwall      | RGC   | 37.764032 | -118.304233 | 3541 | 3458 | 3.0  | N     | 3529 | 3514 | 27  | 29 | N | A2? | WM | RK | M    | N |
| 395 | White Mountains   | CA | Leidy Cyn     | Upper canyon         | TALC  | 37.670454 | -118.249902 | 3508 | 3425 | 2.1  | E     | 3454 | 3445 | 20  | 26 | N | A2  | RK | WM | M    | N |
| 382 | White Mountains   | CA | Mt Dubois     | N Chiatc Cirque head | RGC   | 37.786646 | -118.332896 | 3863 | 3766 | 2.9  | NE    | 3791 | 3784 | 17  | 23 | Y | A1  | RK |    | M    | Y |

|     |                 |    |                    |                    |       |           |             |      |      |       |         |      |      |     |    |   |     |    |       |      |   |
|-----|-----------------|----|--------------------|--------------------|-------|-----------|-------------|------|------|-------|---------|------|------|-----|----|---|-----|----|-------|------|---|
| 383 | White Mountains | CA | Mt Dubois N Chiatc | Mid-canyon         | RGC   | 37.797397 | -118.317881 | 3406 | 3161 | 31.5  | NE      | 3183 | 3163 | 34  | 31 | Y | A2  | SP | WM    | M    | N |
| 381 | White Mountains | CA | N Chiatovich       | Valley wall        | TALC  | 37.788558 | -118.328464 | 3649 | 3519 | 3.0   | N       | 3616 | 3556 | 109 | 29 | N | A2  | RK | WM    | M    | N |
| 384 | White Mountains | CA | N Chiatovich       | Low-mid canyon     | RGC   | 37.805756 | -118.293963 | 3083 | 2697 | 91.4  | W       | 2887 | 2709 | 401 | 24 | N | R   | SP | WM    | F, M | N |
| 396 | White Mountains | CA | NN Perry Aiken     | Uppermost cirque   | RGC   | 37.64094  | -118.248849 | 3924 | 3831 | 2.0   | NNE     | 3871 | 3864 | 21  | 18 | Y | A2? | RK |       | M    | N |
| 397 | White Mountains | CA | NN Perry Aiken     | Mid upper cirque   | RGC   | 37.642856 | -118.239708 | 3785 | 3591 | 34.0  | N to NE | 3648 | 3617 | 69  | 24 | Y | A2  | RK |       | F, M | N |
| 398 | White Mountains | CA | NN Perry Aiken     | Mid cirque         | RGC   | 37.649881 | -118.238783 | 3599 | 3475 | 10.0  | E       | 3490 | 3480 | 36  | 16 | Y | R   | WM |       | F, M | N |
| 385 | White Mountains | CA | S Chiatovich       | Cirque top         | RGC   | 37.769342 | -118.322454 | 3755 | 3667 | 9.0   | NE      | 3718 | 3675 | 69  | 32 | Y | A1  | RK | KARST | M    | N |
| 386 | White Mountains | CA | S Chiatovich       | Mid-canyon         | TALC  | 37.77363  | -118.313682 | 3570 | 3402 | 7.3   | N       | 3527 | 3509 | 34  | 28 | N | A1  | RK | WM    | M    | N |
| 387 | White Mountains | CA | S Chiatovich       | Mid-canyon         | TALV  | 37.776747 | -118.316360 | 3572 | 3404 | 17.3  | E       | 3477 | 3438 | 78  | 27 | Y | A1  | RK |       | M    | N |
| 388 | White Mountains | CA | S Chiatovich       | Lower mid-canyon   | RGC   | 37.781304 | -118.310913 | 3397 | 3294 | 7.7   | NE      | 3335 | 3297 | 69  | 29 | N | R   | SP | WM    | M    | N |
| 389 | White Mountains | CA | S Chiatovich       | Lower-canyon       | RGC   | 37.797562 | -118.280290 | 3178 | 2591 | 151.0 | ENE     | 2697 | 2637 | 201 | 16 | N | R   | WM | SH    | F, M | N |
| 399 | White Mountains | CA | S McAfee           | Mid canyon         | TALV  | 37.589077 | -118.212791 | 3490 | 3472 | 0.4   | N       | 3476 | 3473 | 10  | 15 | N | R   | WM | RK    | M    | N |
| 400 | White Mountains | CA | S McAfee           | Mid canyon         | TALV  | 37.588383 | -118.211513 | 3485 | 3460 | 0.2   | NE      | 3474 | 3470 | 27  | 8  | N | R   | WM |       | M    | N |
| 380 | White Mountains | CA | Trail Cyn          | Betw upper cirques | Slump | 37.860643 | -118.332268 | 3057 | 3007 | 2.0   | N       | 3018 | 3013 | 43  | 6  | N | R   | UV |       | F, M | N |
| 401 | Yamsay Mountain | OR | Main cirque        | Bottom of cirque   | TALC  | 42.931953 | -121.361305 | 2384 | 2368 | 0.1   | N       | 2373 | 2371 | 7   | 12 | N | R   | WM | SH    | F, M | N |

#### Mountain Ranges Surveyed But No Rock Glaciers Found

|     |                    |    |
|-----|--------------------|----|
| 1   | Abert Rim          | OR |
| 2   | Antelope Range     | NV |
| 5   | Bilk Creek Mtns    | CA |
| 6   | Bodie Mountains    | CA |
| 7   | Bruneau Mtns       | NV |
| 8   | Bull Run Mtns      | NV |
| 19  | Cherry Creek Range | NV |
| 20  | Clan Alpine        | NV |
| 22  | Desatoya Range     | NV |
| 30  | Diamond Mountains  | NV |
| 31  | Duck Creek Range   | NV |
| 43  | Egan Range         | NV |
| 76  | Fox Creek Range    | NV |
| 77  | Grant Range        | NV |
| 78  | Hart Mountains     | NV |
| 79  | Hot Creek Range    | NV |
| 80  | Ichabod Range      | NV |
| 82  | Inyo Mountains     | CA |
| 105 | Kern Mtns          | NV |
| 110 | Oregon Cyn Mtns    | CA |
| 111 | Oquirrh Mountains  | UT |
| 112 | Panamint Range     | CA |
| 113 | Pavant Range       | UT |
| 114 | Pequop Mountains   | NV |
| 115 | Pilot Range        | NV |
| 118 | Pine Grove Hills   | NV |
| 119 | Pine Nut Mtns      | NV |

|     |                      |        |
|-----|----------------------|--------|
| 120 | Quinn Cyn Range      | NV     |
| 151 | Santa Rosa Mtns      | NV     |
| 152 | Sheepshead Range     | OR     |
| 172 | Sherman Pk           | UT     |
| 173 | Shoshone Mtns        | NV     |
| 174 | Shoshone Range       | NV     |
| 204 | Stansbury Range      | UT     |
| 267 | Trout Creek Mtns     | NV, CA |
| 402 | Winter Rim           | OR     |
| 880 | Spring Mountains     | NV     |
| 121 | Raft River Mountains | UT     |

**<sup>1</sup> Rock glacier feature type:**

RGC, rock glacier in a cirque setting.

TALC, talus with rampart in cirque or cirque-like setting, including along crests with headwall settings.

TALV, talus with rampart outside of cirque or cirque-like setting, along a ridge or valley wall.

BSR, boulder stream rampart, with subdued features relative to a rock glacier or protalus rampart.

Slump, either a feature of unknown origin but with evidence of having had or have internal ice.

**<sup>2</sup> Rock glacier condition class:**

A1, highly likely ice-embedded, active.

A2, potentially ice-embedded or inactive.

R, most likely relict.

**<sup>3</sup> Forefield environment:**

AS, aspen or willow

LK, lake or tarn

RK, rock

SH, shrub wetland

SP, spring or seep

UV, upland vegetation (dry)

WM, wet meadow or similar

# Supplemental Table S2(b): Persistent Icefields (Glaciers, Icefields, Ice patches) of the Great Basin, version 121918

Millar, C.I. and R.D. Westfall, Geographic, climatic, and hydrologic significance of rock glaciers in the Great Basin, USA

Submitted for archiving at National Snow and Ice Data Center, Feb 19, 2019

| Sample ID | Mountain Range        | State | Location           | Local Setting             | Feature <sup>1</sup> | Coordinates Latitude | Midpoint Longitude | Elev Top (m) | Elev Base (m) | Area (ha) | Aspect | Berg-schund <sup>2</sup> (Y, N) | Field, Map (F, M) |
|-----------|-----------------------|-------|--------------------|---------------------------|----------------------|----------------------|--------------------|--------------|---------------|-----------|--------|---------------------------------|-------------------|
| 1         | East Humboldt Range   | NV    | S of Greys Pk      | Chimney Rock              | HW-RGC               | 41.015407            | -115.101435        | 3064         | 3024          | 0.3       | NE     | N                               | M                 |
| 2         | East Humboldt Range   | NV    | S of Chimney RK    | Along main crest          | HW-TALC              | 41.007195            | -115.099888        | 3006         | 2906          | 0.2       | NE     | N                               | M                 |
| 3         | East Humboldt Range   | NV    | S of Chimney RK    | Along main crest          | HW                   | 41.008021            | -115.101237        | 2994         | 2979          | 0.1       | E      | N                               | M                 |
| 4         | East Humboldt Range   | NV    | S of Chimney RK    | Along main crest          | HW                   | 41.010321            | -115.102014        | 2979         | 2962          | 0.1       | E      | N                               | M                 |
| 5         | East Humboldt Range   | NV    | Lizzie Basin       | Hole-in-the-Mountain      | HW-RGC               | 40.952431            | -115.121008        | 3239         | 3226          | 0.1       | NE     | N                               | M                 |
| 6         | East Humboldt Range   | NV    | Humboldt Pk        | Along main crest          | HW                   | 40.900246            | -115.117819        | 3176         | 3150          | 0.3       | E      | N                               | M                 |
| 7         | East Humboldt Range   | NV    | Humboldt Pk        | Along main crest          | HW-TALC              | 40.896535            | -115.112481        | 2989         | 2941          | 0.4       | NE     | N                               | M                 |
| 8         | East Humboldt Range   | NV    | Steele Lk          | Crest to North of lake    | HW                   | 40.922913            | -115.121051        | 3341         | 3328          | 0.1       | NE     | N                               | M                 |
| 9         | East Humboldt Range   | NV    | Hole-in-the-Mounta | Crest south of P          | HW                   | 40.929519            | -115.122348        | 3144         | 3131          | 0.2       | NE     | N                               | M                 |
| 10        | Jarbridge Range       | NV    | Jarbridge Pk       | Main cirque               | HW-TALV              | 41.848115            | -115.390582        | 2971         | 2953          | 0.1       | NE     | N                               | M                 |
| 11        | Jarbridge Range       | NV    | Jarbridge Pk       | Main cirque               | HW-TALV              | 41.846872            | -115.389739        | 3016         | 2961          | 0.2       | NE     | N                               | M                 |
| 12        | Jarbridge Range       | NV    | Jarbridge Pk       | Main cirque               | HW-TALV              | 41.842578            | -115.387433        | 3066         | 3025          | 0.4       | NE     | N                               | M                 |
| 13        | Jarbridge Range       | NV    | Jumbo Pk           | Main cirque               | HW-RGC               | 41.832997            | -115.386229        | 3105         | 3054          | 0.7       | NE     | N                               | M                 |
| 14        | Jarbridge Range       | NV    | Square Top         | Main cirque               | HW-RGC               | 41.826085            | -115.382993        | 3004         | 2970          | 0.2       | NE     | N                               | M                 |
| 15        | Jarbridge Range       | NV    | Square Top         | Main cirque               | HW-TALC              | 41.823864            | -115.380003        | 3065         | 2947          | 0.3       | NE     | N                               | M                 |
| 16        | Jarbridge Range       | NV    | Square Top         | South of Pk               | HW-TALC              | 41.820005            | -115.377235        | 3097         | 3085          | 0.1       | NE     | N                               | M                 |
| 17        | Jarbridge Range       | NV    | Matterhorn         | Main cirque               | HW-RGC               | 41.812596            | -115.374600        | 3088         | 3041          | 0.4       | NE     | N                               | M                 |
| 18        | Jarbridge Range       | NV    | Cougar Pk          | Main cirque               | HW-RGC               | 41.794437            | -115.367762        | 3015         | 2950          | 0.1       | N      | N                               | M                 |
| 19        | Jarbridge Range       | NV    | Marys River PK     | Main cirque               | HW                   | 41.761719            | -115.358713        | 3066         | 2991          | 0.1       | N      | N                               | M                 |
| 20        | Ruby Mountains        | NV    | Lee Peak           | Griswold Lake             | HW                   | 40.62504             | -115.485209        | 3261         | 3180          | 0.5       | NE     | N                               | M                 |
| 21        | Ruby Mountains        | NV    | Mt Gilbert         | SW of Pk                  | HW                   | 40.619692            | -115.454571        | 3260         | 3210          | 0.2       | NE     | N                               | M                 |
| 22        | Ruby Mountains        | NV    | Mt Fitzgerald      | N of Peak                 | HW                   | 40.606319            | -115.409852        | 3216         | 3141          | 0.4       | N      | N                               | M                 |
| 23        | Ruby Mountains        | NV    | Lamoille Cyn       | Lamoille Lk               | HW                   | 40.589574            | -115.397679        | 3174         | 3112          | 0.03      | N      | N                               | F, M              |
| 24        | Ruby Mountains        | NV    | Lamoille Cyn       | Dollar Lakes              | HW                   | 40.587035            | -115.383841        | 3137         | 3113          | 0.02      | N      | N                               | F, M              |
| 25        | Ruby Mountains        | NV    | Lamoille Cyn       | Dollar Lakes              | HW                   | 40.586897            | -115.380323        | 3151         | 3120          | 0.03      | N      | N                               | F, M              |
| 26        | Ruby Mountains        | NV    | King Pk            | N of Peak                 | HW                   | 40.477485            | -115.467712        | 3109         | 3070          | 0.10      | N      | N                               | M                 |
| 27        | Ruby Mountains        | NV    | Soldier Pk         | SW of Pk along crest      | HW                   | 40.769359            | -115.262960        | 2761         | 2756          | 0.01      | NE     | N                               | M                 |
| 28        | Ruby Mountains        | NV    | Soldier Pk         | SW of Pk along crest      | HW                   | 40.766778            | -115.259766        | 2809         | 2805          | 0.10      | NE     | N                               | M                 |
| 29        | Ruby Mountains        | NV    | Soldier Pk         | SW of Pk along crest      | HW                   | 40.756817            | -115.254206        | 2901         | 2889          | 0.20      | NE     | N                               | M                 |
| 30        | Ruby Mountains        | NV    | Soldier Pk         | SW of Pk along crest      | HW                   | 40.748299            | -115.255259        | 2979         | 2853          | 0.30      | NE     | N                               | M                 |
| 31        | Ruby Mountains        | NV    | Smith Peak N along | Cold Lakes over crest     | HW                   | 40.706048            | -115.304870        | 3253         | 3252          | 0.3       | NE     | N                               | M                 |
| 32        | Ruby Mountains        | NV    | Smith Peak N along | Cold Lakes                | HW                   | 40.711849            | -115.306012        | 3128         | 3113          | 0.05      | NE     | N                               | M                 |
| 33        | Ruby Mountains        | NV    | Smith Peak N along | Cold Lakes                | HW                   | 40.678457            | -115.311679        | 3009         | 2997          | 0.05      | E      | N                               | M                 |
| 34        | Ruby Mountains        | NV    | Ruby Dome          | W of Pk E of RD           | HW                   | 40.621433            | -115.465897        | 3358         | 3344          | 0.30      | NE     | N                               | M                 |
| 35        | Schell Creek Range    | NV    | N Schell Pk        | Crest N of NS Pk          | HW-TALC              | 39.42223             | -114.607384        | 3451         | 3466          | 0.10      | N      | N                               | M                 |
| 57        | Sierra Nevada Central | CA    | Walker W Upper     | Tower Pk                  | HW                   | 38.144608            | -119.5447          | 3479         | 3356          | 4.6       | N      | Y                               | M                 |
| 58        | Sierra Nevada Central | CA    | Walker W Upper     | Ehrnbeck Pk               | HW-RGC               | 38.138925            | -119.513347        | 3329         | 3217          | 3.8       | N      | Y                               | M                 |
| 59        | Sierra Nevada Central | CA    | Walker W Upper     | Center Pk                 | HW                   | 38.146285            | -119.487245        | 3302         | 3137          | 0.7       | N      | N                               | M                 |
| 60        | Sierra Nevada Central | CA    | Walker W Upper     | Hunewill PK               | HW-RGC               | 38.1605              | -119.442771        | 3336         | 3270          | 0.4       | N      | N                               | M                 |
| 61        | Sierra Nevada Central | CA    | Walker E Upper     | Slide Pk S                | HW-RGC               | 38.100024            | -119.448086        | 3271         | 3208          | 0.3       | N      | N                               | M                 |
| 62        | Sierra Nevada Central | CA    | Walker E Upper     | Kettle Pk                 | HW                   | 38.126778            | -119.428299        | 3073         | 3036          | 0.1       | N      | N                               | M                 |
| 63        | Sierra Nevada Central | CA    | Walker E Upper     | Malby Lk                  | HW-RGC               | 38.116072            | -119.418268        | 3261         | 3194          | 0.9       | N      | N                               | F, M              |
| 64        | Sierra Nevada Central | CA    | Walker E Upper     | Sawtooth Ridge Glacier Lk | HW-RGC               | 38.10681             | -119.402744        | 3351         | 3285          | 0.9       | N      | N                               | M                 |
| 65        | Sierra Nevada Central | CA    | Walker E Upper     | Sawtooth Ridge Glacier Lk | HW-RGC               | 38.10657             | -119.39549         | 3467         | 3346          | 2.2       | N      | N                               | M                 |
| 66        | Sierra Nevada Central | CA    | Walker E Upper     | Sawtooth Ridge Matterhor  | HW-RGC               | 38.100097            | -119.38822         | 3466         | 3298          | 6.2       | N      | N                               | M                 |
| 67        | Sierra Nevada Central | CA    | Walker E Upper     | Sawtooth Ridge Matterhor  | HW-RGC               | 38.096197            | -119.381481        | 3480         | 3242          | 12.9      | N      | Y                               | M                 |
| 68        | Sierra Nevada Central | CA    | Walker E Upper     | Sawtooth Ridge Matterhor  | HW                   | 38.09088             | -119.371005        | 3260         | 3137          | 1.5       | N      | N                               | M                 |
| 69        | Sierra Nevada Central | CA    | Walker E Upper     | Sawtooth Ridge Twin Pks   | HW-RGC               | 38.085677            | -119.357744        | 3606         | 3345          | 12.1      | NE     | Y                               | M                 |
| 70        | Sierra Nevada Central | CA    | Walker E Upper     | Twin Peaks                | HW-RGC               | 38.087633            | -119.353018        | 3466         | 3377          | 1.9       | N      | N                               | M                 |
| 71        | Sierra Nevada Central | CA    | Walker E Upper     | Tamarack Cyn Hunewill Lk  | HW-RGC               | 38.103568            | -119.320357        | 3369         | 3237          | 1.8       | N      | N                               | F, M              |
| 72        | Sierra Nevada Central | CA    | Green Cr Cyn       | Twin Peaks                | HW-RGC               | 38.086046            | -119.346561        | 3537         | 3476          | 0.6       | NE     | N                               | M                 |

|     |                       |    |                         |                               |             |           |             |      |      |      |     |   |      |
|-----|-----------------------|----|-------------------------|-------------------------------|-------------|-----------|-------------|------|------|------|-----|---|------|
| 73  | Sierra Nevada Central | CA | Walker E Upper          | Excelsior Main                | HW-RGC      | 38.035405 | -119.310886 | 3548 | 3445 | 1.7  | N   | Y | F, M |
| 74  | Sierra Nevada Central | CA | Walker E Upper          | Excelsior Side                | HW-TALV     | 38.035092 | -119.306298 | 3520 | 3475 | 0.5  | NNE | N | F, M |
| 75  | Sierra Nevada Central | CA | Virginia Cr             | Virginia Cyn head             | HW-TALV     | 38.038837 | -119.291253 | 3358 | 3319 | 0.2  | N   | N | F, M |
| 76  | Sierra Nevada Central | CA | Virginia Cr             | Virginia Cyn head             | HW-RGC      | 38.037301 | -119.287873 | 3380 | 3328 | 0.2  | N   | N | F, M |
| 77  | Sierra Nevada Central | CA | Virginia Cr             | Virginia Cyn Frog Lk          | HW-TALV     | 38.041868 | -119.283526 | 3275 | 3239 | 0.1  | N   | N | F, M |
| 78  | Sierra Nevada Central | CA | Virginia Cr             | Kavanaugh Dunderberg          | HW          | 38.069054 | -119.273922 | 3473 | 3404 | 1.1  | NE  | N | F, M |
| 79  | Sierra Nevada Central | CA | Mono Basin              | Cerulean Basin                | HW-RGC      | 38.027544 | -119.305323 | 3616 | 3428 | 0.9  | NE  | Y | F, M |
| 80  | Sierra Nevada Central | CA | Mono Basin              | Cerulean Basin                | HW-RGC      | 38.024209 | -119.300149 | 3616 | 3545 | 0.3  | NE  | N | F, M |
| 81  | Sierra Nevada Central | CA | Mono Basin              | Lundy 20 Lakes                | HW          | 38.005087 | -119.30225  | 3403 | 3359 | 0.3  | N   | N | M    |
| 82  | Sierra Nevada Central | CA | Mono Basin              | Lundy N aspect                | HW-RGC      | 37.996597 | -119.270734 | 3398 | 3347 | 0.4  | N   | N | F, M |
| 83  | Sierra Nevada Central | CA | Mono Basin              | Lundy N aspect                | HW-RGC      | 37.995463 | -119.267624 | 3451 | 3364 | 0.7  | N   | Y | F, M |
| 84  | Sierra Nevada Central | CA | Mono Basin              | Lundy N aspect                | HW-TALV     | 38.01466  | -119.255505 | 2978 | 2898 | 0.3  | W   | N | M    |
| 85  | Sierra Nevada Central | CA | Mono Basin              | Lake Cyn                      | HW          | 37.988029 | -119.261333 | 3433 | 3373 | 0.2  | N   | N | F, M |
| 86  | Sierra Nevada Central | CA | Mono Basin              | Lee Vining Cyn Untere Duni    | HW-RGC      | 37.922531 | -119.211328 | 3258 | 3243 | 0.2  | N   | N | M    |
| 87  | Sierra Nevada Central | CA | Mono Basin              | Karolyn Cyn                   | HW-RGC      | 37.924667 | -119.216488 | 3310 | 3225 | 2.3  | N   | N | M    |
| 88  | Sierra Nevada Central | CA | Mono Basin              | Ellery Lk                     | HW-RGC      | 37.926378 | -119.229202 | 3341 | 3308 | 0.01 | N   | N | F, M |
| 89  | Sierra Nevada Central | CA | Mono Basin              | North Peak                    | HW-RGC      | 37.984191 | -119.314821 | 3561 | 3424 | 3.2  | NE  | Y | F, M |
| 90  | Sierra Nevada Central | CA | Mono Basin              | Conness Main Glacier W lol    | HW-RGC      | 37.967796 | -119.318461 | 3686 | 3484 | 9.6  | N   | Y | F, M |
| 91  | Sierra Nevada Central | CA | Mono Basin              | Conness Main Glacier E lob    | HW-RGC      | 37.967622 | -119.314235 | 3681 | 3534 | 3.9  | N   | Y | F, M |
| 92  | Sierra Nevada Central | CA | Mono Basin              | Connies East Ridge            | HW          | 37.968698 | -119.307914 | 3600 | 3495 | 2.8  | N   | N | F, M |
| 93  | Sierra Nevada Central | CA | Mono Basin              | Conness Alpine Lk             | HW          | 37.963402 | -119.311612 | 3712 | 3508 | 1.0  | NE  | N | F, M |
| 94  | Sierra Nevada Central | CA | Mono Basin              | Conness Slate Cr              | HW          | 37.95128  | -119.307987 | 3601 | 3412 | 2.7  | N   | N | F, M |
| 95  | Sierra Nevada Central | CA | Mono Basin              | White Mtn Bighorn Lk          | HW-RGC      | 37.945696 | -119.305523 | 3536 | 3427 | 1.9  | N   | N | M    |
| 96  | Sierra Nevada Central | CA | Mono Basin              | White Mtn Finger Lk           | HW          | 37.941895 | -119.294196 | 3527 | 3439 | 0.7  | N   | N | M    |
| 97  | Sierra Nevada Central | CA | Mono Basin              | White Mtn main ice field      | HW          | 37.935886 | -119.282741 | 3573 | 3313 | 3.8  | NE  | N | F, M |
| 98  | Sierra Nevada Central | CA | Mono Basin              | Dana Glacier                  | HW          | 37.90126  | -119.218361 | 3672 | 3459 | 8.6  | NE  | Y | F, M |
| 99  | Sierra Nevada Central | CA | Mono Basin              | Dana Plateau                  | Cirque base | 37.907138 | -119.201355 | 3594 | 3586 | 0.1  | N   | N | M    |
| 100 | Sierra Nevada Central | CA | Mono Basin              | Gibbs RGC                     | HW-RGC      | 37.890789 | -119.203388 | 3517 | 3356 | 3.0  | N   | Y | F, M |
| 101 | Sierra Nevada Central | CA | Mono Basin              | Gibbs Ice Glacier             | HW          | 37.88962  | -119.199894 | 3780 | 3548 | 3.4  | N   | Y | F, M |
| 102 | Sierra Nevada Central | CA | Mono Basin              | Bloody Cyn Mt Lewis           | HW-RGC      | 37.846806 | -119.195933 | 3523 | 3390 | 0.6  | N   | N | M    |
| 103 | Sierra Nevada Central | CA | Mono Basin              | Mt Gibbs                      | HW          | 37.879523 | -119.209163 | 3712 | 3642 | 1.2  | W   | N | M    |
| 104 | Sierra Nevada Central | CA | Mono Basin              | Mt Lewis                      | HW-RGC      | 37.84772  | -119.196392 | 3526 | 3367 | 0.7  | NE  | N | M    |
| 105 | Sierra Nevada Central | CA | Mono Basin              | Mt Lewis                      | HW          | 37.845936 | -119.190171 | 3505 | 3488 | 0.02 | NNE | N | M    |
| 106 | Sierra Nevada Central | CA | Mono Basin              | Kuna Glacier                  | HW-RGC      | 37.815226 | -119.206986 | 3811 | 3677 | 14.5 | NE  | Y | F, M |
| 107 | Sierra Nevada Central | CA | Mono Basin              | Lower Kuna                    | HW          | 37.821908 | -119.203484 | 3599 | 3549 | 0.15 | N   | N | F, M |
| 108 | Sierra Nevada Central | CA | Mono Basin              | Parker Peak                   | HW-RGC      | 37.816664 | -119.196149 | 3751 | 3493 | 13   | N   | Y | F, M |
| 109 | Sierra Nevada Central | CA | Mono Basin              | Lower Parker                  | HW          | 37.824662 | -119.192405 | 3415 | 3400 | 0.1  | NE  | N | M    |
| 110 | Sierra Nevada Central | CA | Mono Basin              | Mt Wood                       | HW-TALC     | 37.816777 | -119.161816 | 3178 | 3150 | 0.2  | NE  | N | F, M |
| 111 | Sierra Nevada Central | CA | Mono Basin              | Alger Lakes                   | HW          | 37.798031 | -119.191879 | 3417 | 3353 | 1.2  | N   | N | M    |
| 112 | Sierra Nevada Central | CA | Mono Basin              | Alger Lakes                   | HW-TALC     | 37.797503 | -119.198827 | 3637 | 3534 | 0.8  | NE  | N | M    |
| 113 | Sierra Nevada Central | CA | Mono Basin              | Above Alger Lks               | HW          | 37.783969 | -119.189337 | 3534 | 3507 | 0.2  | N   | N | M    |
| 114 | Sierra Nevada Central | CA | Mono Basin              | Mt Lyell, just over crest fro | HW          | 37.747431 | -119.252203 | 3675 | 3611 | 0.7  | N   | N | M    |
| 115 | Sierra Nevada Central | CA | Mono Basin              | Mt Lyell, just over crest fro | HW          | 37.736359 | -119.263398 | 3763 | 3669 | 4.7  | N   | Y | M    |
| 116 | Sierra Nevada Central | CA | Mono Basin              | Mt Lyell, just over crest fro | HW          | 37.736054 | -119.256561 | 3684 | 3524 | 3.8  | NE  | Y | M    |
| 117 | Sierra Nevada Central | CA | Mono Basin              | Mt Lyell, just over crest fro | HW          | 37.736626 | -119.252177 | 3530 | 3443 | 1.4  | NE  | N | M    |
| 118 | Sierra Nevada Central | CA | Mono Basin              | Rodgers Pk                    | HW-RGC      | 37.72776  | -119.258788 | 3761 | 3605 | 2.7  | NE  | N | M    |
| 119 | Sierra Nevada Central | CA | Mono Basin              | Rodgers Pk Marie Lks          | HW          | 37.729061 | -119.240991 | 3607 | 3327 | 3.7  | N   | N | M    |
| 120 | Sierra Nevada Central | CA | Mono Basin              | Mt Davis                      | HW-TALC     | 37.725849 | -119.235063 | 3507 | 3431 | 1.3  | N   | N | M    |
| 121 | Sierra Nevada Central | CA | Mono Basin              | Mt Davis Davis Lks            | HW-RGC      | 37.71924  | -119.225315 | 3499 | 3228 | 5.9  | N   | Y | M    |
| 122 | Sierra Nevada Central | CA | Mono Basin              | Mt Davis Davis Lks            | HW-RGC      | 37.716271 | -119.219168 | 3580 | 3437 | 10.8 | N   | Y | M    |
| 123 | Sierra Nevada Central | CA | Mammoth Crest           | N of Barney RG                | HW-TALC     | 37.56558  | -118.982465 | 3376 | 3313 | 0.4  | N   | N | F, M |
| 124 | Sierra Nevada Central | CA | Mammoth Crest           | Barney RG                     | HW-TALC     | 37.565187 | -118.977742 | 3312 | 3292 | 0.1  | N   | N | F, M |
| 125 | Sierra Nevada Central | CA | Sherwin Crest           | Valentine Lk                  | HW-RGC      | 37.566493 | -118.941761 | 3213 | 3168 | 0.2  | N   | N | M    |
| 126 | Sierra Nevada Central | CA | Mammoth Crest           | Sherwin Crest                 | HW-RGC      | 37.553277 | -118.931735 | 3409 | 3385 | 0.1  | N   | N | M    |
| 127 | Sierra Nevada Central | CA | Mammoth Crest           | Sherwin Crest                 | HW-RGC      | 37.549215 | -118.927955 | 3438 | 3391 | 0.1  | N   | N | M    |
| 128 | Sierra Nevada Central | CA | Convict Cyn             | Cloverleaf Lk                 | HW-TALC     | 37.539066 | -118.905274 | 3430 | 3408 | 0.1  | NE  | N | M    |
| 129 | Sierra Nevada Central | CA | Convict Cyn             | Bighorn Lk                    | HW-RGC      | 37.522496 | -118.887703 | 3481 | 3426 | 0.2  | N   | N | M    |
| 130 | Sierra Nevada Central | CA | Convict Cyn Red Slai Lk | Wit So Nah Pah                | HW-TALC     | 37.514451 | -118.875891 | 3510 | 3385 | 0.7  | N   | N | M    |
| 131 | Sierra Nevada Central | CA | Red Slate Mtn           |                               | HW          | 37.508909 | -118.876674 | 3939 | 3629 | 1.1  | N   | N | M    |

|     |                       |    |                   |                           |         |           |             |      |      |       |     |   |      |
|-----|-----------------------|----|-------------------|---------------------------|---------|-----------|-------------|------|------|-------|-----|---|------|
| 132 | Sierra Nevada Central | CA | Red Slate Mtn     | Constance Lk              | HW-RGC  | 37.512763 | -118.870966 | 3541 | 3471 | 1     | N   | Y | M    |
| 133 | Sierra Nevada Central | CA | Red Slate Mtn     | Constance Lk              | HW-RGC  | 37.509944 | -118.867242 | 3685 | 3635 | 0.5   | NE  | N | M    |
| 134 | Sierra Nevada Central | CA | Red Slate Mtn     | Constance Lk              | HW-RGC  | 37.506527 | -118.861509 | 3624 | 3489 | 1.0   | N   | N | M    |
| 135 | Sierra Nevada Central | CA | Mt Morrison       | N face                    | HW      | 37.565639 | -118.860157 | 3269 | 3100 | 1.3   | N   | N | M    |
| 136 | Sierra Nevada Central | CA | McGee Cyn         | Little McGee Lk           | HW      | 37.489504 | -118.857438 | 3663 | 3504 | 0.9   | N   | Y | M    |
| 137 | Sierra Nevada Central | CA | McGee Cyn         |                           | HW-RGC  | 37.51455  | -118.793022 | 3617 | 3544 | 0.6   | N   | Y | M    |
| 138 | Sierra Nevada Central | CA | Hilton Cyn        | Mt Huntington             | HW      | 37.472441 | -118.779131 | 3575 | 3517 | 0.2   | N   | N | M    |
| 139 | Sierra Nevada Central | CA | Hilton Cyn        | Mt Huntington             | HW-RGC  | 37.460243 | -118.770947 | 3542 | 3537 | 0.05  | N   | N | M    |
| 140 | Sierra Nevada Central | CA | Hilton Cyn        | Mt Huntington             | HW-TALC | 37.459895 | -118.766107 | 3500 | 3452 | 0.3   | N   | N | M    |
| 141 | Sierra Nevada Central | CA | Rock Cr           | Ruby Lk Mt Abbott         | HW-RGC  | 37.39039  | -118.785088 | 3940 | 3827 | 1.6   | N   | Y | M    |
| 142 | Sierra Nevada Central | CA | Rock Cr           | Mt Abbott                 | HW-RGC  | 37.387101 | -118.782355 | 3960 | 3923 | 0.5   | NE  | N | M    |
| 143 | Sierra Nevada Central | CA | Rock Cr           | Mt Abbott                 | HW-RGC  | 37.384493 | -118.779861 | 3990 | 3840 | 7.6   | NE  | Y | M    |
| 144 | Sierra Nevada Central | CA | Rock Cr           | s of Mt Abbott crest      | HW-TALC | 37.376434 | -118.776772 | 3865 | 3849 | 0.4   | NE  | N | M    |
| 145 | Sierra Nevada Central | CA | Rock Cr           | Dade Lk                   | HW-RGC  | 37.373917 | -118.769093 | 3526 | 3554 | 1.6   | N   | N | M    |
| 146 | Sierra Nevada Central | CA | Rock Cr           | Francis Cyn               | HW-RGC  | 37.414842 | -118.729061 | 3690 | 3678 | 0.1   | N   | N | M    |
| 147 | Sierra Nevada Central | CA | Pine Cr Cyn       | Bear Cr Spire             | HW      | 37.368841 | -118.764517 | 3903 | 3871 | 0.3   | NE  | N | M    |
| 148 | Sierra Nevada Central | CA | Pine Cr Cyn       | Above Pine Cr Lk          | HW-RGC  | 37.362901 | -118.765933 | 3824 | 3787 | 0.1   | NE  | N | M    |
| 149 | Sierra Nevada Central | CA | Pine Cr Cyn       | Mt Julius Cesar           | HW-RGC  | 37.339956 | -118.781581 | 3753 | 3726 | 0.1   | N   | N | M    |
| 150 | Sierra Nevada Central | CA | Pine Cr Cyn       | Mt Julius Cesar Golden Lk | HW-RGC  | 37.324018 | -118.747562 | 3562 | 3527 | 0.2   | N   | N | M    |
| 151 | Sierra Nevada Central | CA | Pine Cr Cyn       | Above PC Mine             | HW-RGC  | 37.337724 | -118.708681 | 3549 | 3474 | 0.4   | N   | N | M    |
| 152 | Sierra Nevada Central | CA | Gables Lk Cyn     |                           | HW-TALC | 37.311637 | -118.701593 | 3615 | 3558 | 0.5   | N   | N | M    |
| 153 | Sierra Nevada Central | CA | Gables Lk Cyn     |                           | HW-RGC  | 37.308055 | -118.698053 | 3690 | 3629 | 0.7   | N   | N | M    |
| 235 | Sierra Nevada Central | CA | Mono Basin        | Mt Warren                 | HW      | 37.989853 | -119.212389 | 3490 | 3438 | 0.5   | N   | N | F, M |
| 236 | Sierra Nevada Central | CA | Mono Basin        | Mt Warren                 | HW      | 37.985226 | -119.213731 | 3524 | 3487 | 1.2   | NE  | N | F, M |
| 237 | Sierra Nevada Central | CA | Mono Basin        | Mt Warren                 | HW      | 37.985759 | -119.224701 | 3629 | 3611 | 0.1   | NE  | N | F, M |
| 154 | Sierra Nevada South   | CA | Horton Cyn        | Upper Horton Lks          | HW-RGC  | 37.29646  | -118.687808 | 3602 | 3502 | 1.1   | N   | N | M    |
| 155 | Sierra Nevada South   | CA | Horton Cyn        | Upper Horton Lks          | HW-RGC  | 37.291749 | -118.684356 | 3725 | 3578 | 1.4   | N   | N | M    |
| 156 | Sierra Nevada South   | CA | Horton Cyn        | Upper Horton Lks          | HW-RGC  | 37.298094 | -118.673557 | 3536 | 3522 | 0.005 | NE  | N | M    |
| 157 | Sierra Nevada South   | CA | Bishop Cr         | Basin Mtn                 | HW-TALC | 37.299598 | -118.652765 | 3556 | 3529 | 0.1   | NE  | N | M    |
| 158 | Sierra Nevada South   | CA | Bishop Cr         | Mt Humphreys Longley Lk   | HW-RGC  | 37.273305 | -118.671277 | 3850 | 3695 | 10.3  | NE  | Y | M    |
| 159 | Sierra Nevada South   | CA | Bishop Cr         | Mt Humphreys              | HW-RGC  | 37.268066 | -118.667294 | 3809 | 3723 | 0.9   | E   | N | M    |
| 160 | Sierra Nevada South   | CA | Bishop Cr         | Mt Humphreys              | HW-RGC  | 37.261286 | -118.657025 | 3592 | 3536 | 0.9   | N   | N | M    |
| 161 | Sierra Nevada South   | CA | Bishop Cr         | Mt Emerson                | HW-RGC  | 37.24729  | -118.660199 | 3690 | 3619 | 0.4   | N   | N | M    |
| 162 | Sierra Nevada South   | CA | Bishop Cr         | Piute Cyn Emerson Lk      | HW-RGC  | 37.22156  | -118.677717 | 3764 | 3735 | 0.05  | N   | N | M    |
| 163 | Sierra Nevada South   | CA | Bishop Cr         | Lamarck Wonder Lks        | HW-RGC  | 37.216648 | -118.676269 | 3859 | 3638 | 3     | N   | N | M    |
| 164 | Sierra Nevada South   | CA | Bishop Cr         | Lamarck Sky Hi Lk         | HW-RGC  | 37.202932 | -118.676385 | 3842 | 3774 | 1.8   | N   | N | M    |
| 165 | Sierra Nevada South   | CA | Bishop Cr         | Lamarck Sky Hi Lk         | HW-RGC  | 37.198278 | -118.669258 | 3886 | 3602 | 7.3   | N   | N | M    |
| 166 | Sierra Nevada South   | CA | Bishop Cr         | Upper Lamarck Lk          | HW-TALV | 37.202872 | -118.655634 | 3599 | 3547 | 0.5   | N   | N | M    |
| 167 | Sierra Nevada South   | CA | Bishop Cr         | Upper Lamarck Lk          | HW      | 37.194393 | -118.660942 | 3897 | 3761 | 0.8   | N   | N | M    |
| 168 | Sierra Nevada South   | CA | Bishop Cr         | Upper Lamarck Lk          | HW      | 37.191154 | -118.667818 | 3938 | 3896 | 0.6   | NNE | N | M    |
| 169 | Sierra Nevada South   | CA | Bishop Cr         | Sabrina Schoeber Lk       | HW-RGC  | 37.181267 | -118.663422 | 3751 | 3652 | 1.8   | N   | N | M    |
| 170 | Sierra Nevada South   | CA | Bishop Cr         | Mt Darwin                 | HW-RGC  | 37.162415 | -118.66457  | 3834 | 3662 | 1.7   | N   | N | M    |
| 171 | Sierra Nevada South   | CA | Bishop Cr         | Mt Darwin Midnight Lk     | HW-TALV | 37.163544 | -118.651546 | 3553 | 3519 | 0.1   | N   | N | M    |
| 172 | Sierra Nevada South   | CA | Bishop Cr         | Mt Haeckel Hungry Packer  | HW-RGC  | 37.151969 | -118.658229 | 3946 | 3790 | 1.7   | N   | N | M    |
| 173 | Sierra Nevada South   | CA | Bishop Cr         | Mt Haeckel                | HW      | 37.149073 | -118.659958 | 3942 | 3908 | 0.2   | NE  | N | M    |
| 174 | Sierra Nevada South   | CA | Bishop Cr         | Mt Haeckel Echo Lk        | HW-RGC  | 37.141823 | -118.650275 | 3874 | 3762 | 0.8   | NNE | N | M    |
| 175 | Sierra Nevada South   | CA | Bishop Cr         | Mt Haeckel Echo Lk        | HW-RGC  | 37.138797 | -118.642658 | 3776 | 3662 | 2.8   | N   | N | M    |
| 176 | Sierra Nevada South   | CA | Bishop Cr         | Mt Powell Moonlight Lk    | HW-RGC  | 37.141055 | -118.630346 | 3970 | 3764 | 14.4  | N   | Y | M    |
| 177 | Sierra Nevada South   | CA | Bishop Cr         | Mt Thompson Sunset Lk     | HW-RGC  | 37.142115 | -118.621682 | 3900 | 3775 | 17.8  | N   | Y | M    |
| 178 | Sierra Nevada South   | CA | Bishop Cr         | Mt Thompson SE            | HW      | 37.148355 | -118.606467 | 3835 | 3778 | 0.5   | N   | N | M    |
| 179 | Sierra Nevada South   | CA | Bishop Cr         | Mt Gilbert                | HW-RGC  | 37.141435 | -118.604272 | 3992 | 3694 | 16.8  | N   | Y | M    |
| 180 | Sierra Nevada South   | CA | Bishop Cr         | Mt Gilbert                | HW-TALC | 37.135842 | -118.587229 | 3736 | 3594 | 0.8   | N   | N | M    |
| 181 | Sierra Nevada South   | CA | Bishop Cr         | Mt Johnson                | HW-RGC  | 37.13106  | -118.586309 | 3694 | 3627 | 2.6   | N   | N | M    |
| 182 | Sierra Nevada South   | CA | Bishop Cr         | Mt Johnson                | HW-RGC  | 37.124073 | -118.583408 | 3716 | 3659 | 2.3   | N   | Y | M    |
| 183 | Sierra Nevada South   | CA | Bishop Cr         | Mt Goode                  | HW-RGC  | 37.124752 | -118.568398 | 3807 | 3549 | 5     | N   | Y | M    |
| 184 | Sierra Nevada South   | CA | Bishop Cr         | Bishop Pass               | HW-RGC  | 37.115896 | -118.560373 | 3778 | 3548 | 2.7   | N   | Y | M    |
| 185 | Sierra Nevada South   | CA | Bishop Cr         | Bishop Lk                 | HW-TALC | 37.115443 | -118.55594  | 3678 | 3659 | 0.2   | N   | N | M    |
| 186 | Sierra Nevada South   | CA | Big Pine Cr N Pal | Mt Agassiz                | HW-RGC  | 37.113017 | -118.527702 | 3967 | 3815 | 1     | N   | Y | F, M |
| 187 | Sierra Nevada South   | CA | Big Pine Cr N Pal | Mt Robinson 5th Lk        | HW-TALC | 37.124463 | -118.512719 | 3588 | 3529 | 0.3   | N   | N | F, M |

|     |                     |    |                   |                             |         |           |             |      |      |      |     |   |      |
|-----|---------------------|----|-------------------|-----------------------------|---------|-----------|-------------|------|------|------|-----|---|------|
| 188 | Sierra Nevada South | CA | Big Pine Cr N Pal | Mt Winchell                 | HW      | 37.106284 | -118.527638 | 3964 | 3852 | 1.4  | N   | N | F, M |
| 189 | Sierra Nevada South | CA | Big Pine Cr N Pal | Thunderbolt Pk              | HW-RGC  | 37.101175 | -118.51821  | 4079 | 3758 | 15.9 | N   | Y | F, M |
| 190 | Sierra Nevada South | CA | Big Pine Cr N Pal | N Palisades Glacier         | HW-RGC  | 37.101289 | -118.508698 | 4103 | 3681 | 70.3 | N   | Y | F, M |
| 191 | Sierra Nevada South | CA | Big Pine Cr N Pal | N Palisades Glacier         | HW      | 37.106047 | -118.500596 | 3849 | 3766 | 1.1  | N   | N | F, M |
| 192 | Sierra Nevada South | CA | Big Pine Cr S Pal | Temple Crag                 | HW      | 37.103336 | -118.498015 | 4000 | 3836 | 0.3  | N   | N | M    |
| 193 | Sierra Nevada South | CA | Big Pine Cr S Pal | Mt Sill                     | HW-RGC  | 37.095482 | -118.499135 | 3996 | 3812 | 8.3  | NE  | N | F, M |
| 194 | Sierra Nevada South | CA | Big Pine Cr S Pal | Mt Jepson                   | HW-RGC  | 37.089308 | -118.492968 | 3866 | 3722 | 6    | N   | Y | F, M |
| 195 | Sierra Nevada South | CA | Big Pine Cr S Pal | Palisade Crest              | HW-RGC  | 37.079223 | -118.483351 | 3989 | 3537 | 33.9 | NNE | Y | F, M |
| 196 | Sierra Nevada South | CA | Big Pine Cr S Pal | Middle Palisade             | HW-RGC  | 37.072297 | -118.465115 | 3992 | 3626 | 37.4 | NE  | Y | F, M |
| 197 | Sierra Nevada South | CA | Big Pine Cr S Pal | South Fk Pass The Thumb     | HW-RGC  | 37.076163 | -118.448786 | 3634 | 3419 | 0.8  | N   | N | F, M |
| 198 | Sierra Nevada South | CA | Birch Cr          | Birch Crk Cyn               | HW-RGC  | 37.076358 | -118.442501 | 3666 | 3619 | 0.2  | NE  | N | M    |
| 199 | Sierra Nevada South | CA | Birch Cr          | Birch Crk Cyn The Thumb     | HW-RGC  | 37.071562 | -118.441944 | 3758 | 3661 | 1.1  | NE  | N | M    |
| 200 | Sierra Nevada South | CA | Birch Cr          | Birch Crk Cyn Birch Lk      | HW      | 37.064797 | -118.437322 | 3799 | 3664 | 4.7  | NNE | Y | M    |
| 201 | Sierra Nevada South | CA | Birch Cr          | Birch Crk Cyn Birch Lk      | HW-RGC  | 37.05972  | -118.431998 | 3843 | 3646 | 6.2  | NE  | Y | M    |
| 202 | Sierra Nevada South | CA | Tinemaha Cyn      | Mt Bolton Brown             | HW-RGC  | 37.044799 | -118.43689  | 3816 | 3769 | 0.9  | NE  | N | M    |
| 203 | Sierra Nevada South | CA | Tinemaha Cyn      | Tinemaha Lk                 | HW-RGC  | 37.036912 | -118.428973 | 3841 | 3729 | 0.6  | N   | N | M    |
| 204 | Sierra Nevada South | CA | Tinemaha Cyn      | Tinemaha South              | HW-RGC  | 37.02987  | -118.421782 | 3698 | 3586 | 2.6  | N   | Y | M    |
| 205 | Sierra Nevada South | CA | Tinemaha Cyn S    | Mt Tinemaha                 | HW-RGC  | 37.027028 | -118.41806  | 3759 | 3685 | 0.9  | NE  | N | M    |
| 206 | Sierra Nevada South | CA | Tinemaha Cyn S    | Mt Tinemaha                 | HW      | 37.022623 | -118.416542 | 3750 | 3548 | 4    | E   | N | M    |
| 207 | Sierra Nevada South | CA | Tinemaha Cyn S    | Cardinal Mtn                | HW-RGC  | 37.00323  | -118.412452 | 3700 | 3511 | 2.3  | NE  | N | M    |
| 208 | Sierra Nevada South | CA | SS Goodale Cr     | Mt Perkins                  | HW-RGC  | 36.92474  | -118.372457 | 3299 | 3286 | 0.02 | N   | N | M    |
| 209 | Sierra Nevada South | CA | N Oak Cr          | Diamond Pk                  | HW-RGC  | 36.828434 | -118.389254 | 3717 | 3650 | 0.05 | N   | N | M    |
| 210 | Sierra Nevada South | CA | N Oak Cr          | Diamond Pk                  | HW      | 36.813614 | -118.382354 | 3827 | 3722 | 1.2  | N   | N | M    |
| 211 | Sierra Nevada South | CA | Onion Creek       | Kearsarge Pk Sardine Lk     | HW      | 36.795289 | -118.353047 | 3549 | 3540 | 0.1  | N   | N | M    |
| 212 | Sierra Nevada South | CA | Onion Creek       | University Pk               | HW-TALC | 36.753759 | -118.368556 | 3533 | 3657 | 0.6  | N   | N | M    |
| 213 | Sierra Nevada South | CA | Onion Creek       | University Pk Slim Lk       | HW      | 36.752935 | -118.358847 | 3713 | 3542 | 2.2  | N   | N | M    |
| 214 | Sierra Nevada South | CA | Onion Creek       | University Pk Robinson Lk C | HW-RGC  | 36.74403  | -118.353645 | 3741 | 3655 | 0.5  | N   | N | M    |
| 215 | Sierra Nevada South | CA | SS Onion Cr       | Mt Bradley                  | HW      | 36.735963 | -118.346018 | 3658 | 3625 | 0.1  | N   | N | M    |
| 216 | Sierra Nevada South | CA | Mt Tyndall        | Upper cirque                | HW-RGC  | 36.654809 | -118.333108 | 3922 | 3828 | 0.5  | N   | N | M    |
| 217 | Sierra Nevada South | CA | Trojan Pk         | Lk Helen of Troy            | HW-TALC | 36.644559 | -118.320893 | 3904 | 3875 | 0.2  | N   | N | M    |
| 218 | Sierra Nevada South | CA | Mt Barnard        | Under peak summit           | HW      | 36.635057 | -118.318299 | 3977 | 3941 | 0.6  | NE  | N | M    |
| 219 | Sierra Nevada South | CA | Mt Barnard        | Cirque to the south         | HW-RGC  | 36.621018 | -118.3023   | 3722 | 3662 | 9.6  | NE  | N | M    |
| 220 | Sierra Nevada South | CA | Tunnabora Pk      | North cirque                | HW      | 36.612993 | -118.297358 | 3723 | 3691 | 0.3  | N   | N | M    |
| 221 | Sierra Nevada South | CA | Tunnabora Pk      | North cirque                | HW-RGC  | 36.606135 | -118.290819 | 3765 | 3623 | 2.1  | N   | N | M    |
| 222 | Sierra Nevada South | CA | Tunnabora Pk      | South cirque                | HW-RGC  | 36.599166 | -118.273822 | 3830 | 3749 | 1.5  | N   | N | M    |
| 223 | Sierra Nevada South | CA | Tulainyo Lk       | E side                      | HW-TALC | 36.595906 | -118.263084 | 3647 | 3593 | 0.04 | N   | N | M    |
| 224 | Sierra Nevada South | CA | Whitney Portal N  | Mt Russell                  | HW-TALC | 36.584243 | -118.284216 | 3771 | 3702 | 0.1  | N   | N | M    |
| 225 | Sierra Nevada South | CA | Whitney Portal    | Mt Whitney Frog Pond        | HW-RGC  | 36.575027 | -118.288042 | 3944 | 3787 | 1.7  | N   | Y | M    |
| 226 | Sierra Nevada South | CA | Whitney Portal    | Wotan's Throne              | HW-RGC  | 36.566471 | -118.289034 | 3916 | 3868 | 0.1  | N   | N | M    |
| 227 | Sierra Nevada South | CA | Whitney Portal    | Mt Muir                     | HW-RGC  | 36.56295  | -118.289402 | 3904 | 3816 | 0.2  | NE  | N | M    |
| 228 | Sierra Nevada South | CA | Whitney Portal    | Mt Muir                     | HW-RGC  | 36.558686 | -118.285152 | 3976 | 3910 | 0.5  | NE  | N | M    |
| 229 | Sierra Nevada South | CA | Whitney Portal    | Consultation Lk             | HW-RGC  | 36.554245 | -118.273988 | 3901 | 3653 | 3.4  | NE  | Y | M    |
| 230 | Sierra Nevada South | CA | Whitney Portal    | Mt Mallory                  | HW      | 36.549048 | -118.249861 | 3688 | 3665 | 0.05 | N   | N | M    |
| 231 | Sierra Nevada South | CA | Whitney Portal    | Mt Le Conte                 | HW-RGC  | 36.539352 | -118.248183 | 3910 | 3857 | 0.2  | N   | N | M    |
| 232 | Sierra Nevada South | CA | Whitney Portal    | Mt Le Conte                 | HW      | 36.534315 | -118.246691 | 3963 | 3883 | 0.2  | N   | N | M    |
| 233 | Sierra Nevada South | CA | Cottonwood Basin  | Cottonwood Lk #5            | HW      | 36.505437 | -118.233641 | 3575 | 3547 | 0.05 | N   | N | M    |
| 234 | Sierra Nevada South | CA | Cottonwood Basin  | Cottonwood Lk #6            | HW      | 36.482293 | -118.247806 | 3697 | 3631 | 0.6  | N   | N | M    |
| 36  | Snake Range         | NV | Wheeler Pk        | Above main RGC              | HW-RGC  | 38.986079 | -114.308837 | 3670 | 3437 | 0.8  | N   | N | F, M |
| 37  | Snake Range         | NV | Lincoln Pk        | Below summit to S           | HW      | 38.878126 | -114.288627 | 3311 | 3241 | 0.1  | NE  | N | F, M |
| 40  | Steens Mountains    | OR | S Steens Crest    | E cirque S of Steens Pk     | HW-RGC  | 42.667565 | -118.564734 | 2854 | 2795 | 0.3  | NE  | N | M    |
| 38  | Sweetwater Mountair | CA | South Sister      | Crest south of SS           | HW      | 38.454043 | -119.305327 | 3257 | 3169 | 0.4  | NE  | N | M    |
| 39  | Sweetwater Mountair | CA | Mt Wheeler        | East slopes                 | HW      | 38.418627 | -119.285374 | 3464 | 3455 | 0.1  | N   | N | M    |
| 41  | Tushar Mountains    | UT | Mt Holly          | Columns on cliff face       | HW-RGC  | 38.352779 | -112.354519 | 3570 | 3552 | 0.05 | N   | N | M    |
| 42  | Uinta Mountains     | UT | Ostler Peak       | S of pk                     | HW      | 40.743455 | -110.764239 | 3733 | 3630 | 0.2  | N   | N | M    |
| 43  | Uinta Mountains     | UT | Deadhorse Lk      | E of Lk                     | HW      | 40.743684 | -110.68644  | 3489 | 3464 | 0.2  | N   | N | M    |
| 44  | Uinta Mountains     | UT | Deadhorse Lk      | E of Lk                     | HW      | 40.746043 | -110.692578 | 3550 | 3470 | 1.1  | N   | N | M    |
| 45  | Warner Mountains    | CA | Bald Mtn          | Along ridge N of BM         | HW      | 41.629841 | -120.277832 | 2337 | 2334 | 0.5  | E   | N | M    |
| 46  | Warner Mountains    | CA | Warren Pk         | Cottonwood Lk               | HW-TALC | 41.387565 | -120.223336 | 2792 | 2744 | 0.5  | NE  | N | M    |
| 47  | Wasatch Mountains   | UT | White Baldy       | East ridge from pk          | HW-RGC  | 40.542142 | -111.66601  | 3234 | 3199 | 0.6  | N   | N | M    |

|    |                   |    |               |                     |         |           |             |      |      |     |    |   |   |
|----|-------------------|----|---------------|---------------------|---------|-----------|-------------|------|------|-----|----|---|---|
| 48 | Wasatch Mountains | UT | White Baldy   | White Pine Lk       | HW-RGC  | 40.534117 | -111.680353 | 3292 | 3227 | 0.4 | NE | N | M |
| 49 | Wasatch Mountains | UT | Lone Pk       |                     | HW-RGC  | 40.53282  | -111.73136  | 3249 | 3106 | 2   | N  | N | M |
| 50 | Wasatch Mountains | UT | Big Baldy     | Far N end of upland | HW-RGC  | 40.40934  | -111.660096 | 3276 | 3225 | 0.5 | N  | N | M |
| 51 | Wasatch Mountains | UT | Mt Timpanogos | Emerald Lake        | HW-RGC  | 40.386924 | -111.639565 | 3329 | 3247 | 1.5 | N  | N | M |
| 52 | Wasatch Mountains | UT | Big Baldy     | S ridges from BB    | HW-TALC | 40.382536 | -111.630284 | 3174 | 3108 | 0.9 | NE | N | M |
| 53 | Wasatch Mountains | UT | Freedom Pk    |                     | HW-TALC | 40.255754 | -111.540878 | 2983 | 2974 | 0.1 | NE | N | M |
| 54 | Wasatch Mountains | UT | Mt Timpanogos | Big Baldy           | HW-TALC | 40.389821 | -111.632912 | 3234 | 3176 | 0.3 | NE | N | M |
| 55 | White Mountains   | CA | Mt Dubois     | Cirque to the south | HW      | 37.781191 | -118.33827  | 4082 | 4045 | 0.1 | N  | N | M |
| 56 | White Mountains   | CA | Mt Dubois     | Cirque to the south | HW      | 37.777534 | -118.329327 | 4005 | 3992 | 0.1 | NE | N | M |

<sup>1</sup> Icefield context:

HW, headwall no rock glacier associated.

HW-RGC, headwall with RGC rock glacier associated.

HW-TALC, headwall with TALC rock glacier associated.

HW-TALV, headwall with TALV rock glacier associated.

<sup>2</sup> Bergshrund, fractures near top of icefield and parallel to contour.

**Supplemental Table S3:** Correlations among climate variables and canonical vectors (CV) from discriminant analyses of rock glacier locations. Total canonical structure for Great Basin subregions and for rock glacier condition classes (A1, A2, R), with percent of total percent of total variation explained by the CVs and overall canonical correlations ( $r^2$ ). Variables where all individual correlations were  $< 0.4$  are not included.

|                               | Subregions  |             | Rock<br>Glacier<br>Class |
|-------------------------------|-------------|-------------|--------------------------|
|                               | CV1         | CV2         | CV1                      |
| Annual precip                 | -0.06       | 0.47        | 0.47                     |
| Dec precip                    | -0.50       | 0.40        | 0.63                     |
| Jan precip                    | -0.60       | 0.43        | 0.75                     |
| Feb precip                    | -0.59       | 0.44        | 0.68                     |
| July precip                   | 0.83        | 0.14        | -0.32                    |
| Aug precip                    | 0.89        | 0.20        | -0.41                    |
| Sept precip                   | 0.84        | 0.43        | -0.17                    |
| Annual Tmax                   | 0.17        | -0.13       | -0.72                    |
| Dec Tmax                      | -0.48       | -0.01       | -0.28                    |
| Jan Tmax                      | -0.50       | -0.01       | -0.27                    |
| Feb Tmax                      | -0.21       | -0.02       | -0.49                    |
| July Tmax                     | 0.59        | -0.29       | -0.81                    |
| Aug Tmax                      | 0.53        | -0.33       | -0.80                    |
| Sept Tmax                     | 0.30        | -0.22       | -0.75                    |
| Feb Tmin                      | -0.07       | -0.22       | -0.48                    |
| July Tmin                     | 0.56        | 0.00        | -0.61                    |
| Aug Tmin                      | 0.50        | -0.03       | -0.58                    |
| Sept Tmin                     | 0.34        | -0.03       | -0.59                    |
| July TD <sup>1</sup>          | 0.06        | 0.74        | -0.06                    |
| VPDmax <sup>2</sup>           | 0.43        | -0.47       | -0.74                    |
| VPDmin                        | 0.61        | -0.46       | -0.54                    |
| <b>Percent explained</b>      | <b>87</b>   |             | <b>91</b>                |
| <b>Canonical correlations</b> | <b>0.99</b> | <b>0.96</b> | <b>0.20</b>              |

<sup>1</sup> TD, dewpoint temperature

<sup>2</sup> VPD, vapor pressure deficit
